# Supplementary material for: Estimates of Autozygosity Through Runs of Homozygosity in Farmed Coho Salmon
Source: MDPI journal article supplement (doi:10.3390/genes11050490), 2020-04-30
Supplement: s1 [file s1]

Chromosome Okis01

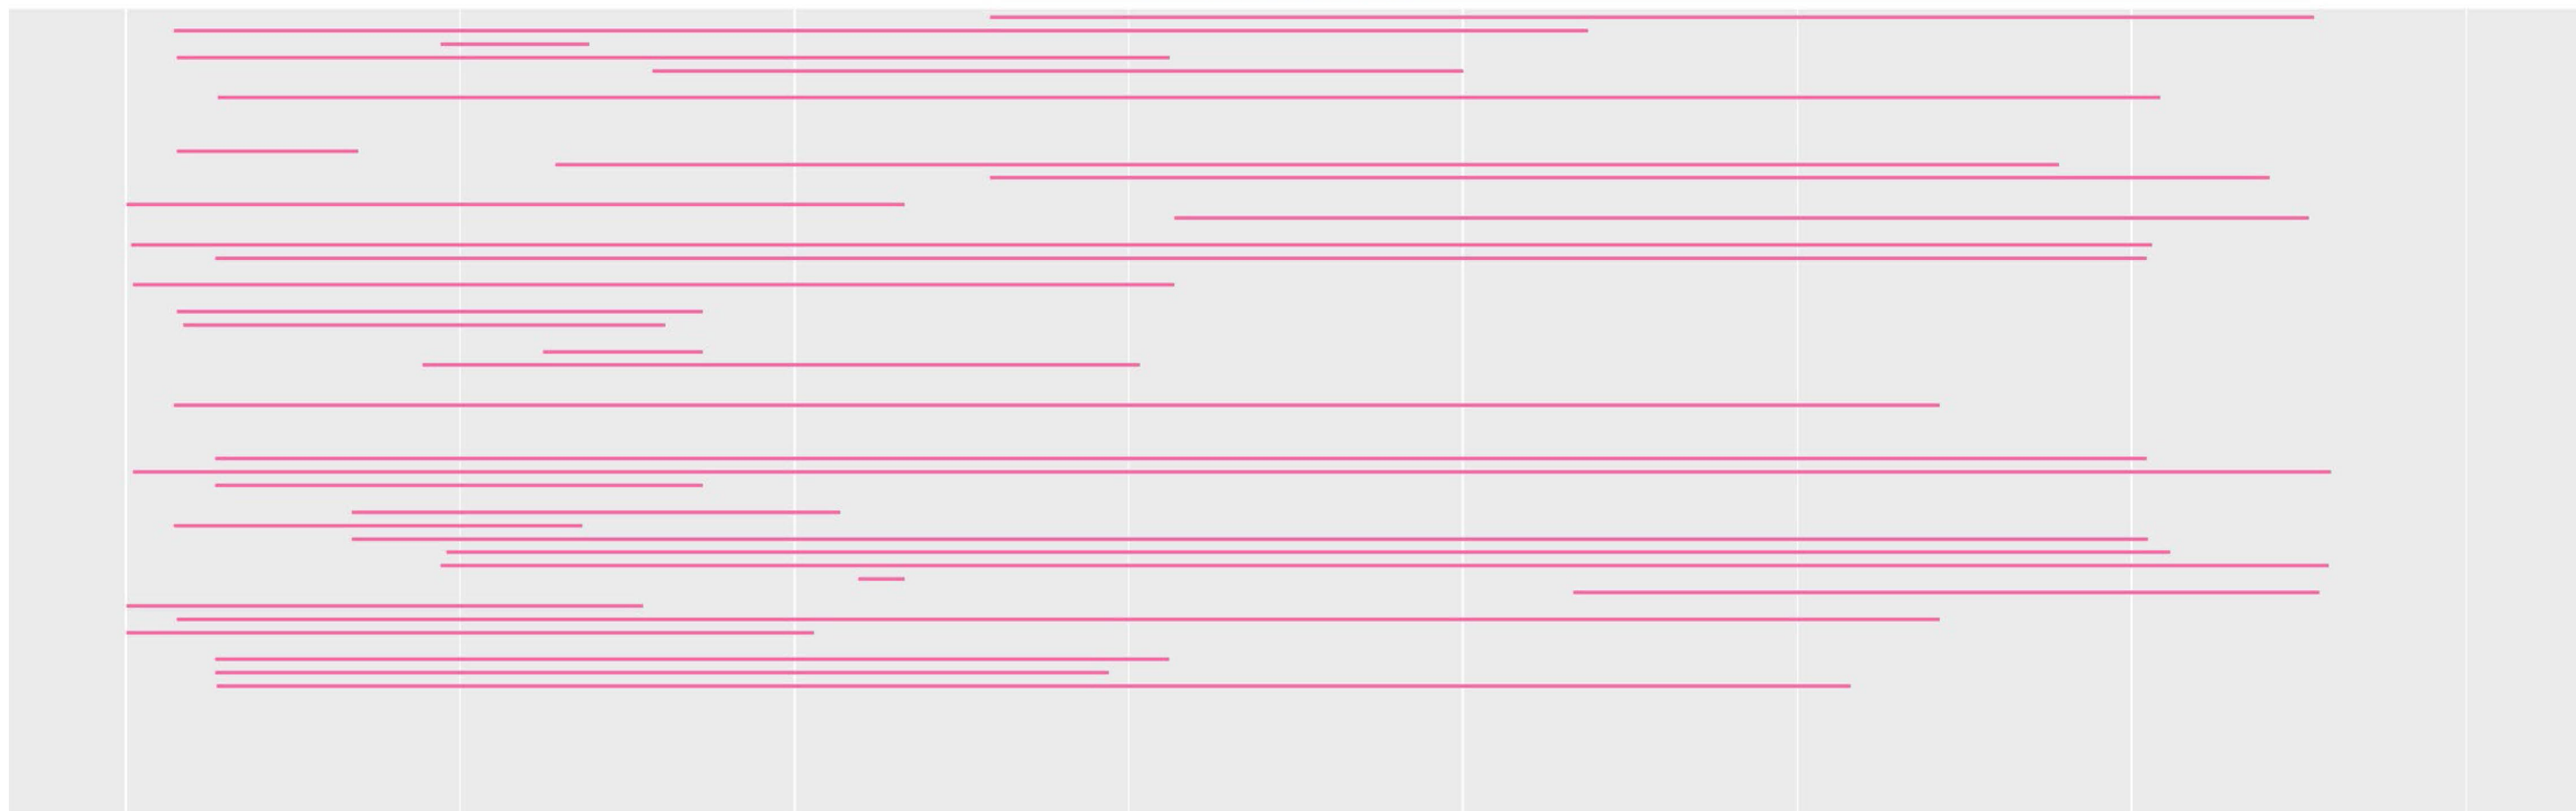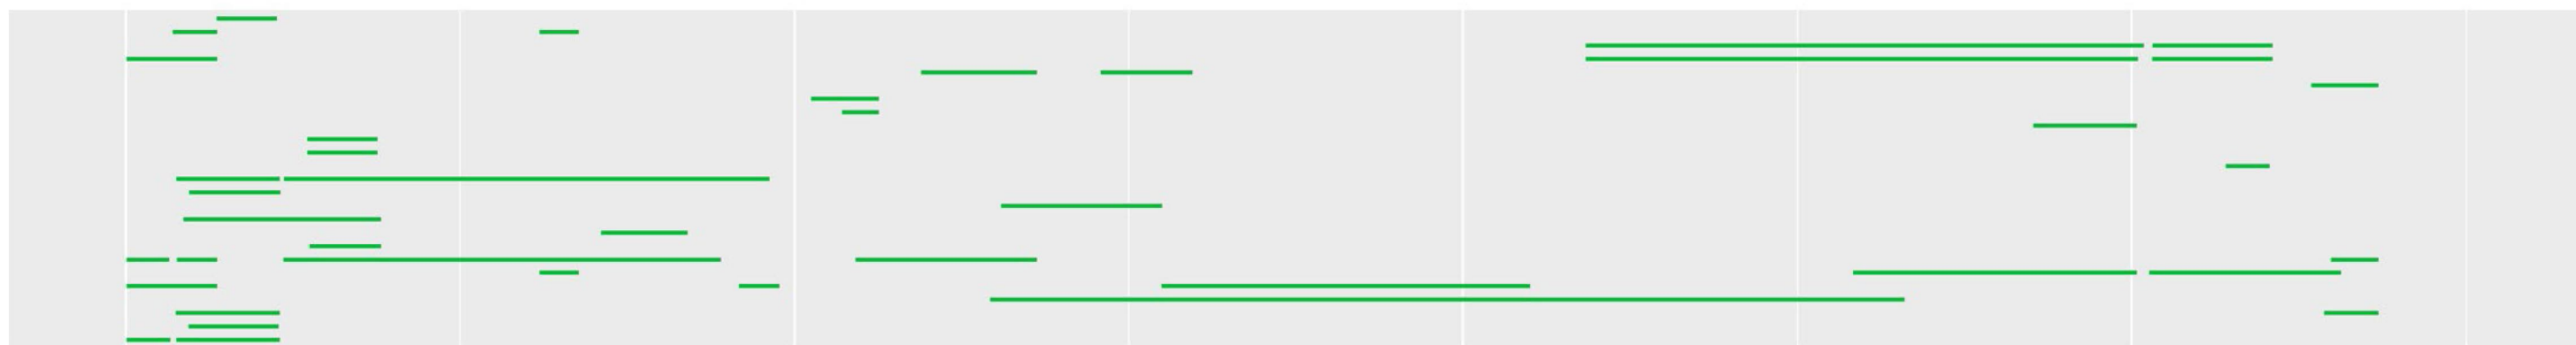

Chromosome length (Mb)

POP A POP B POP C

Chromosome Okis02

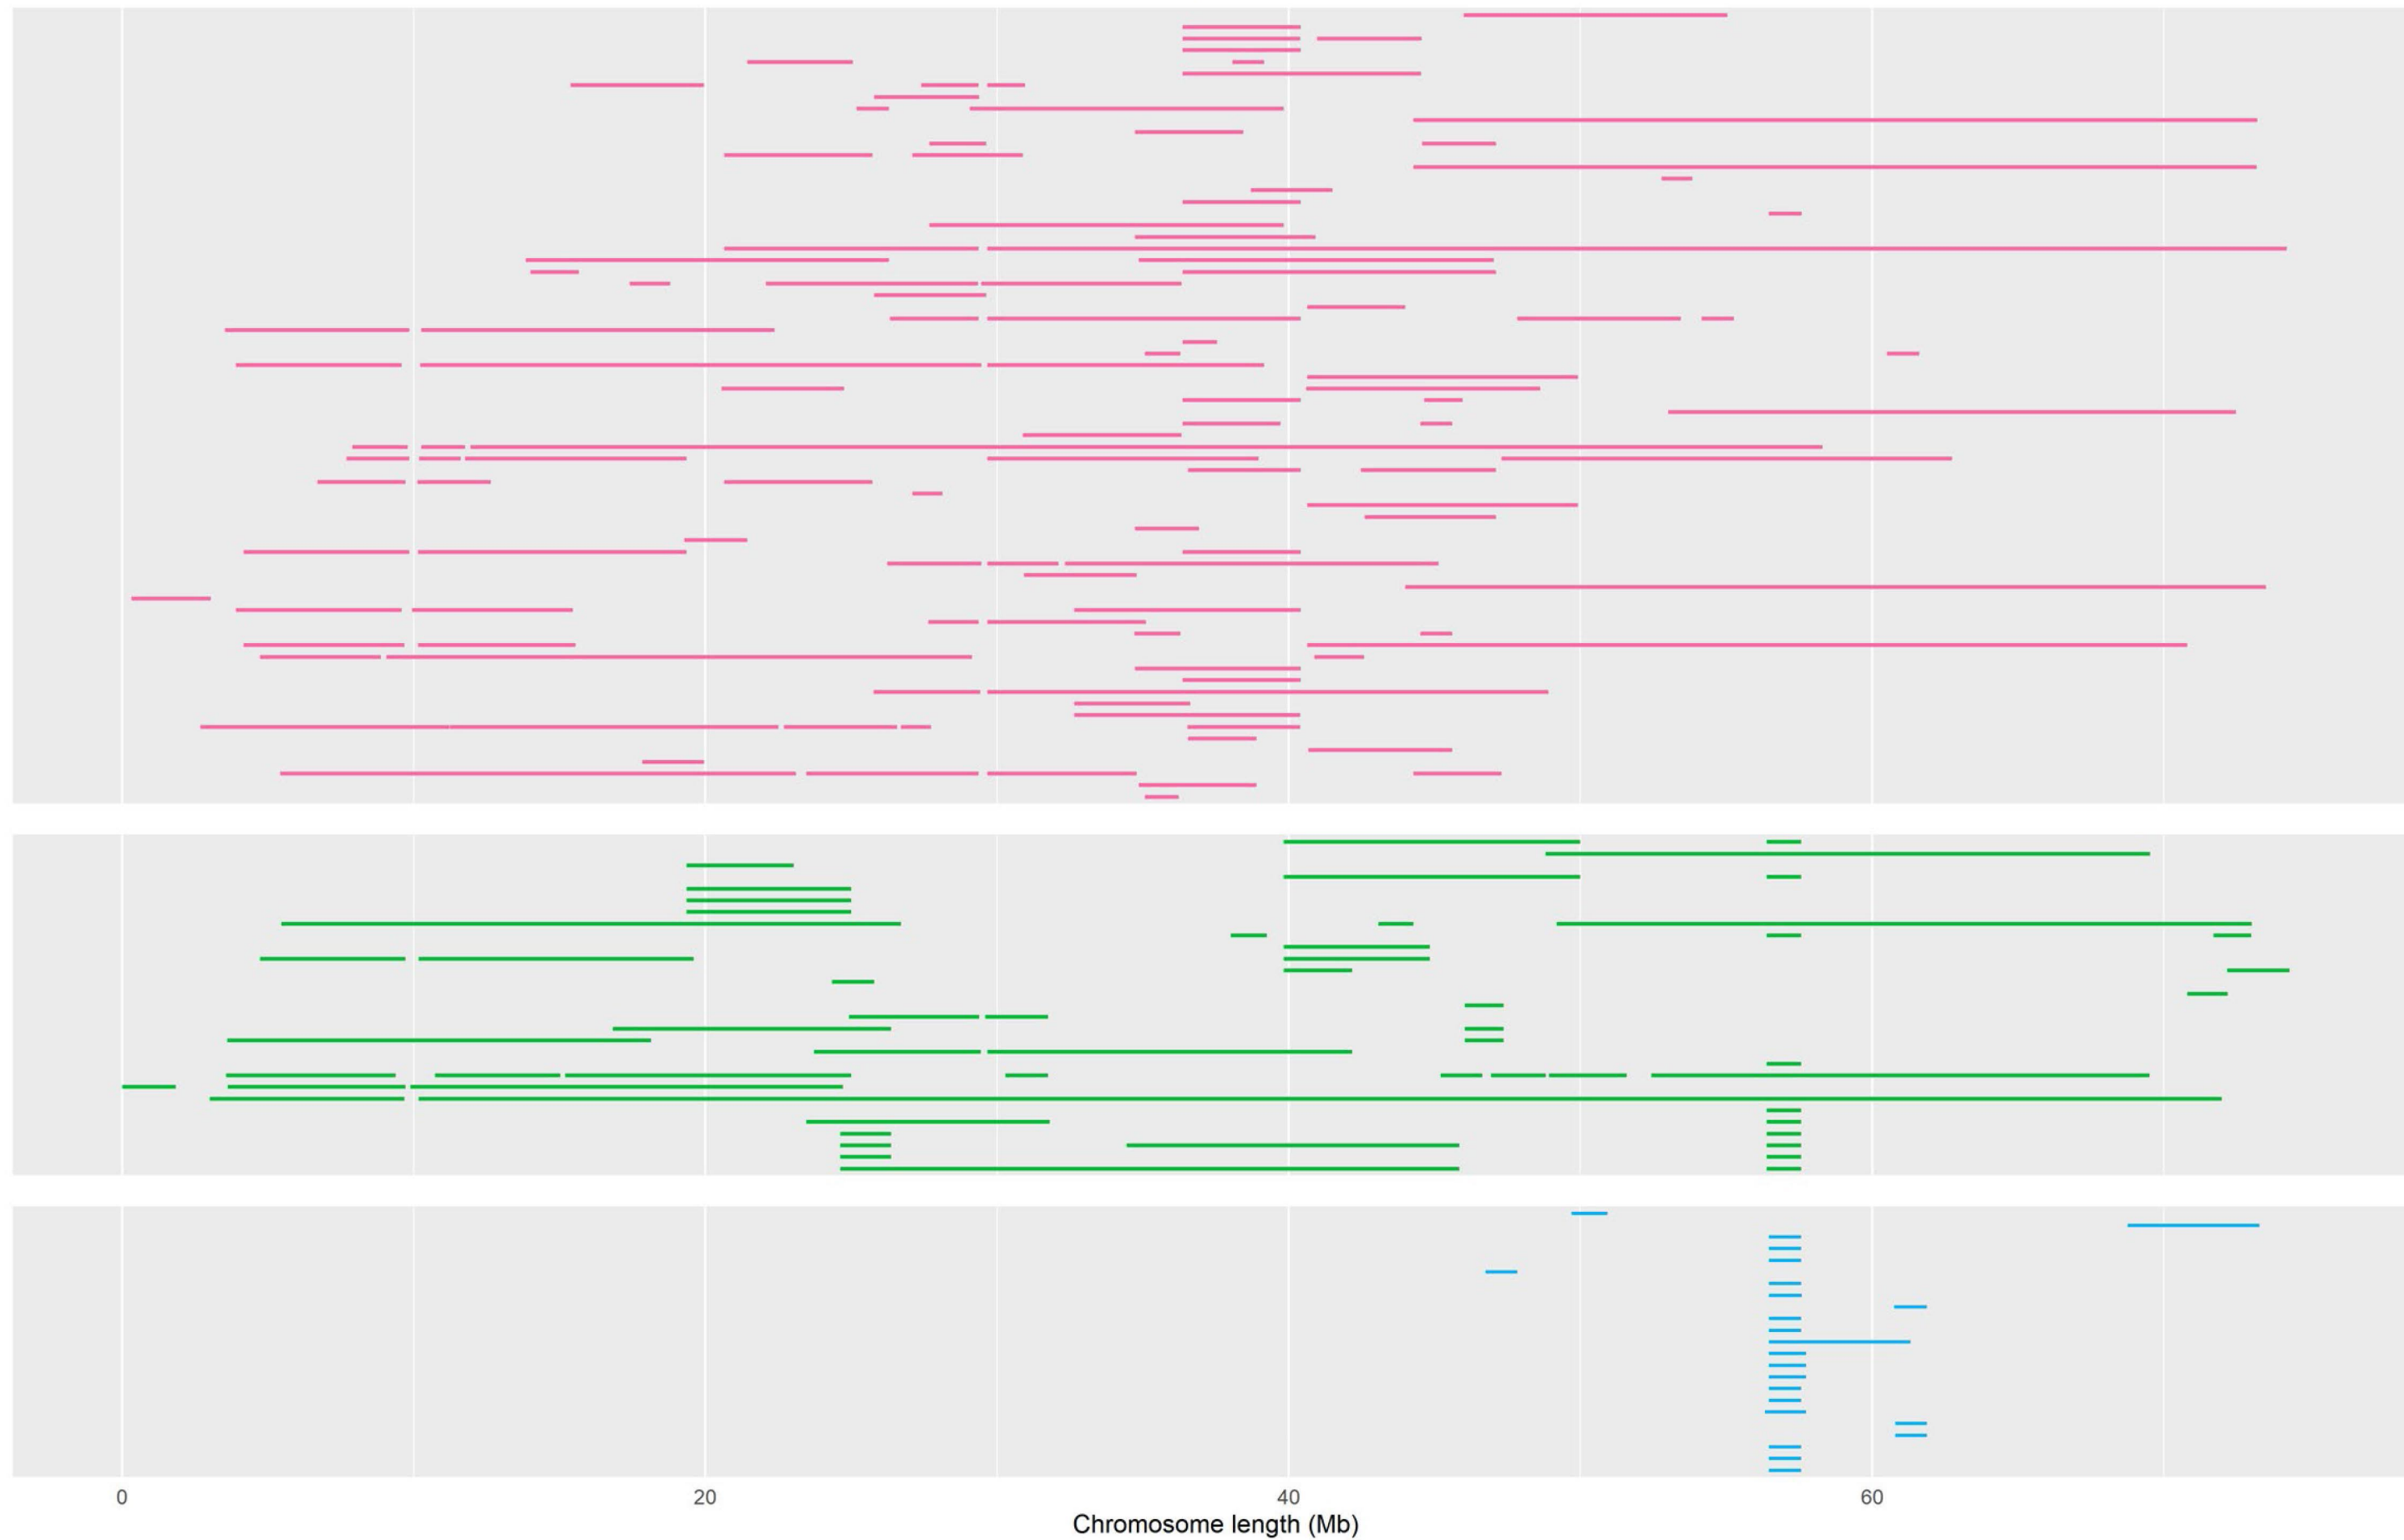

POP A POP B POP C

# Chromosome Okis03

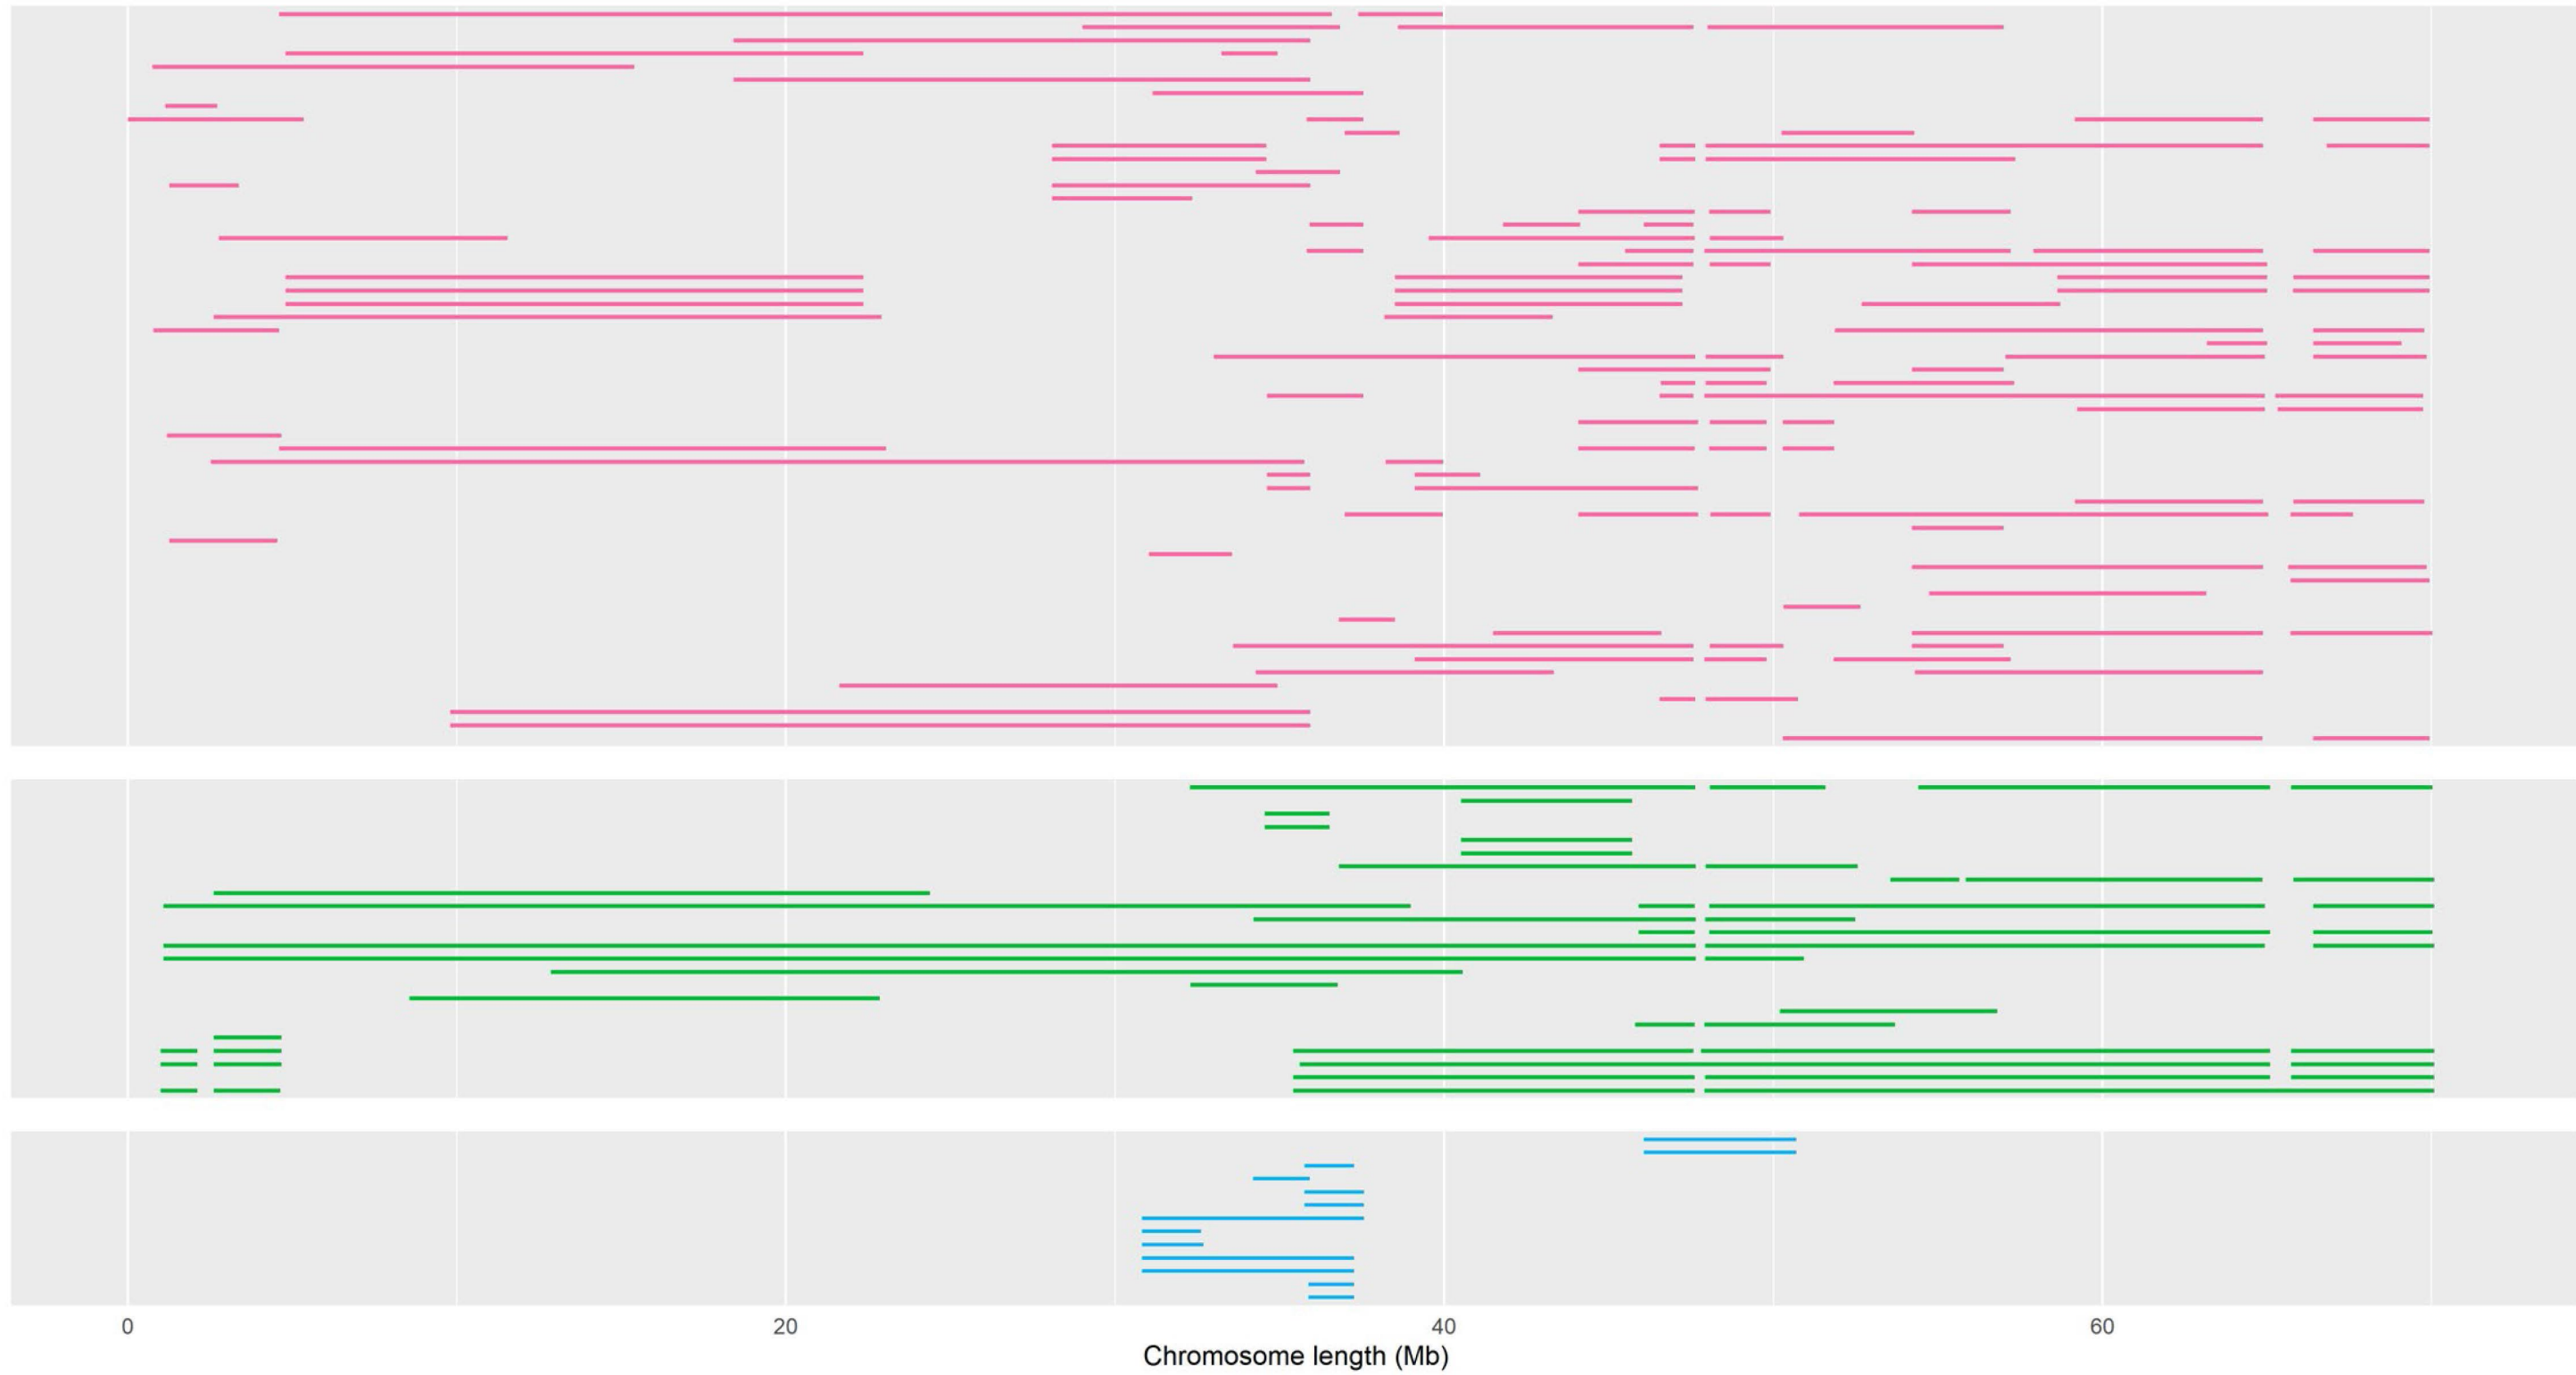

POP A POP B POP C

Chromosome Okis04

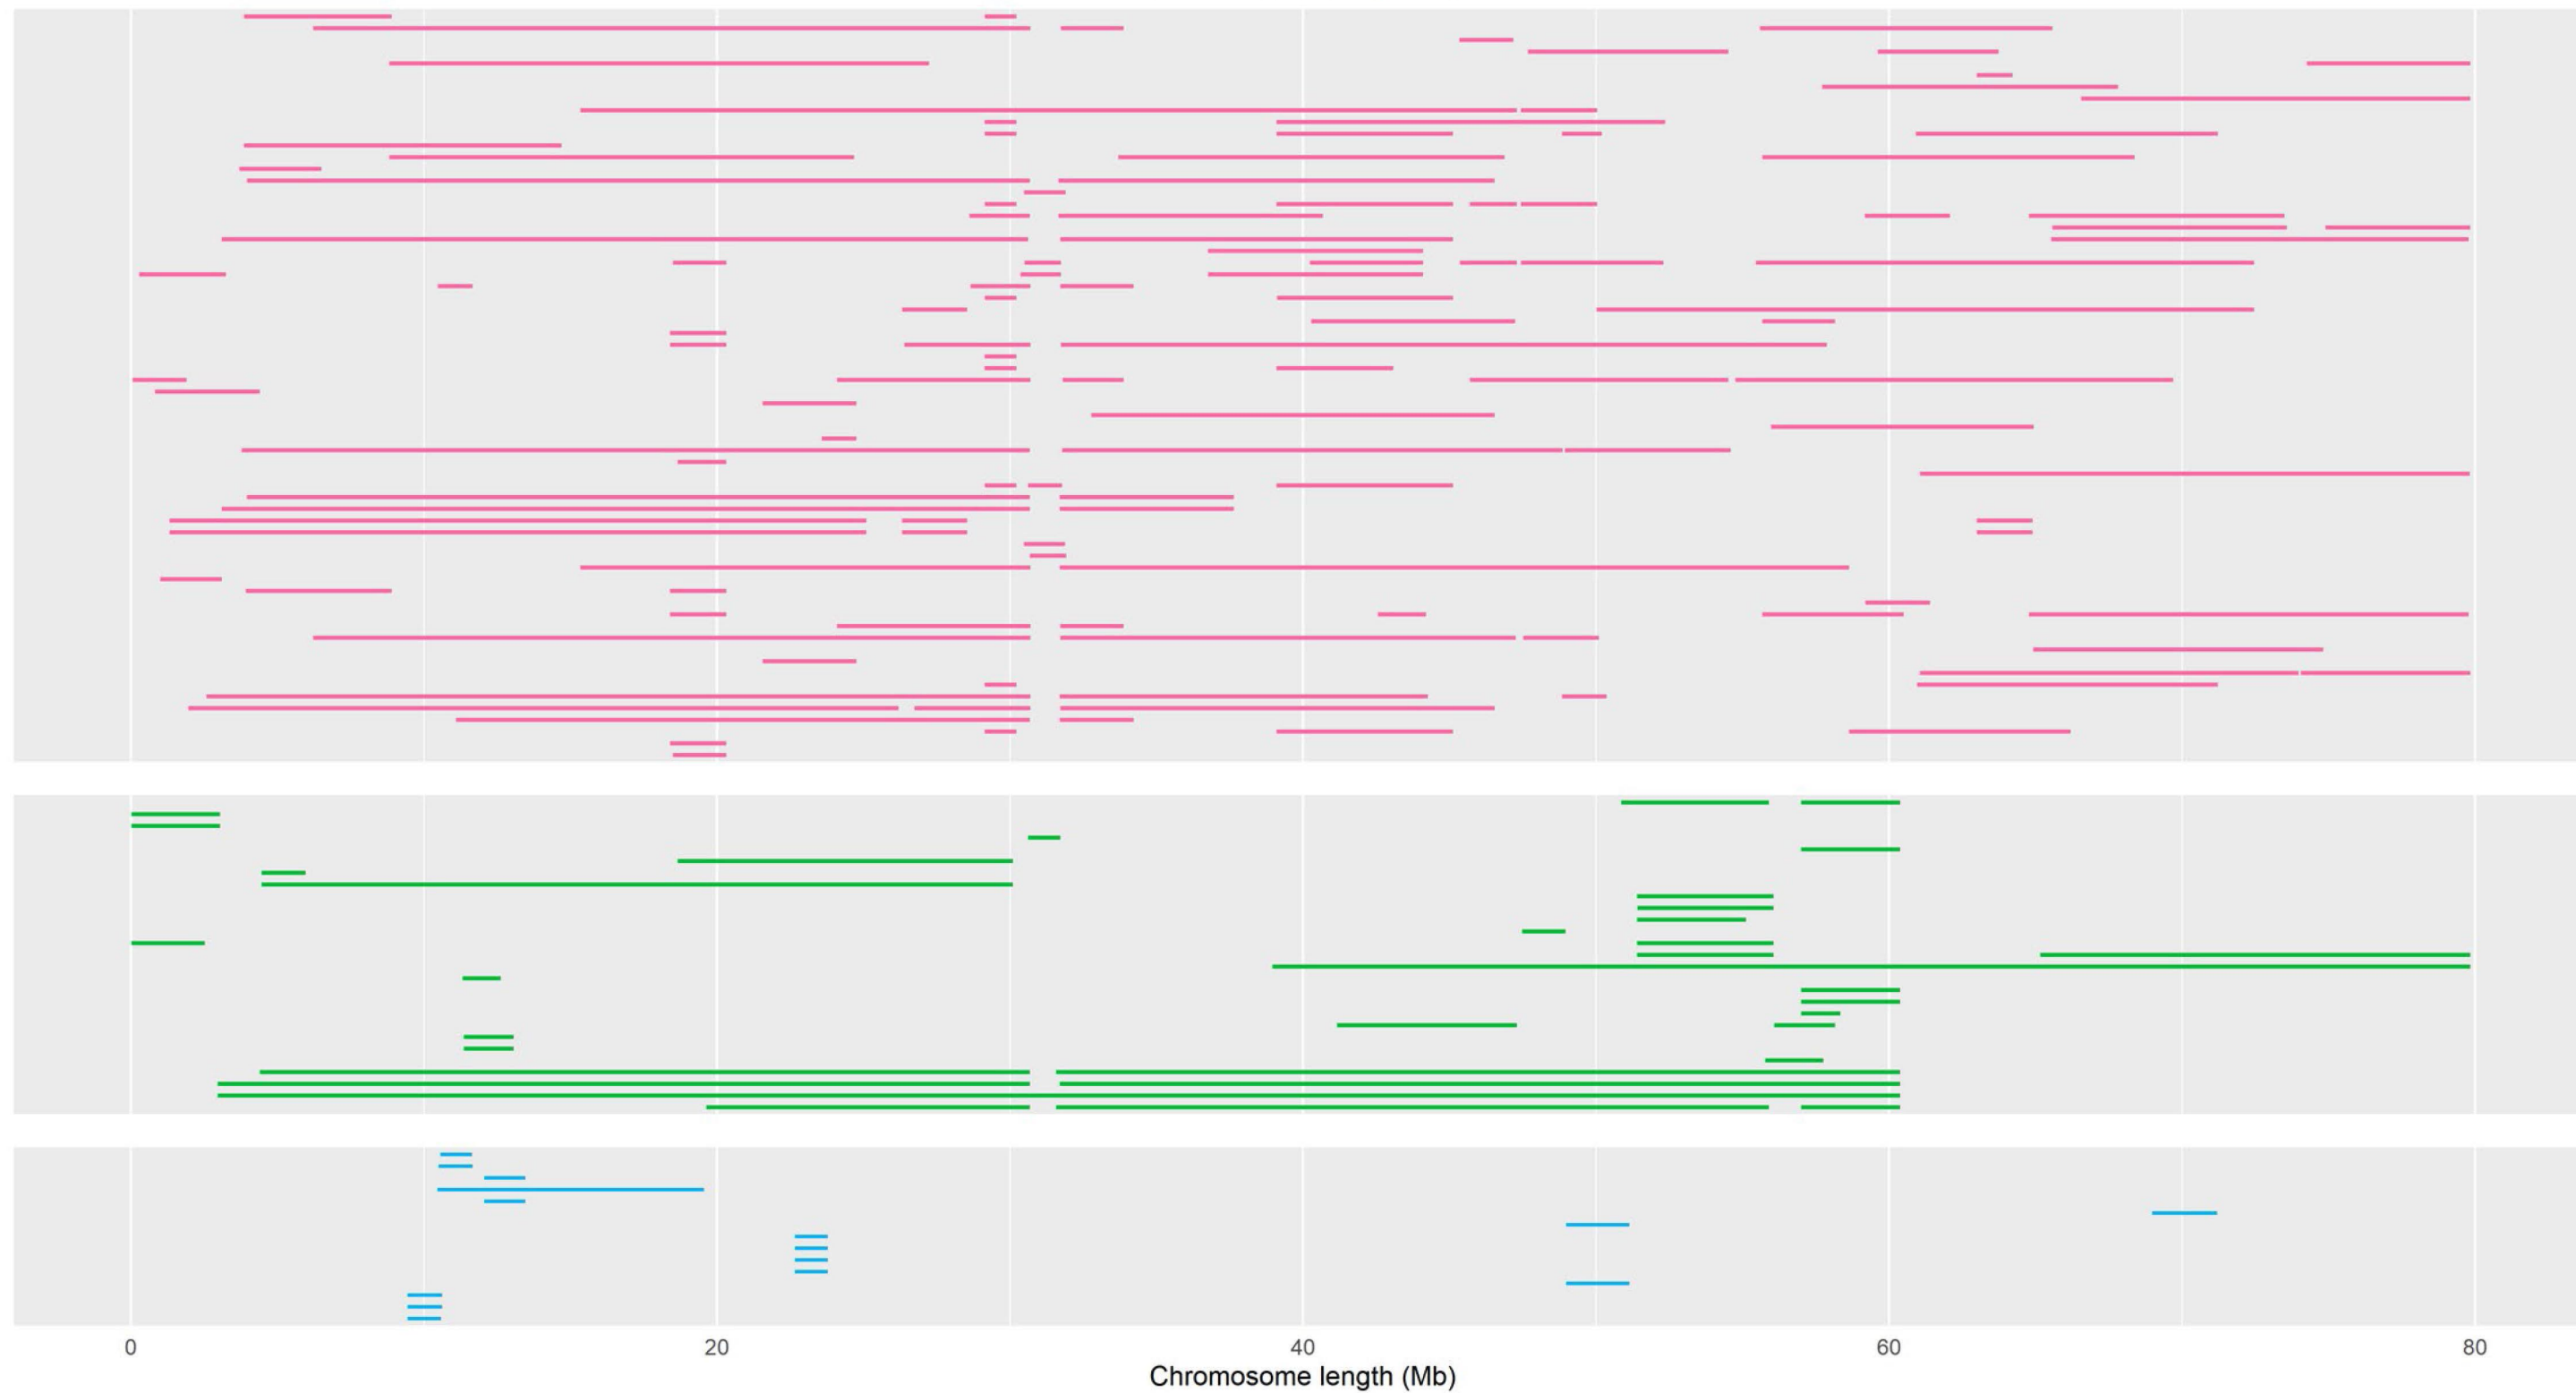

POP A POP B POP C



Chromosome Okis05

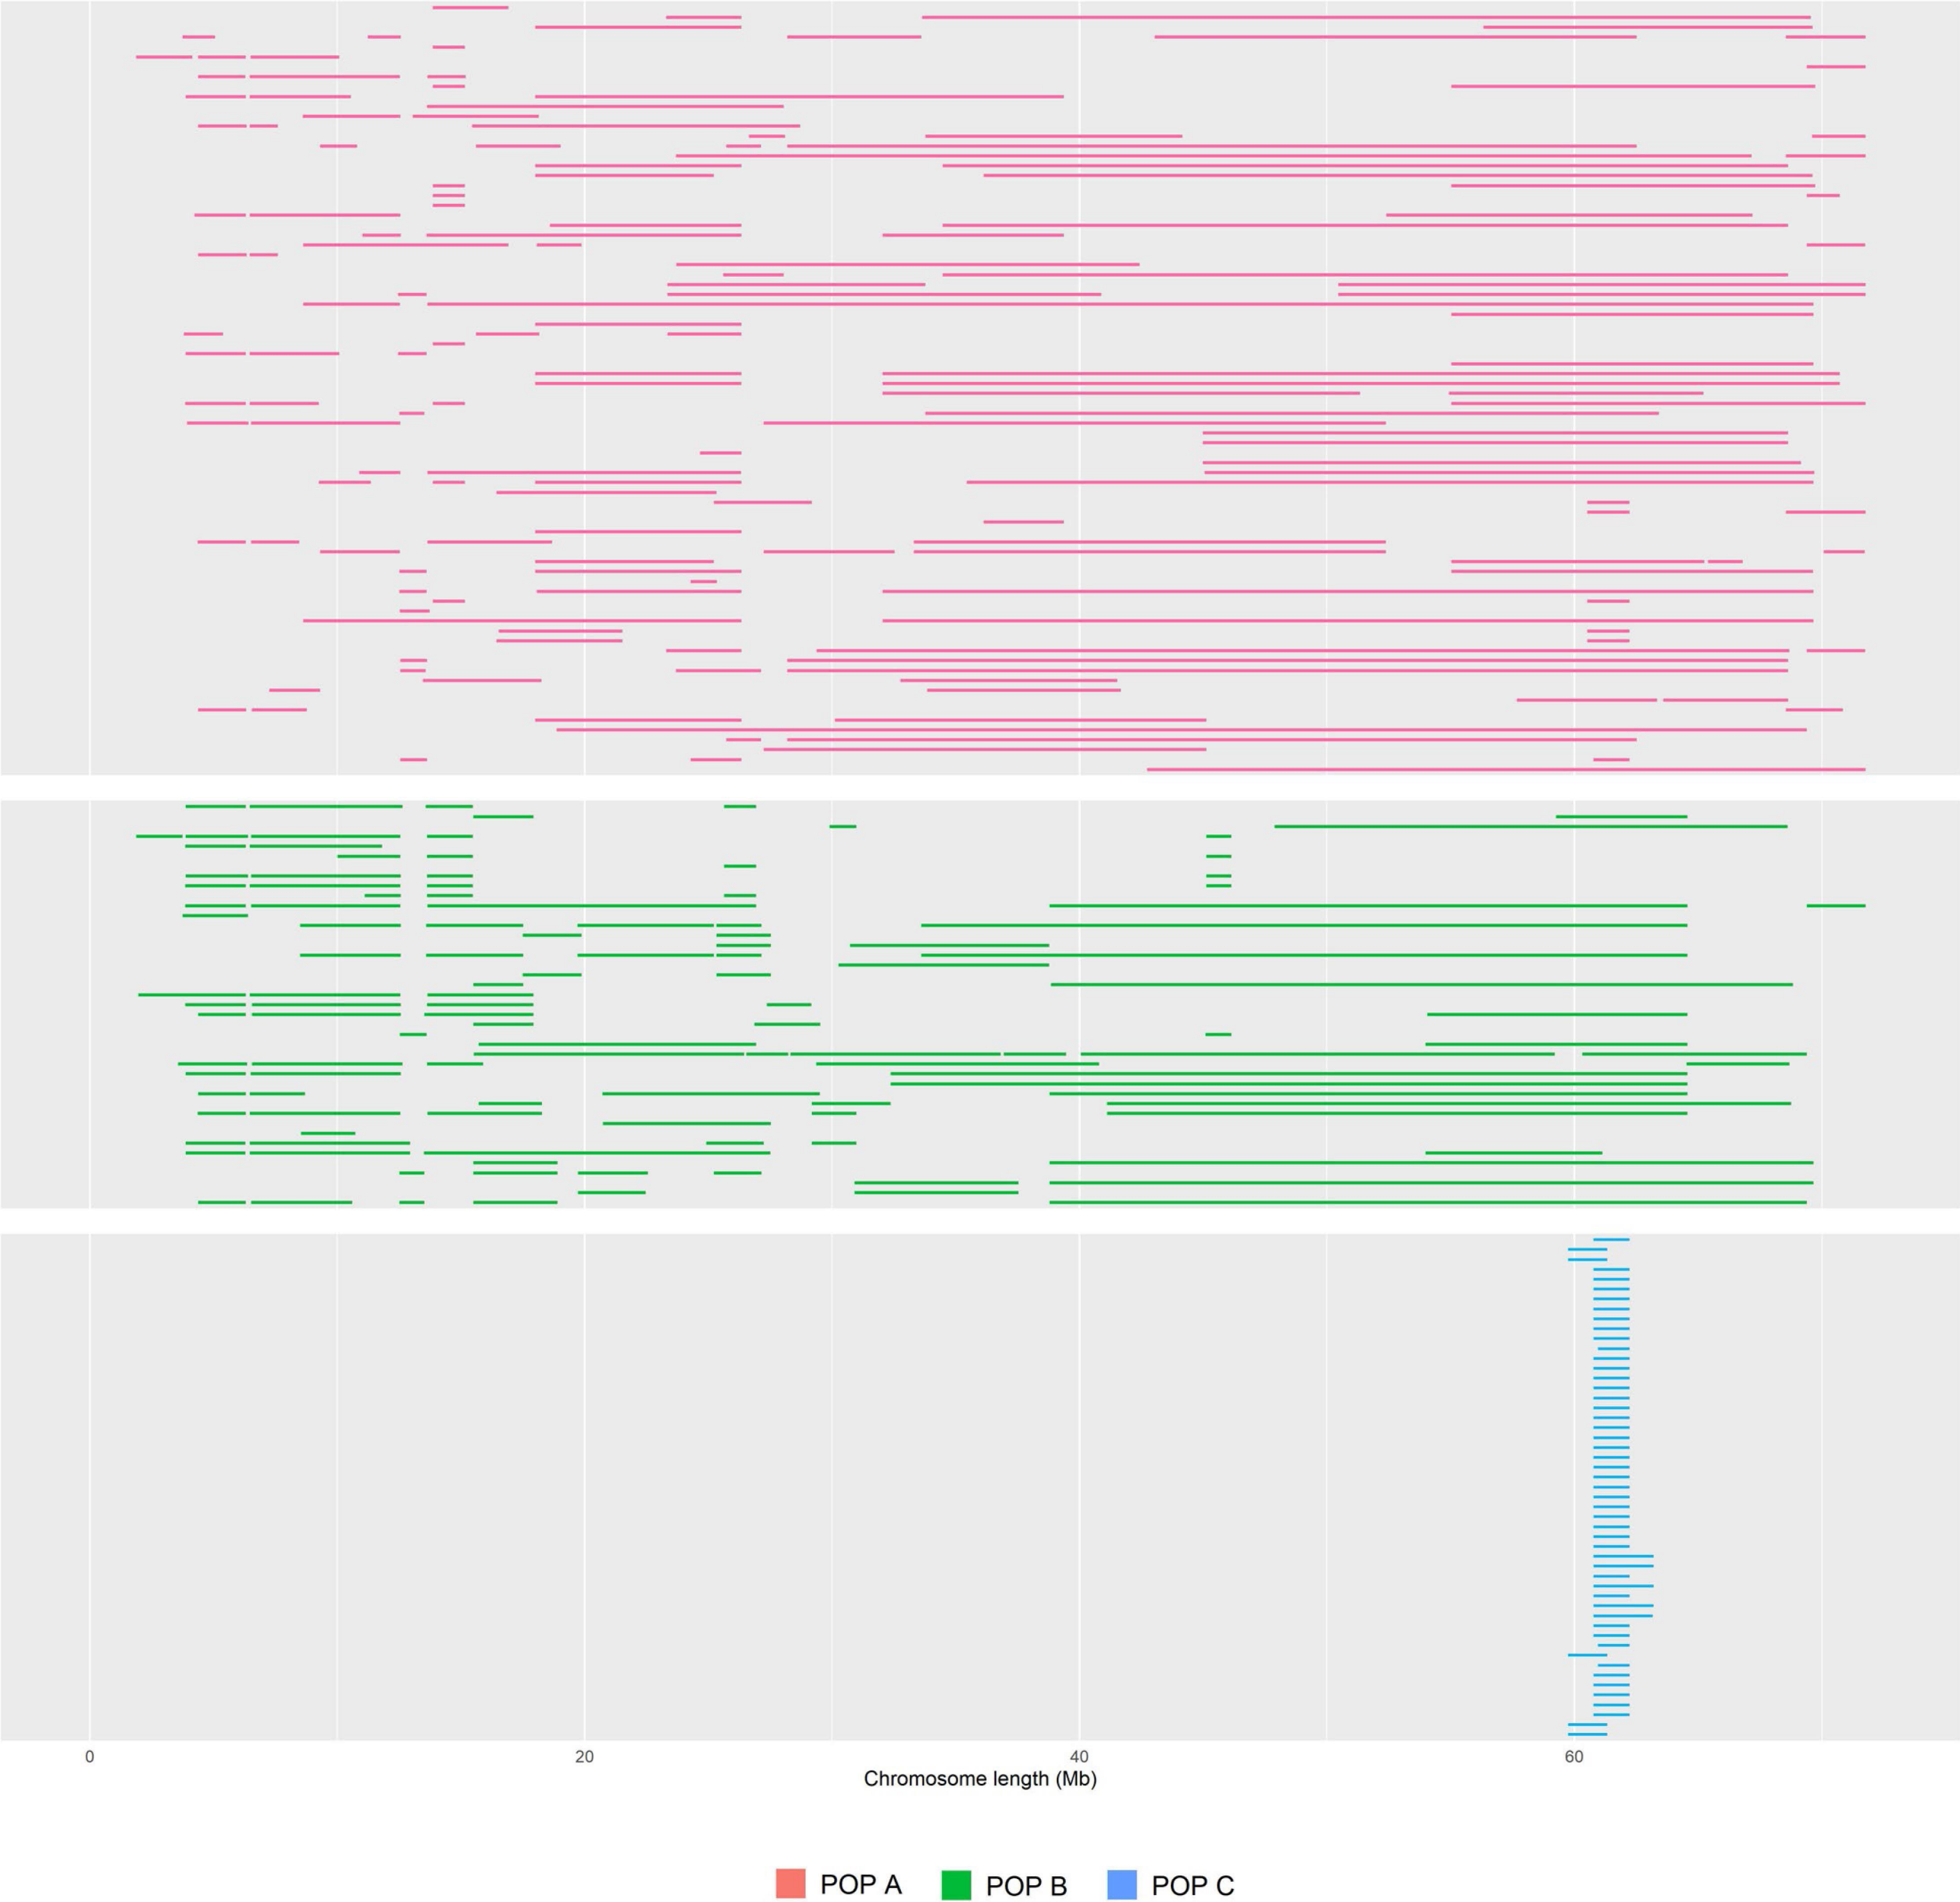

Chromosome Okis06

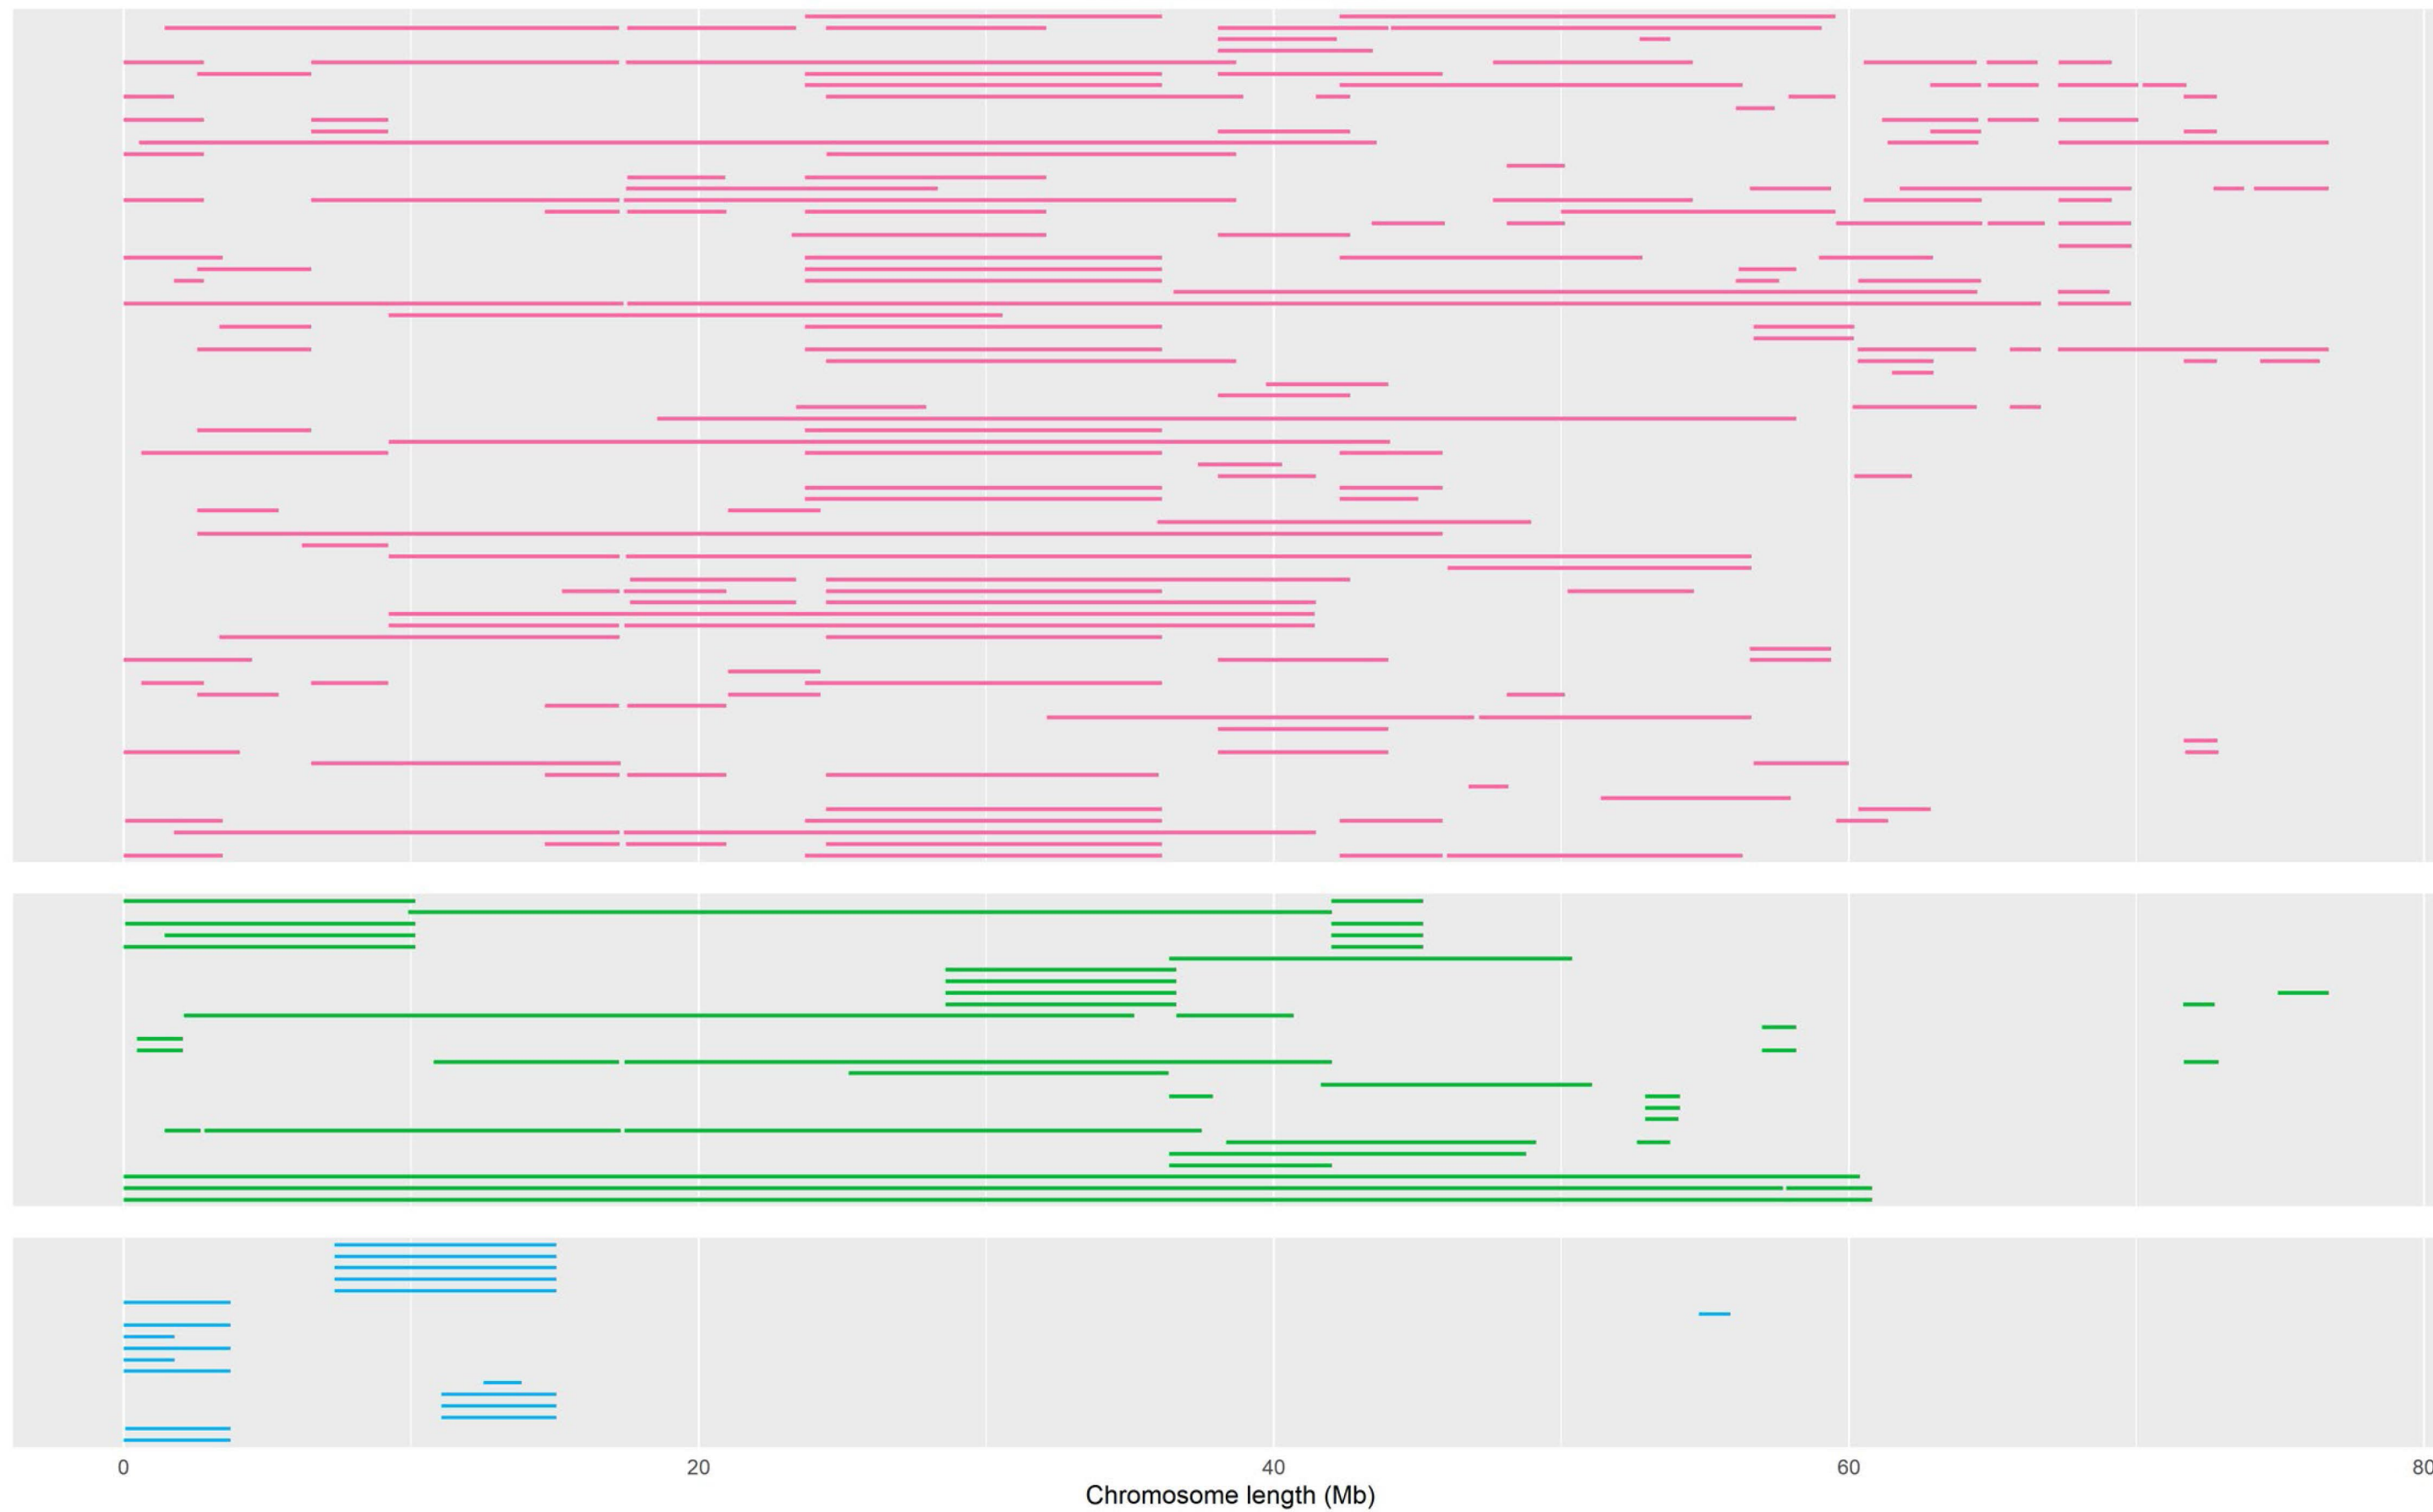

POP A POP B POP C

Chromosome Okis07

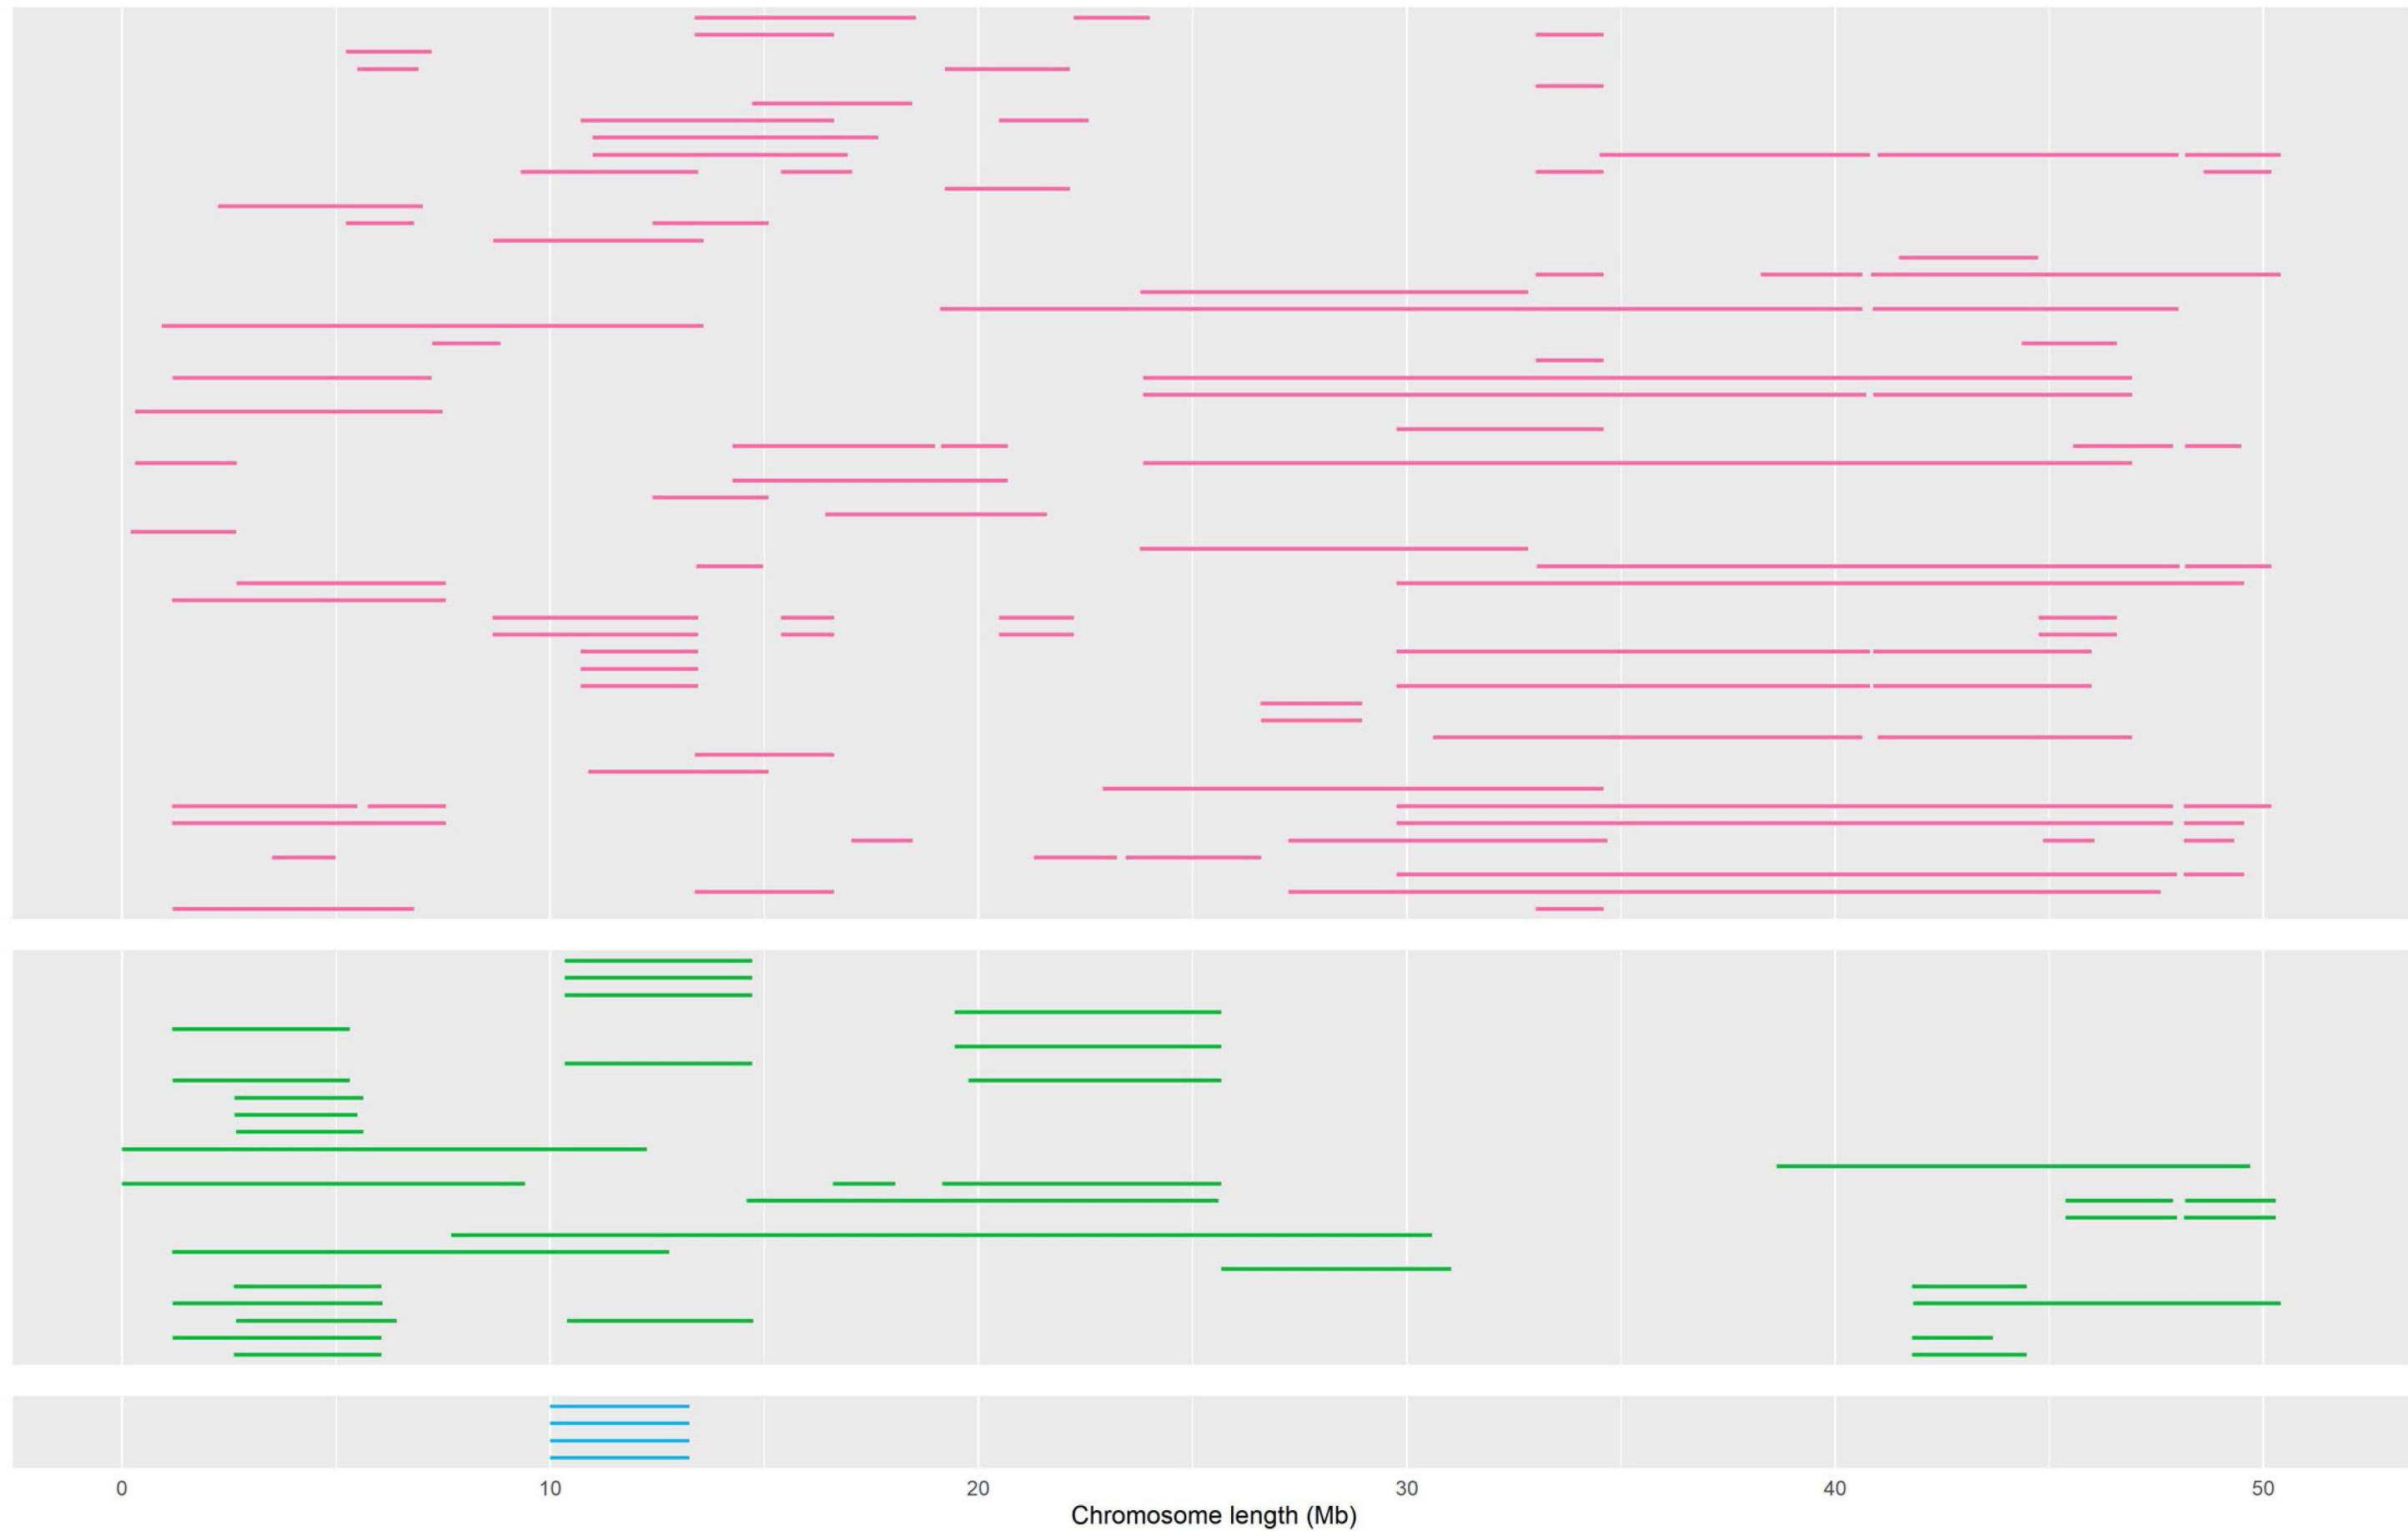

Chromosome Okis08

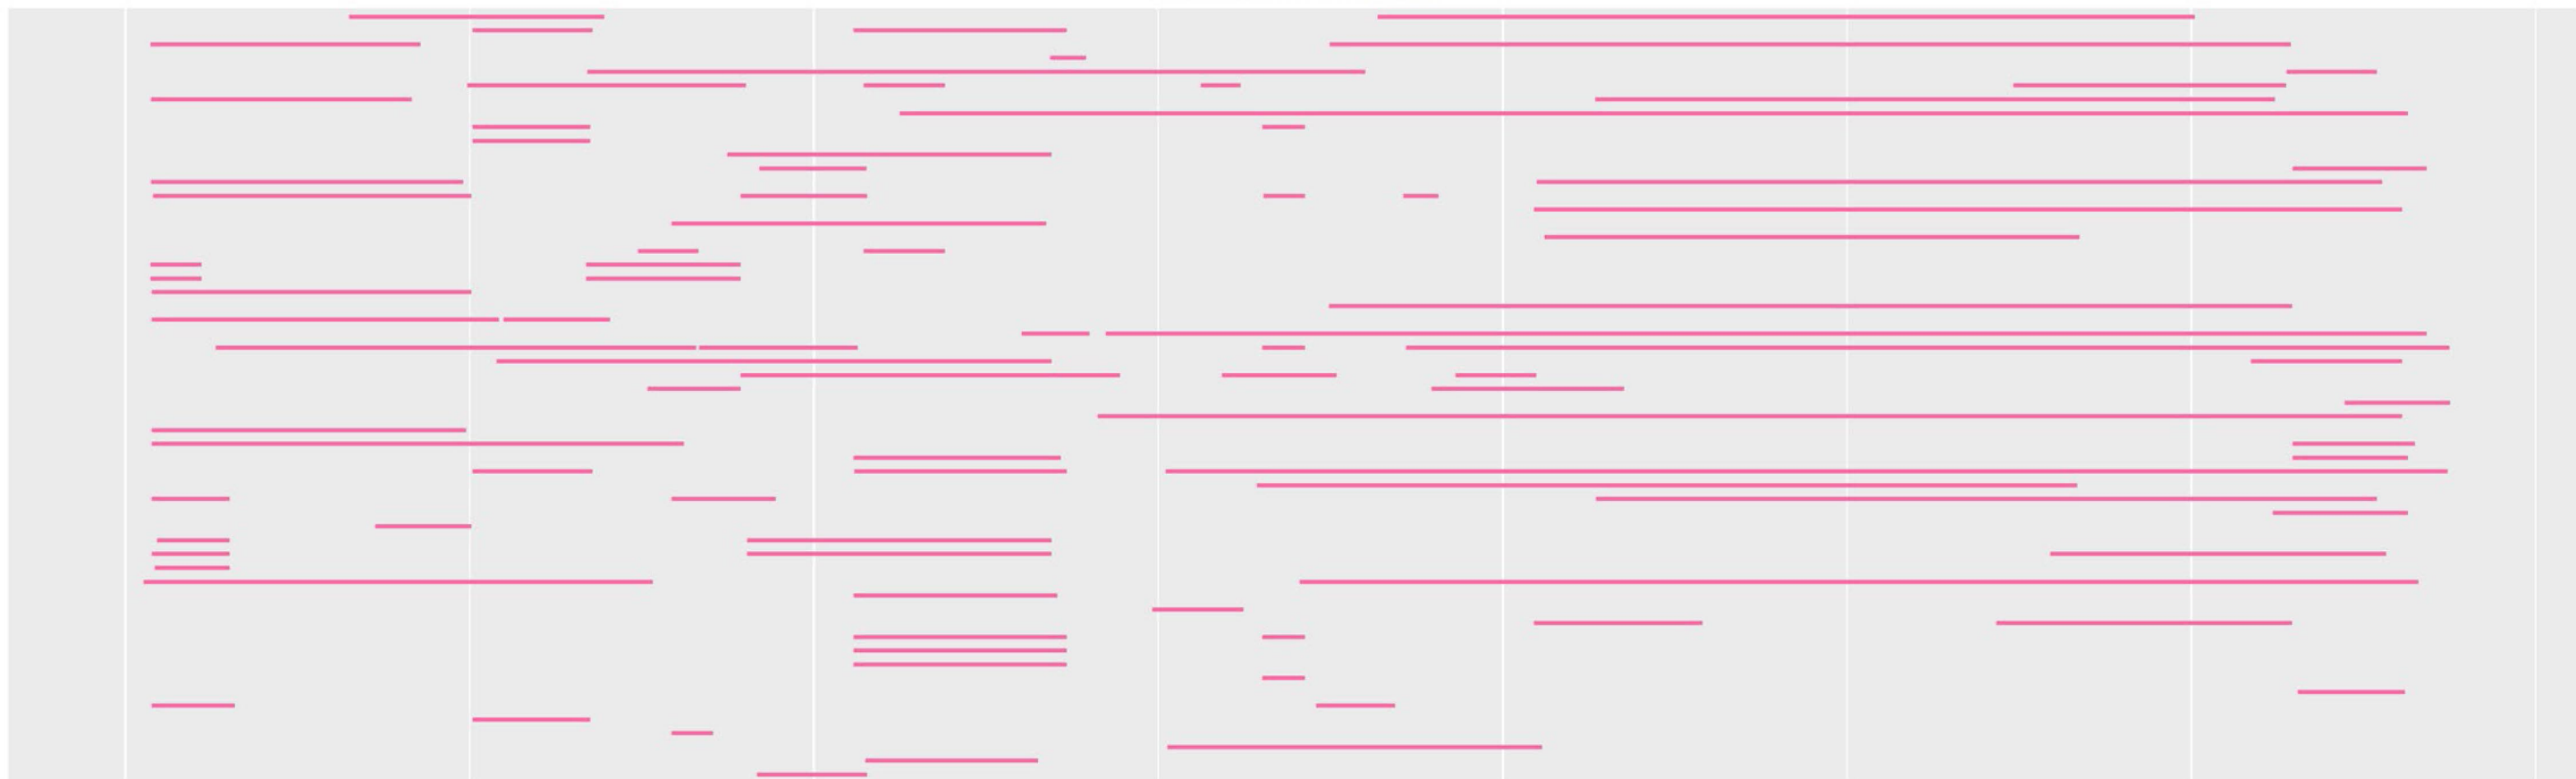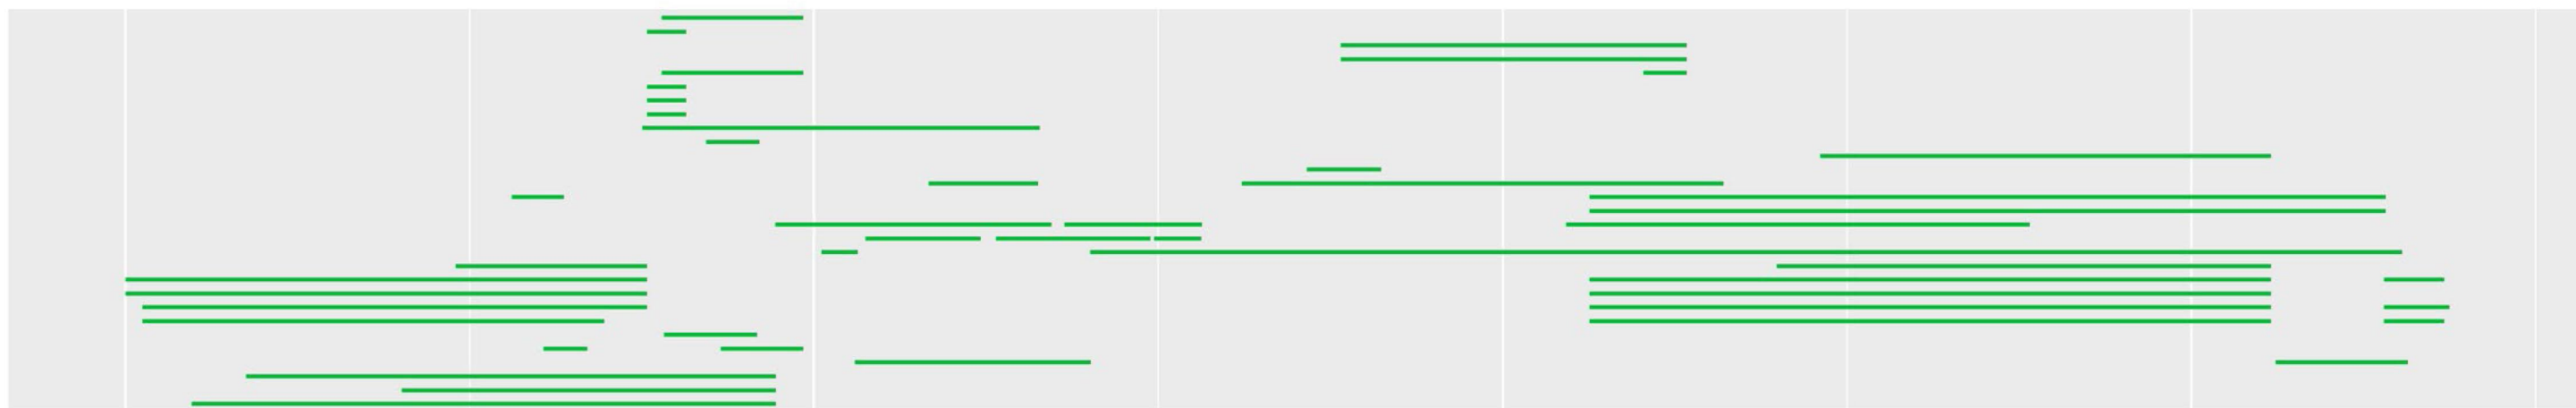

0

20

Chromosome length (Mb)

40

60

POP A POP B POP C

Chromosome Okis09

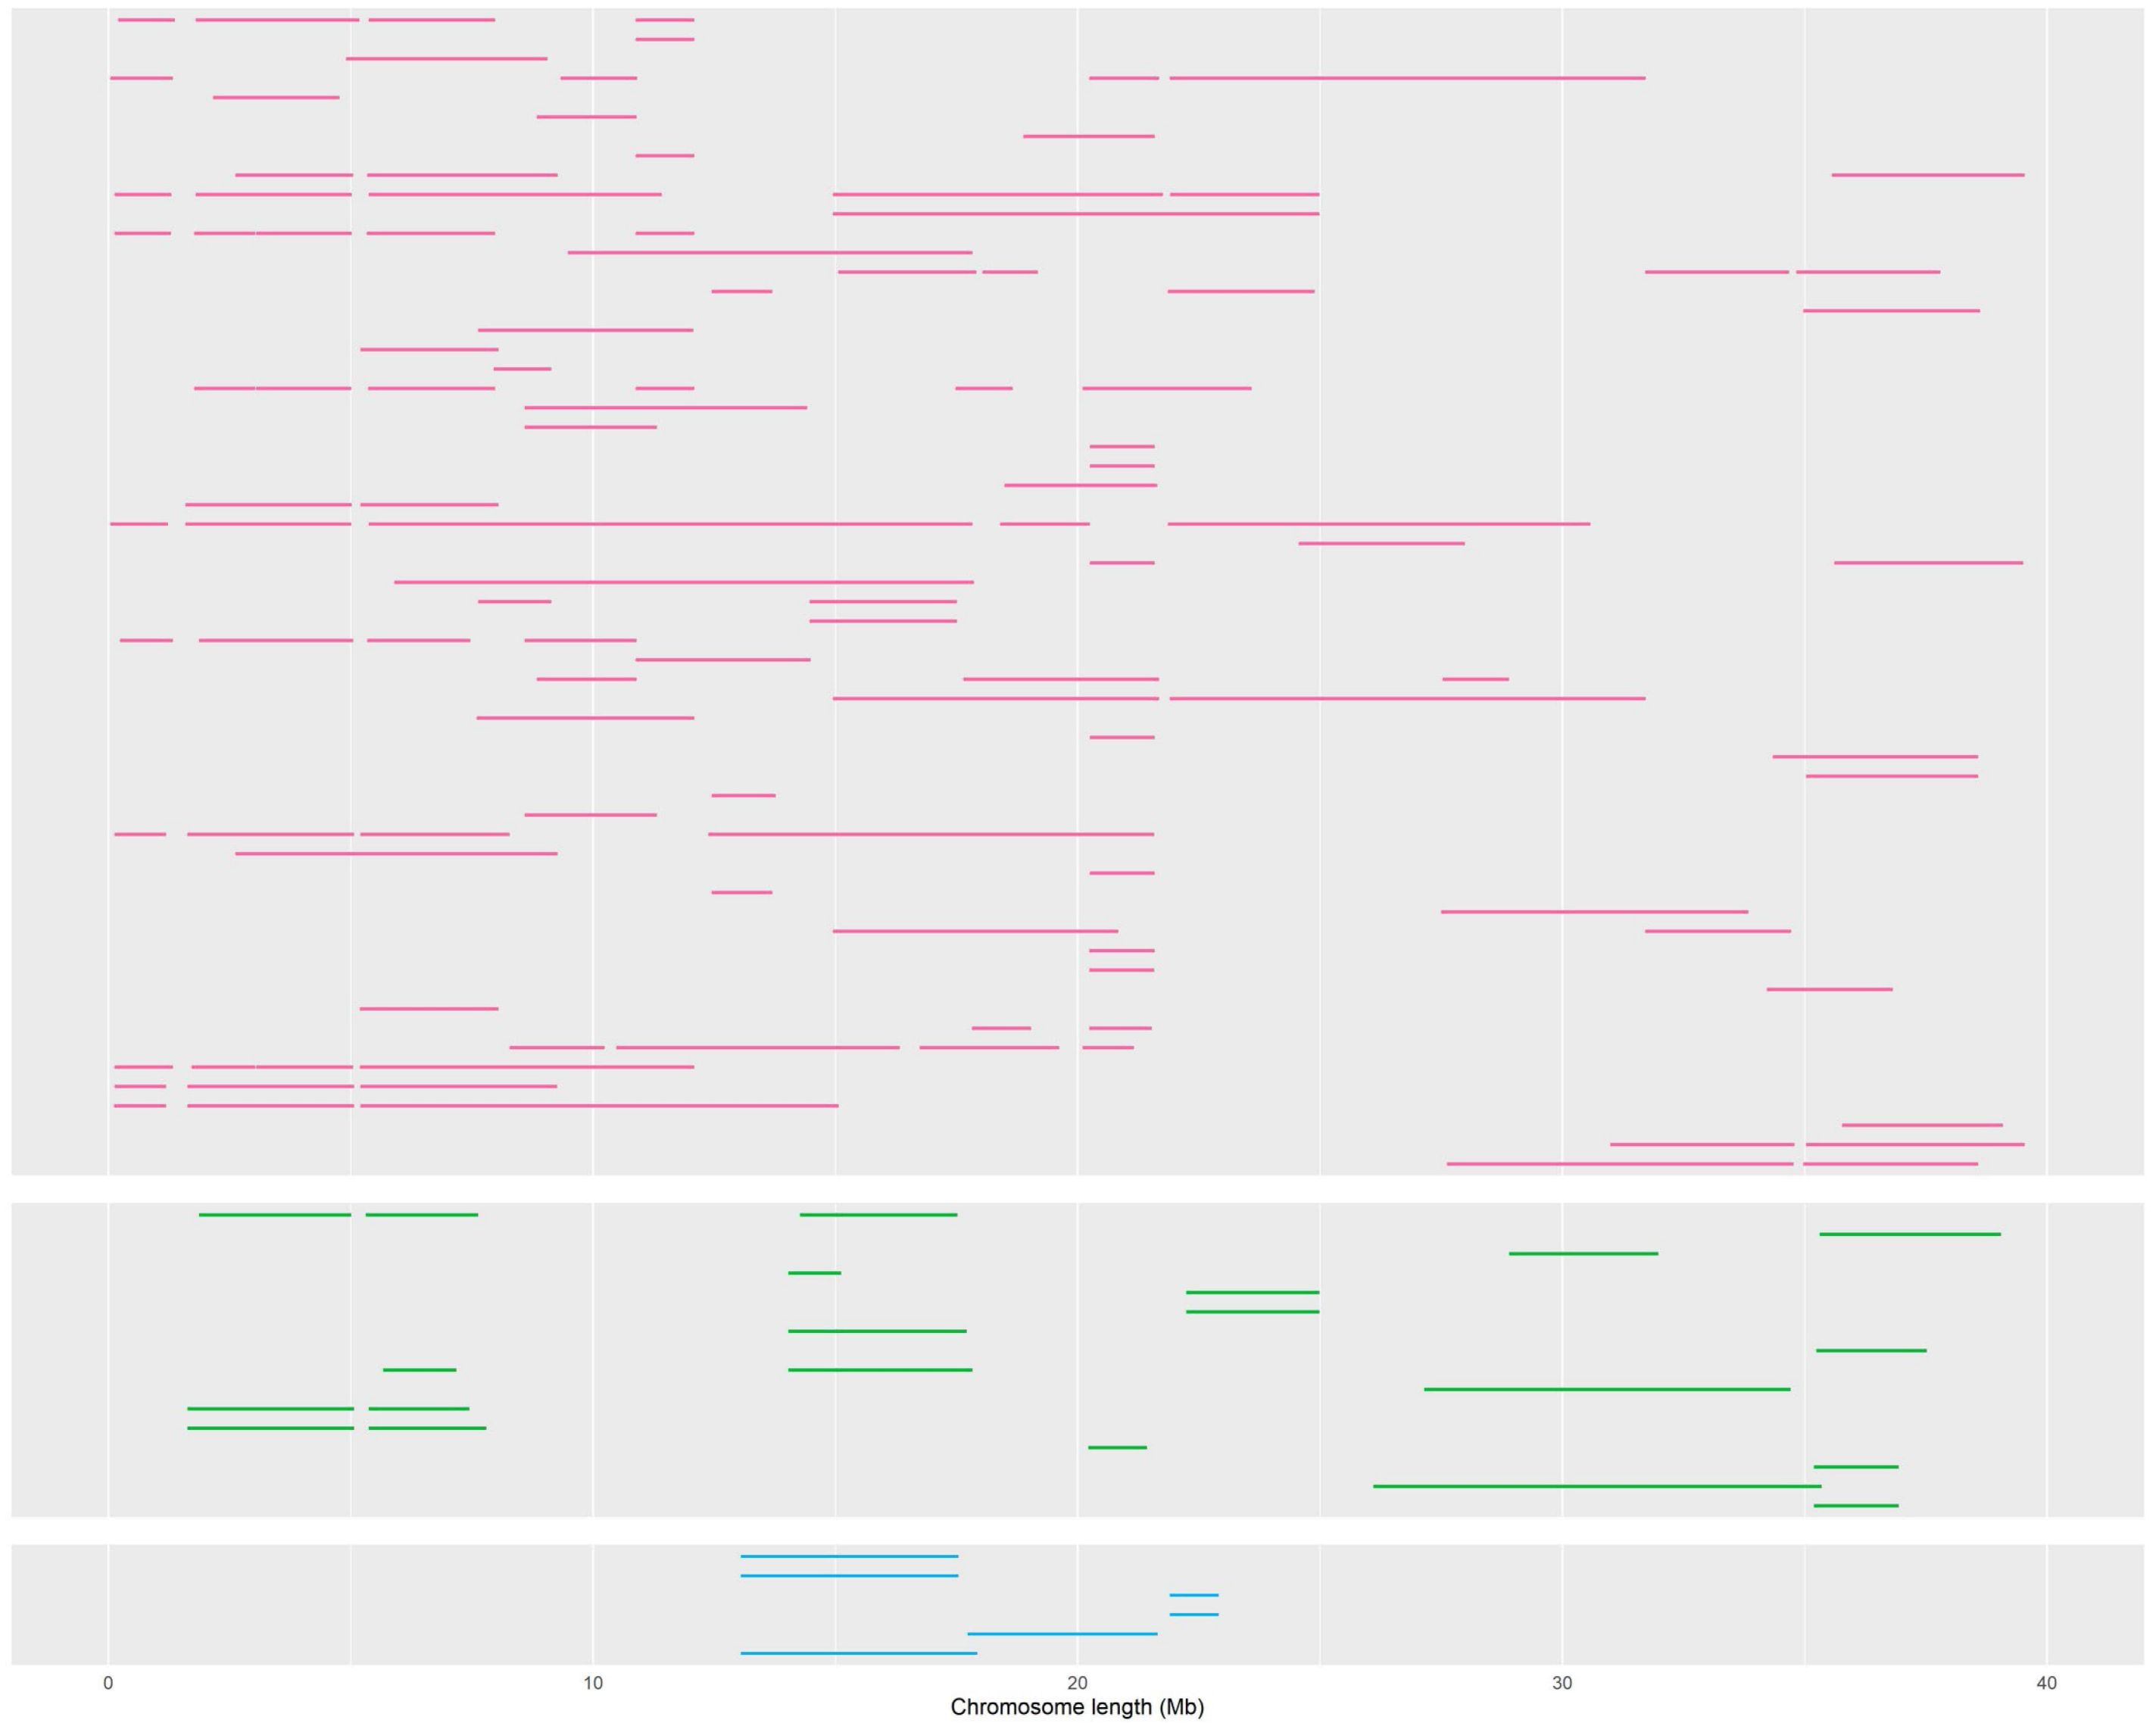

POP A POP B POP C

# Chromosome Okis10

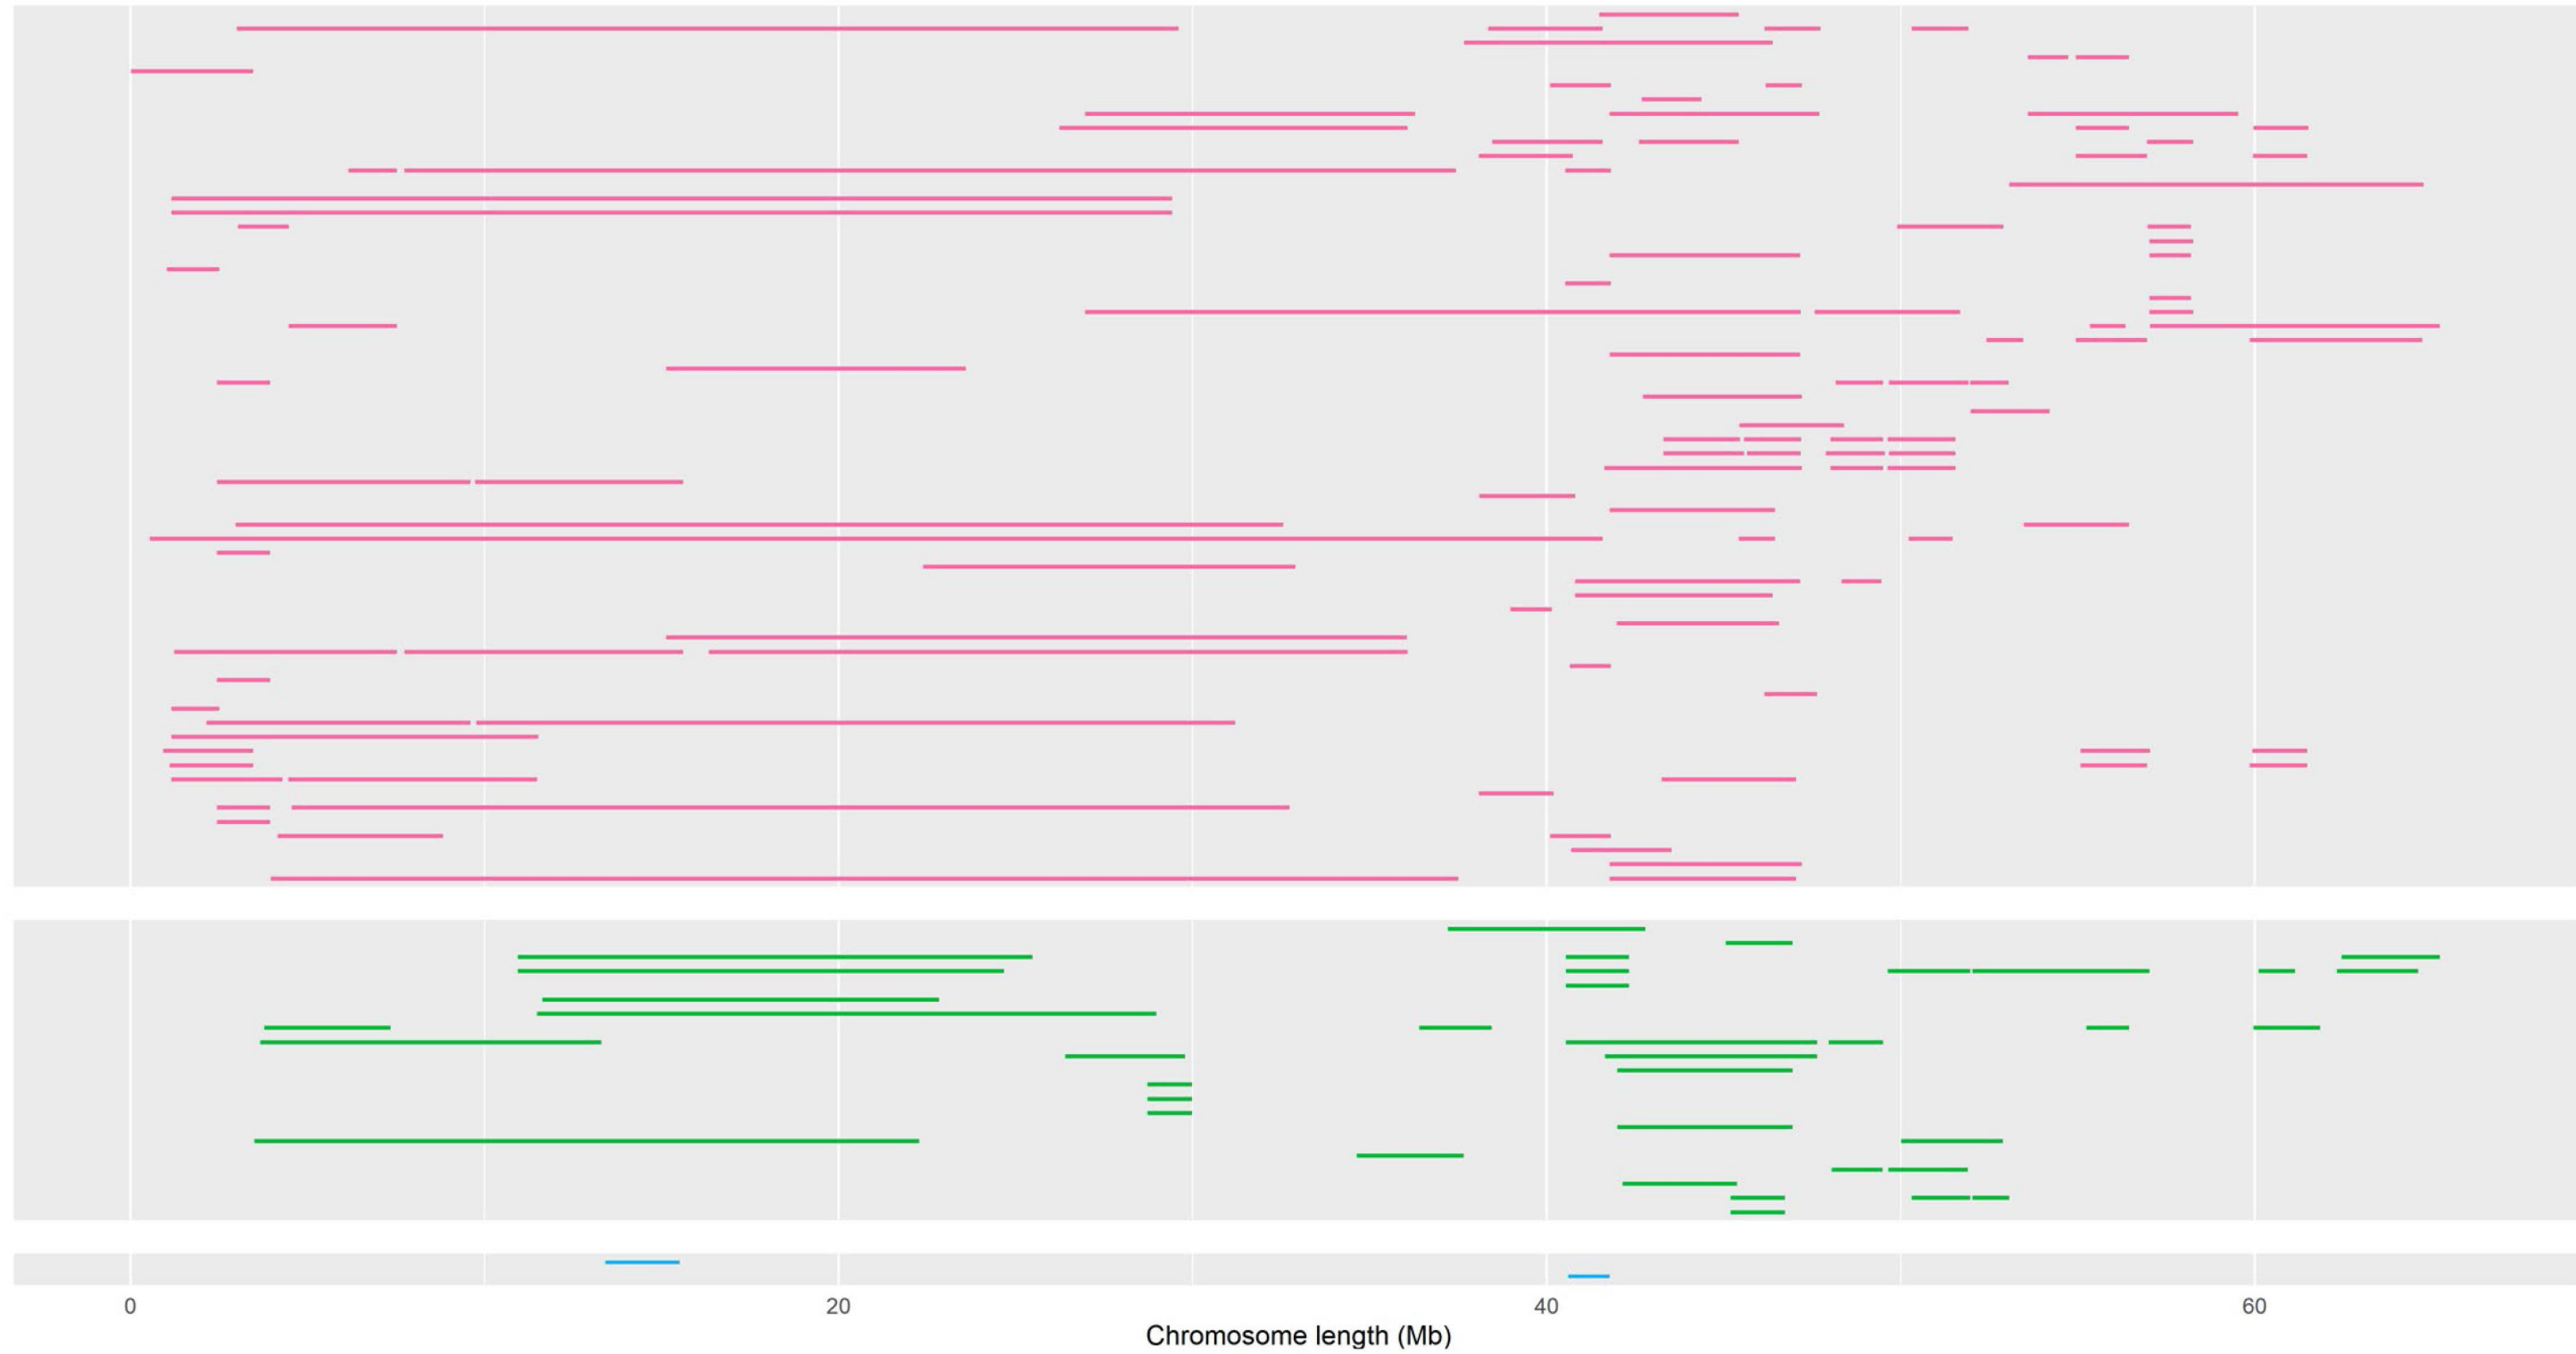

# Chromosome Okis11

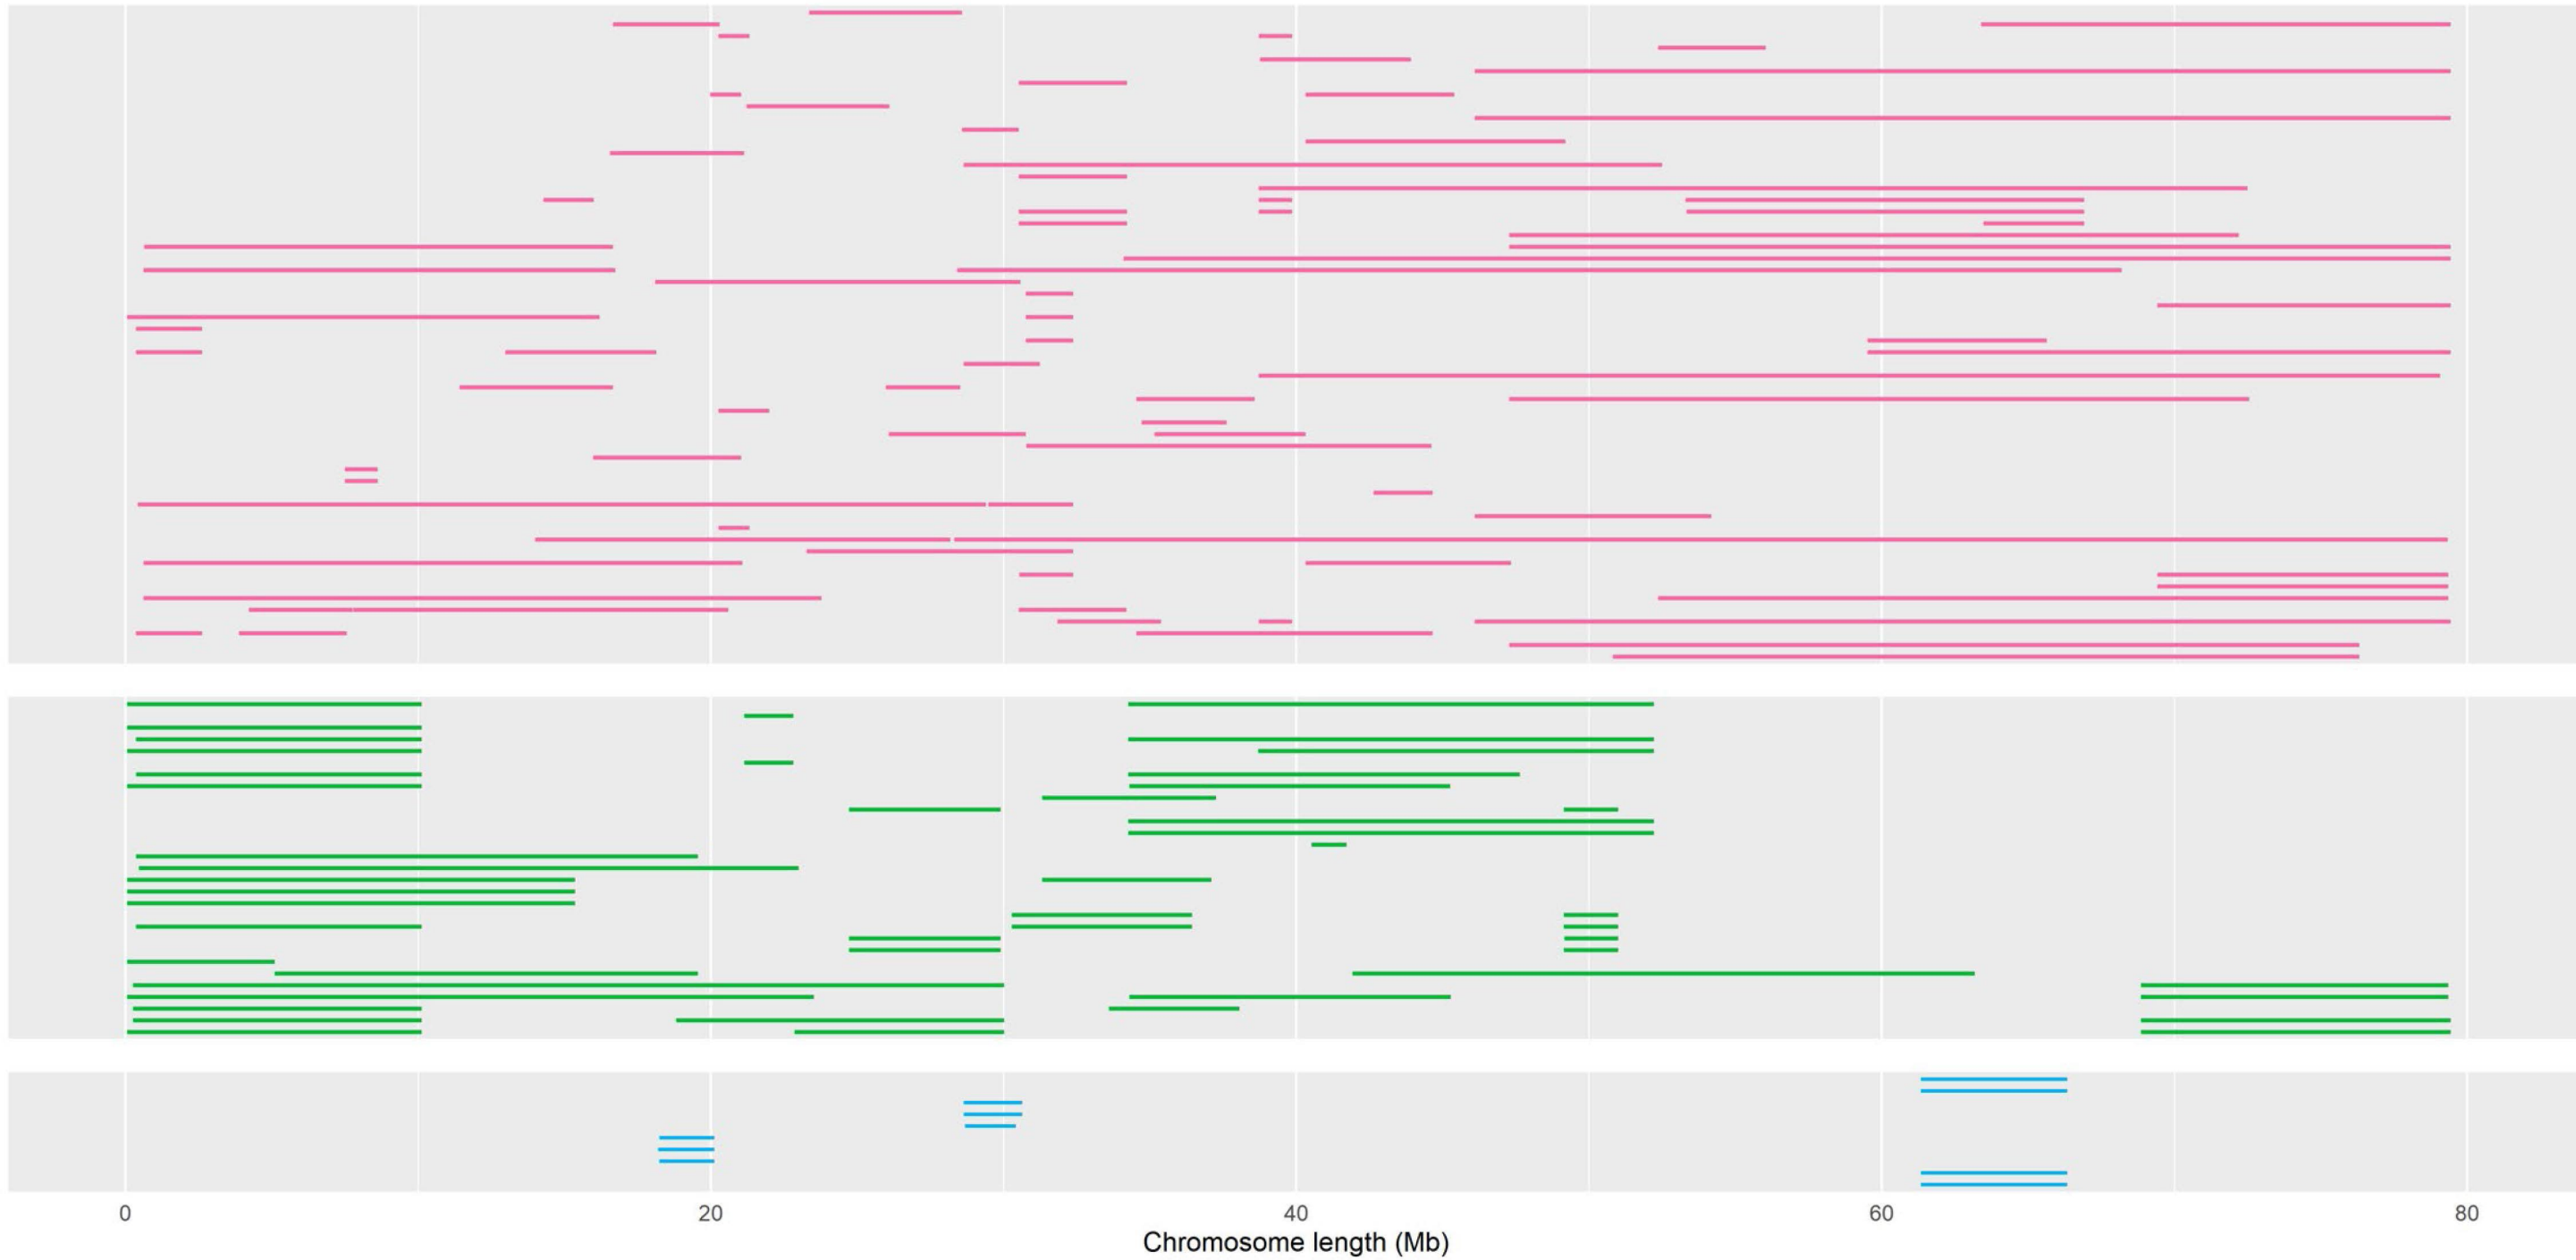

POP A POP B POP C



# Chromosome Okis12

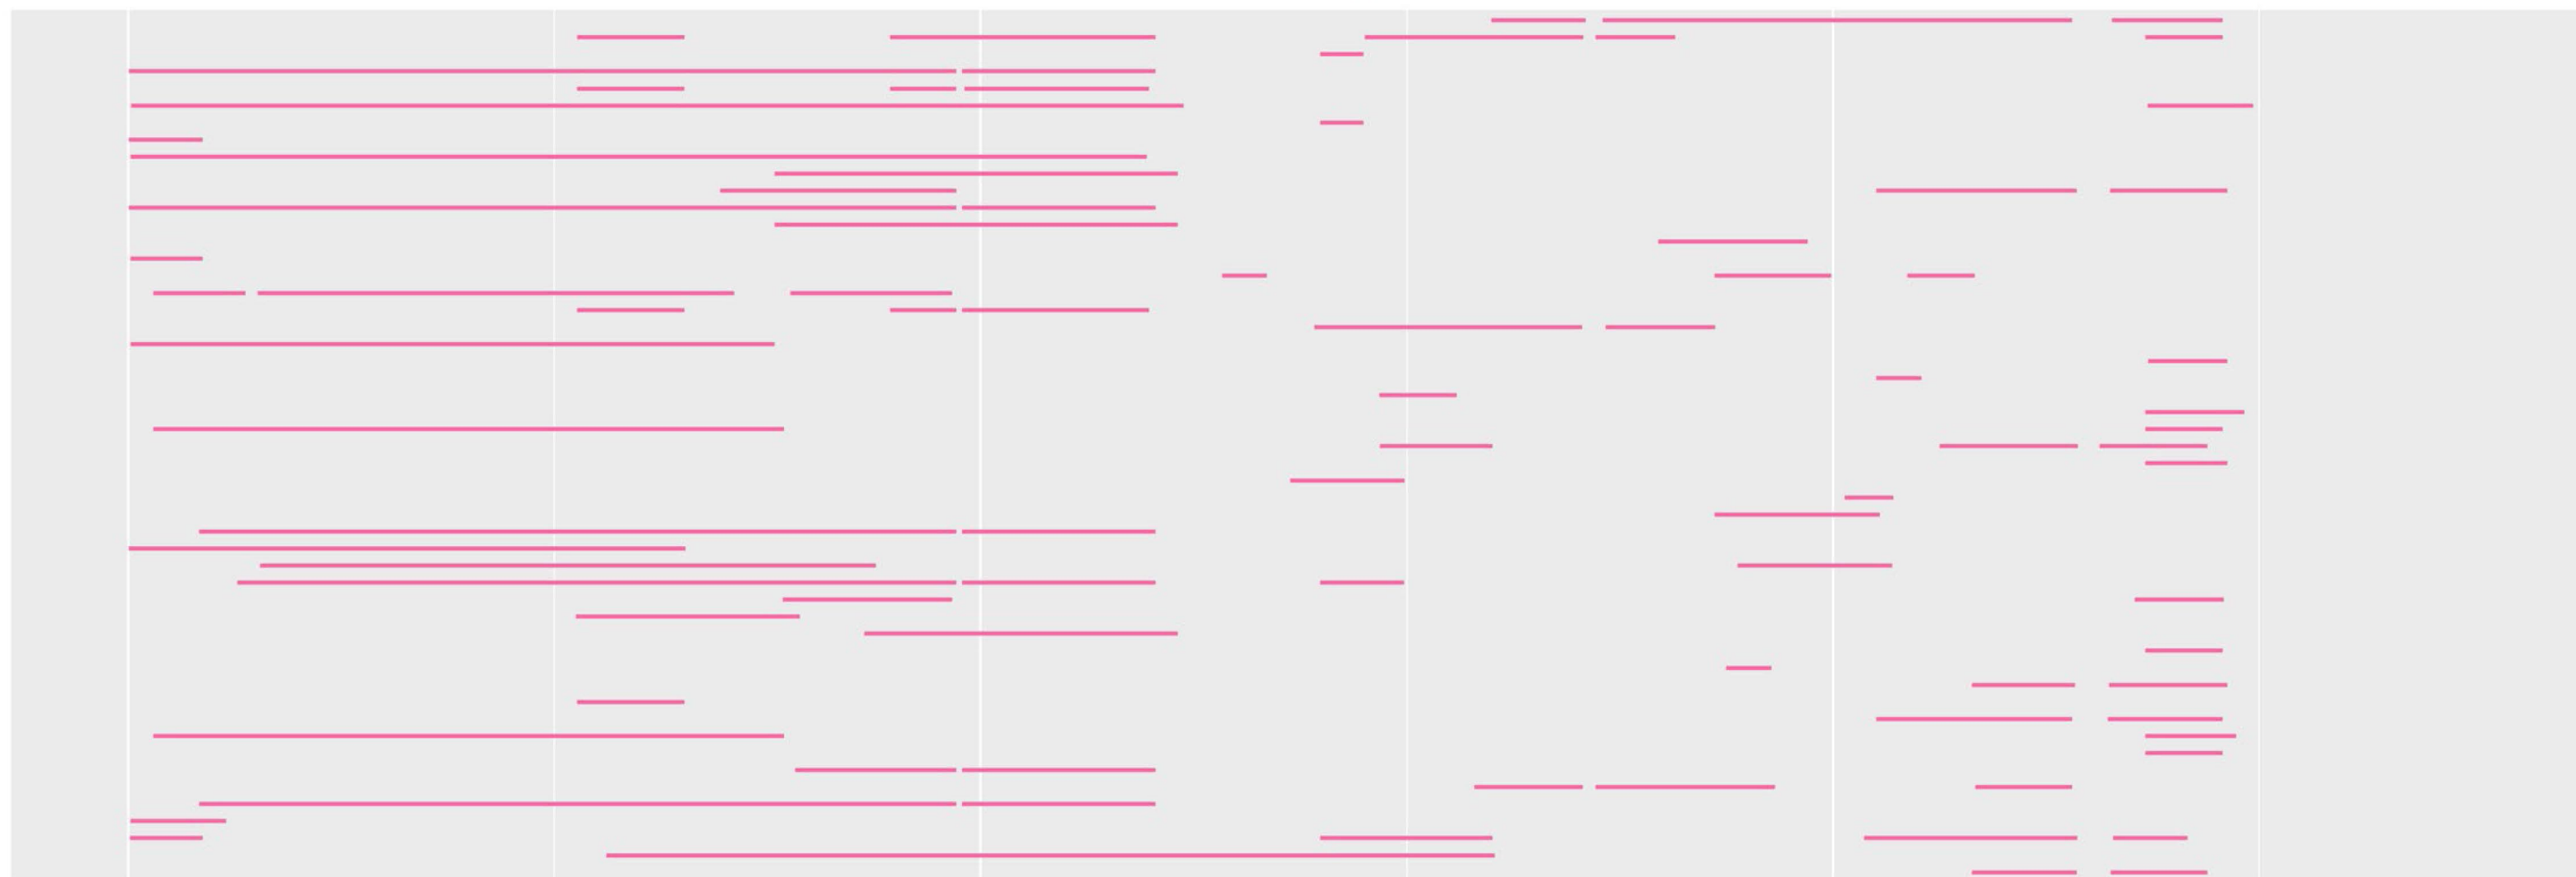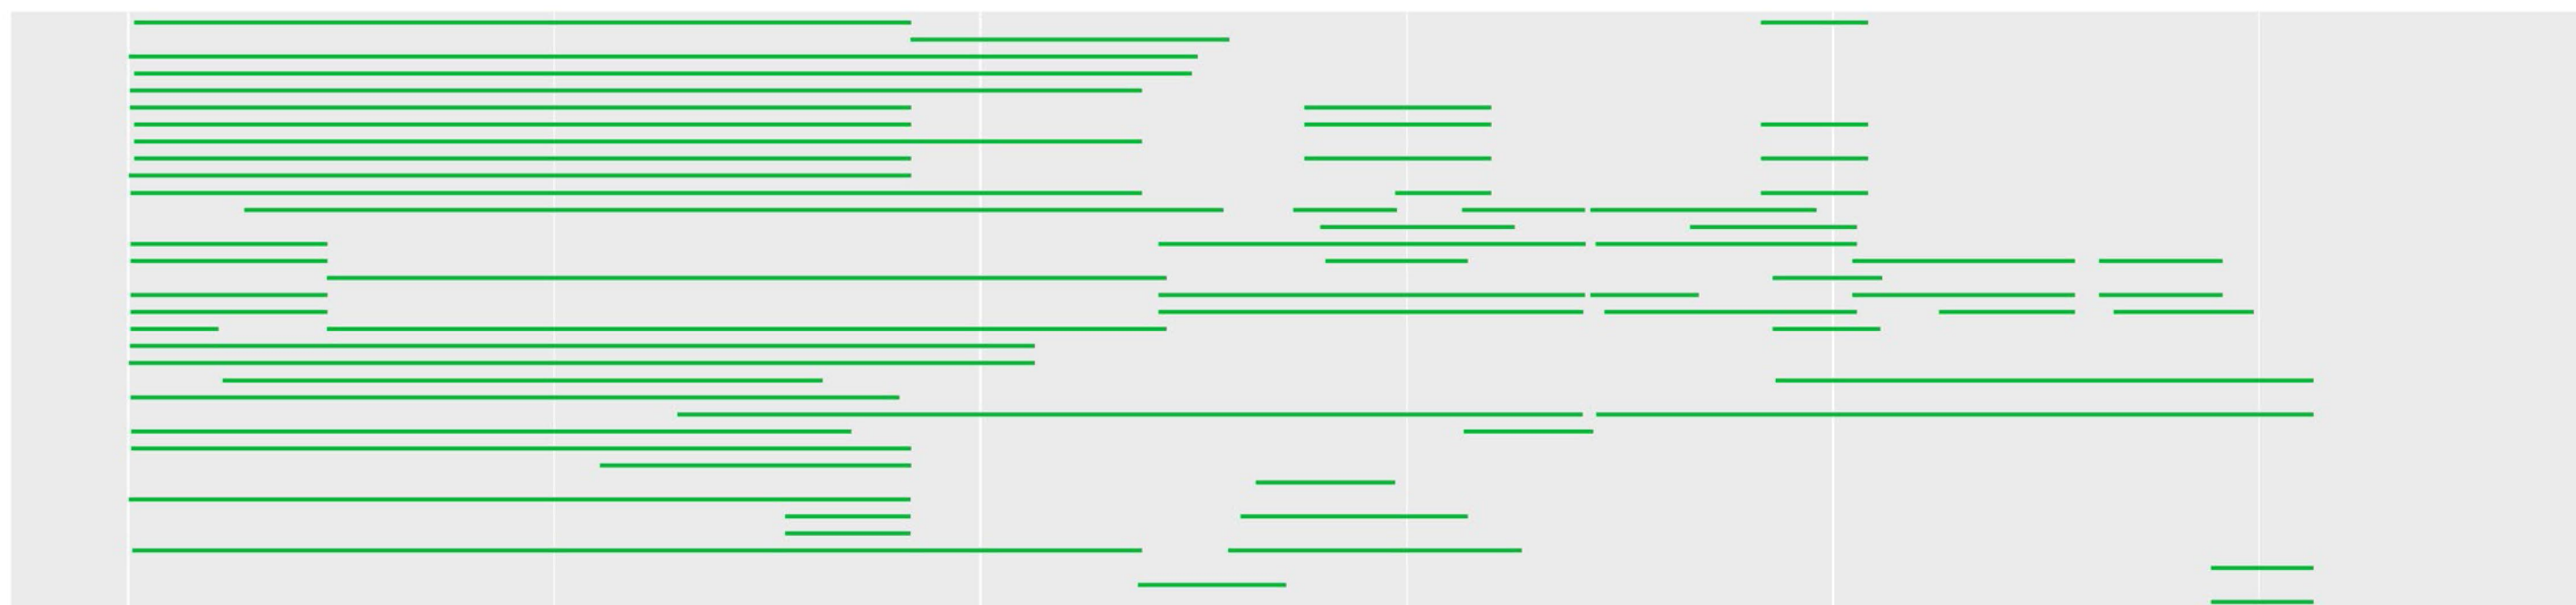

0

20

40

Chromosome length (Mb)

POP A POP B POP C



# Chromosome Okis13

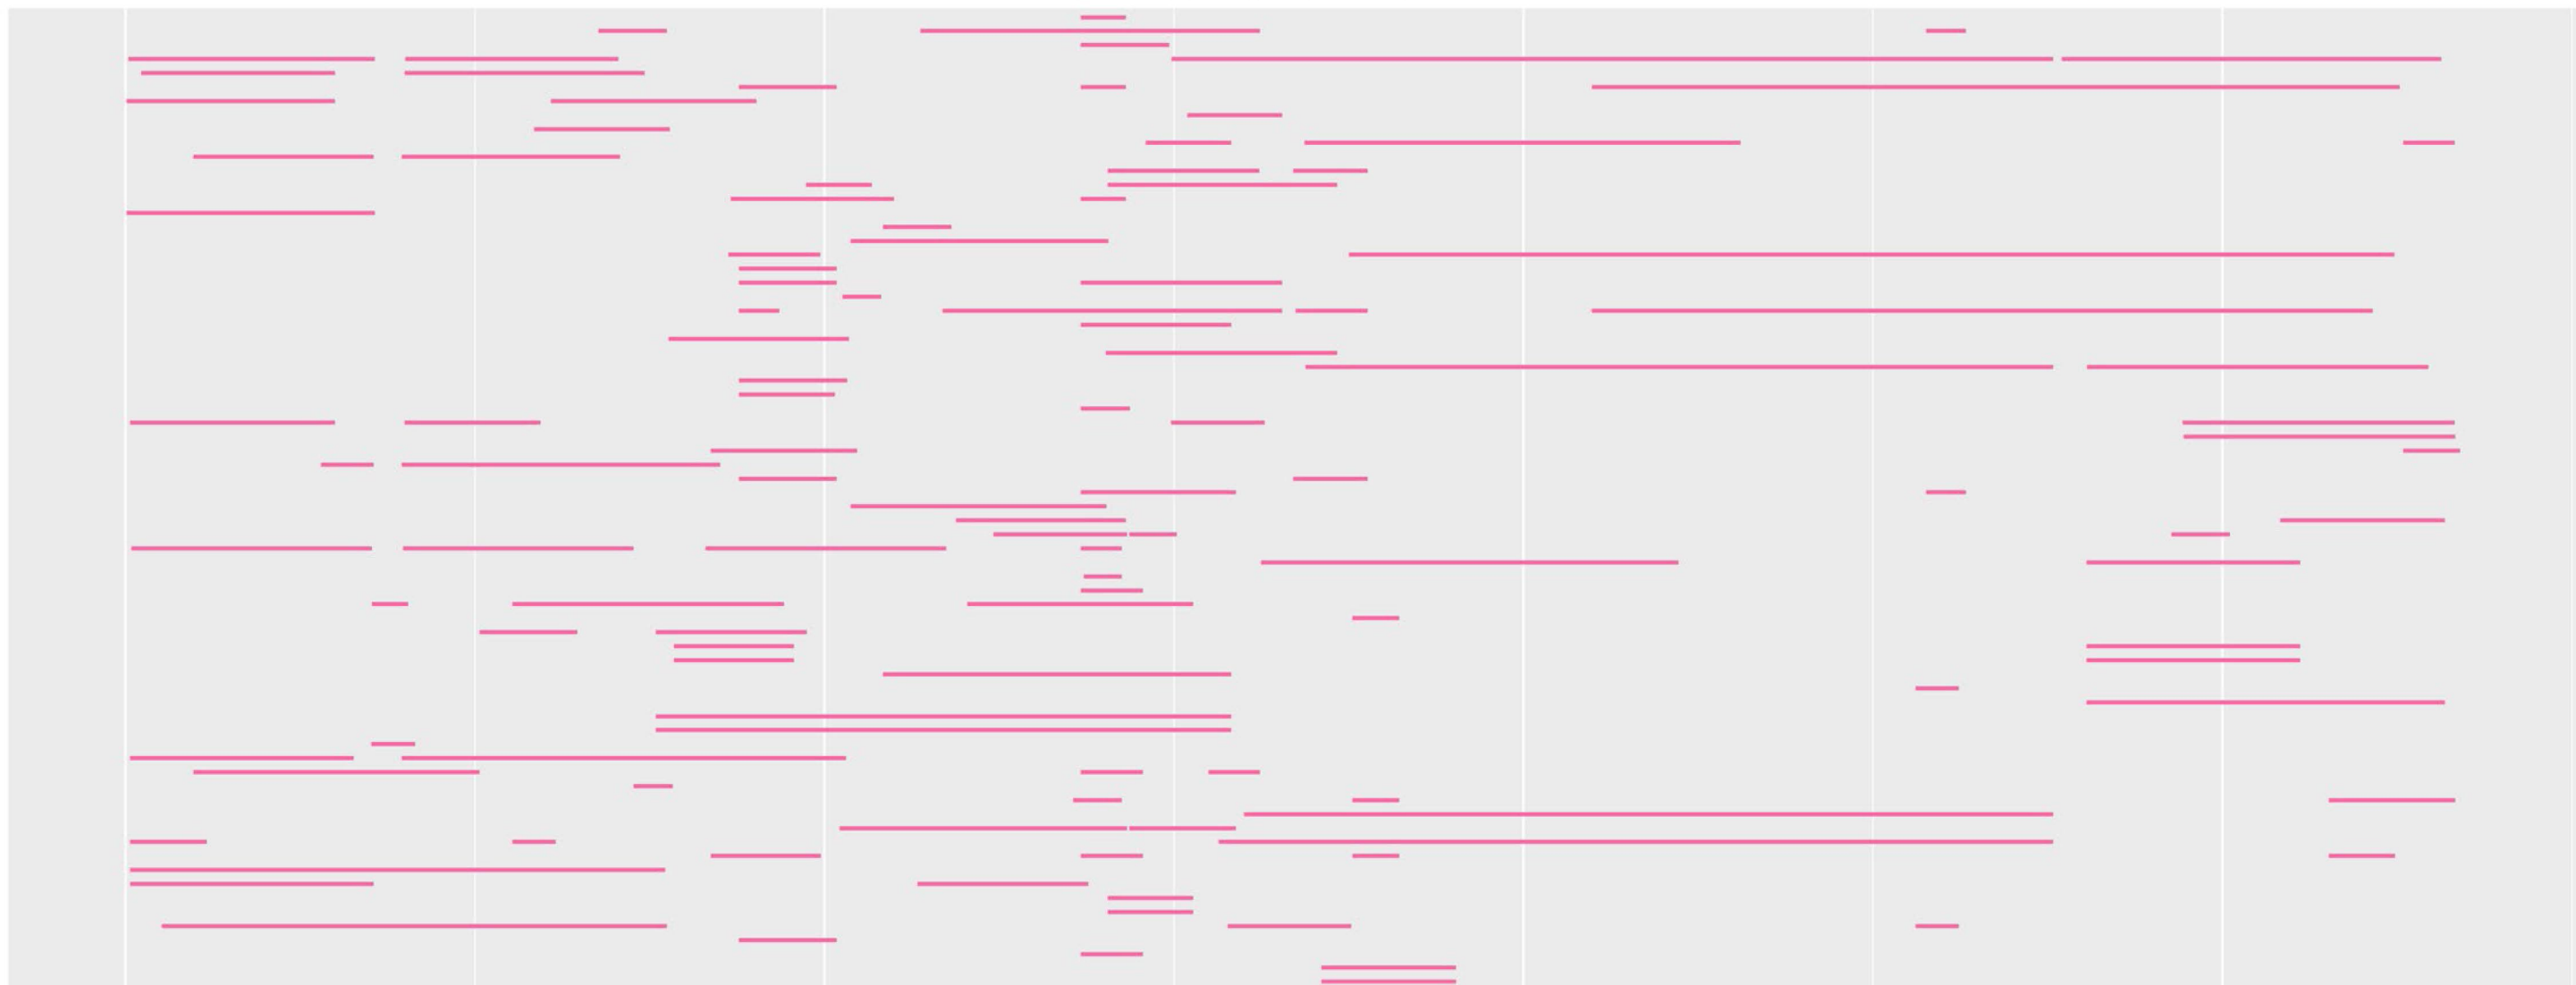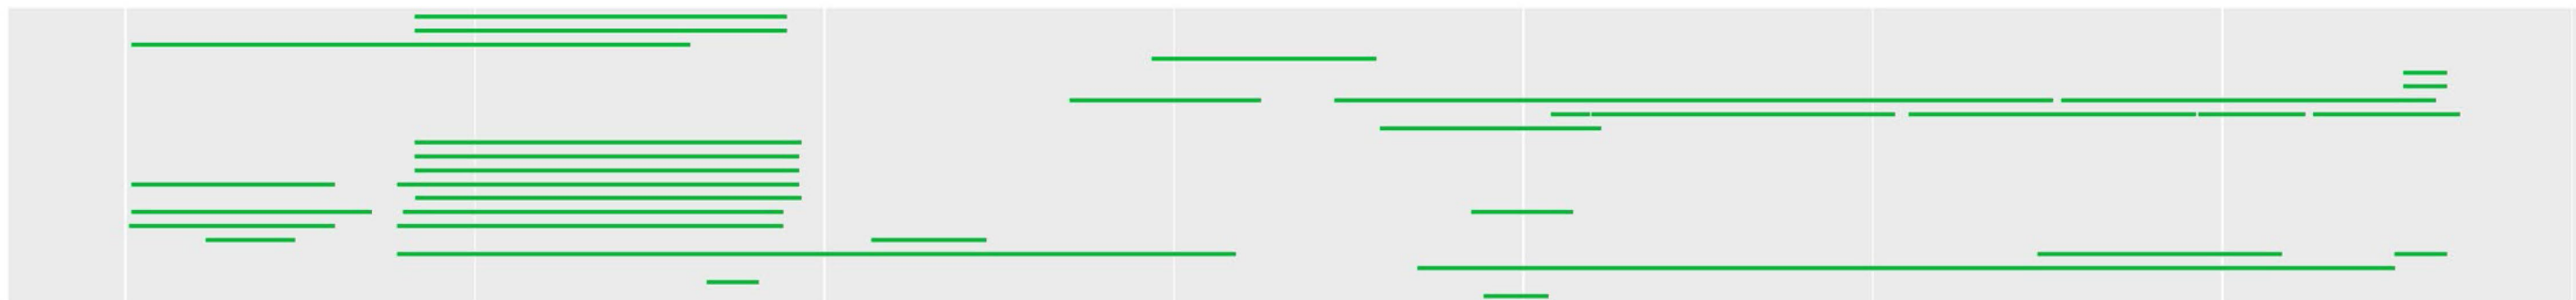

0

20

40

60

Chromosome length (Mb)

POP A POP B POP C

Chromosome Okis14

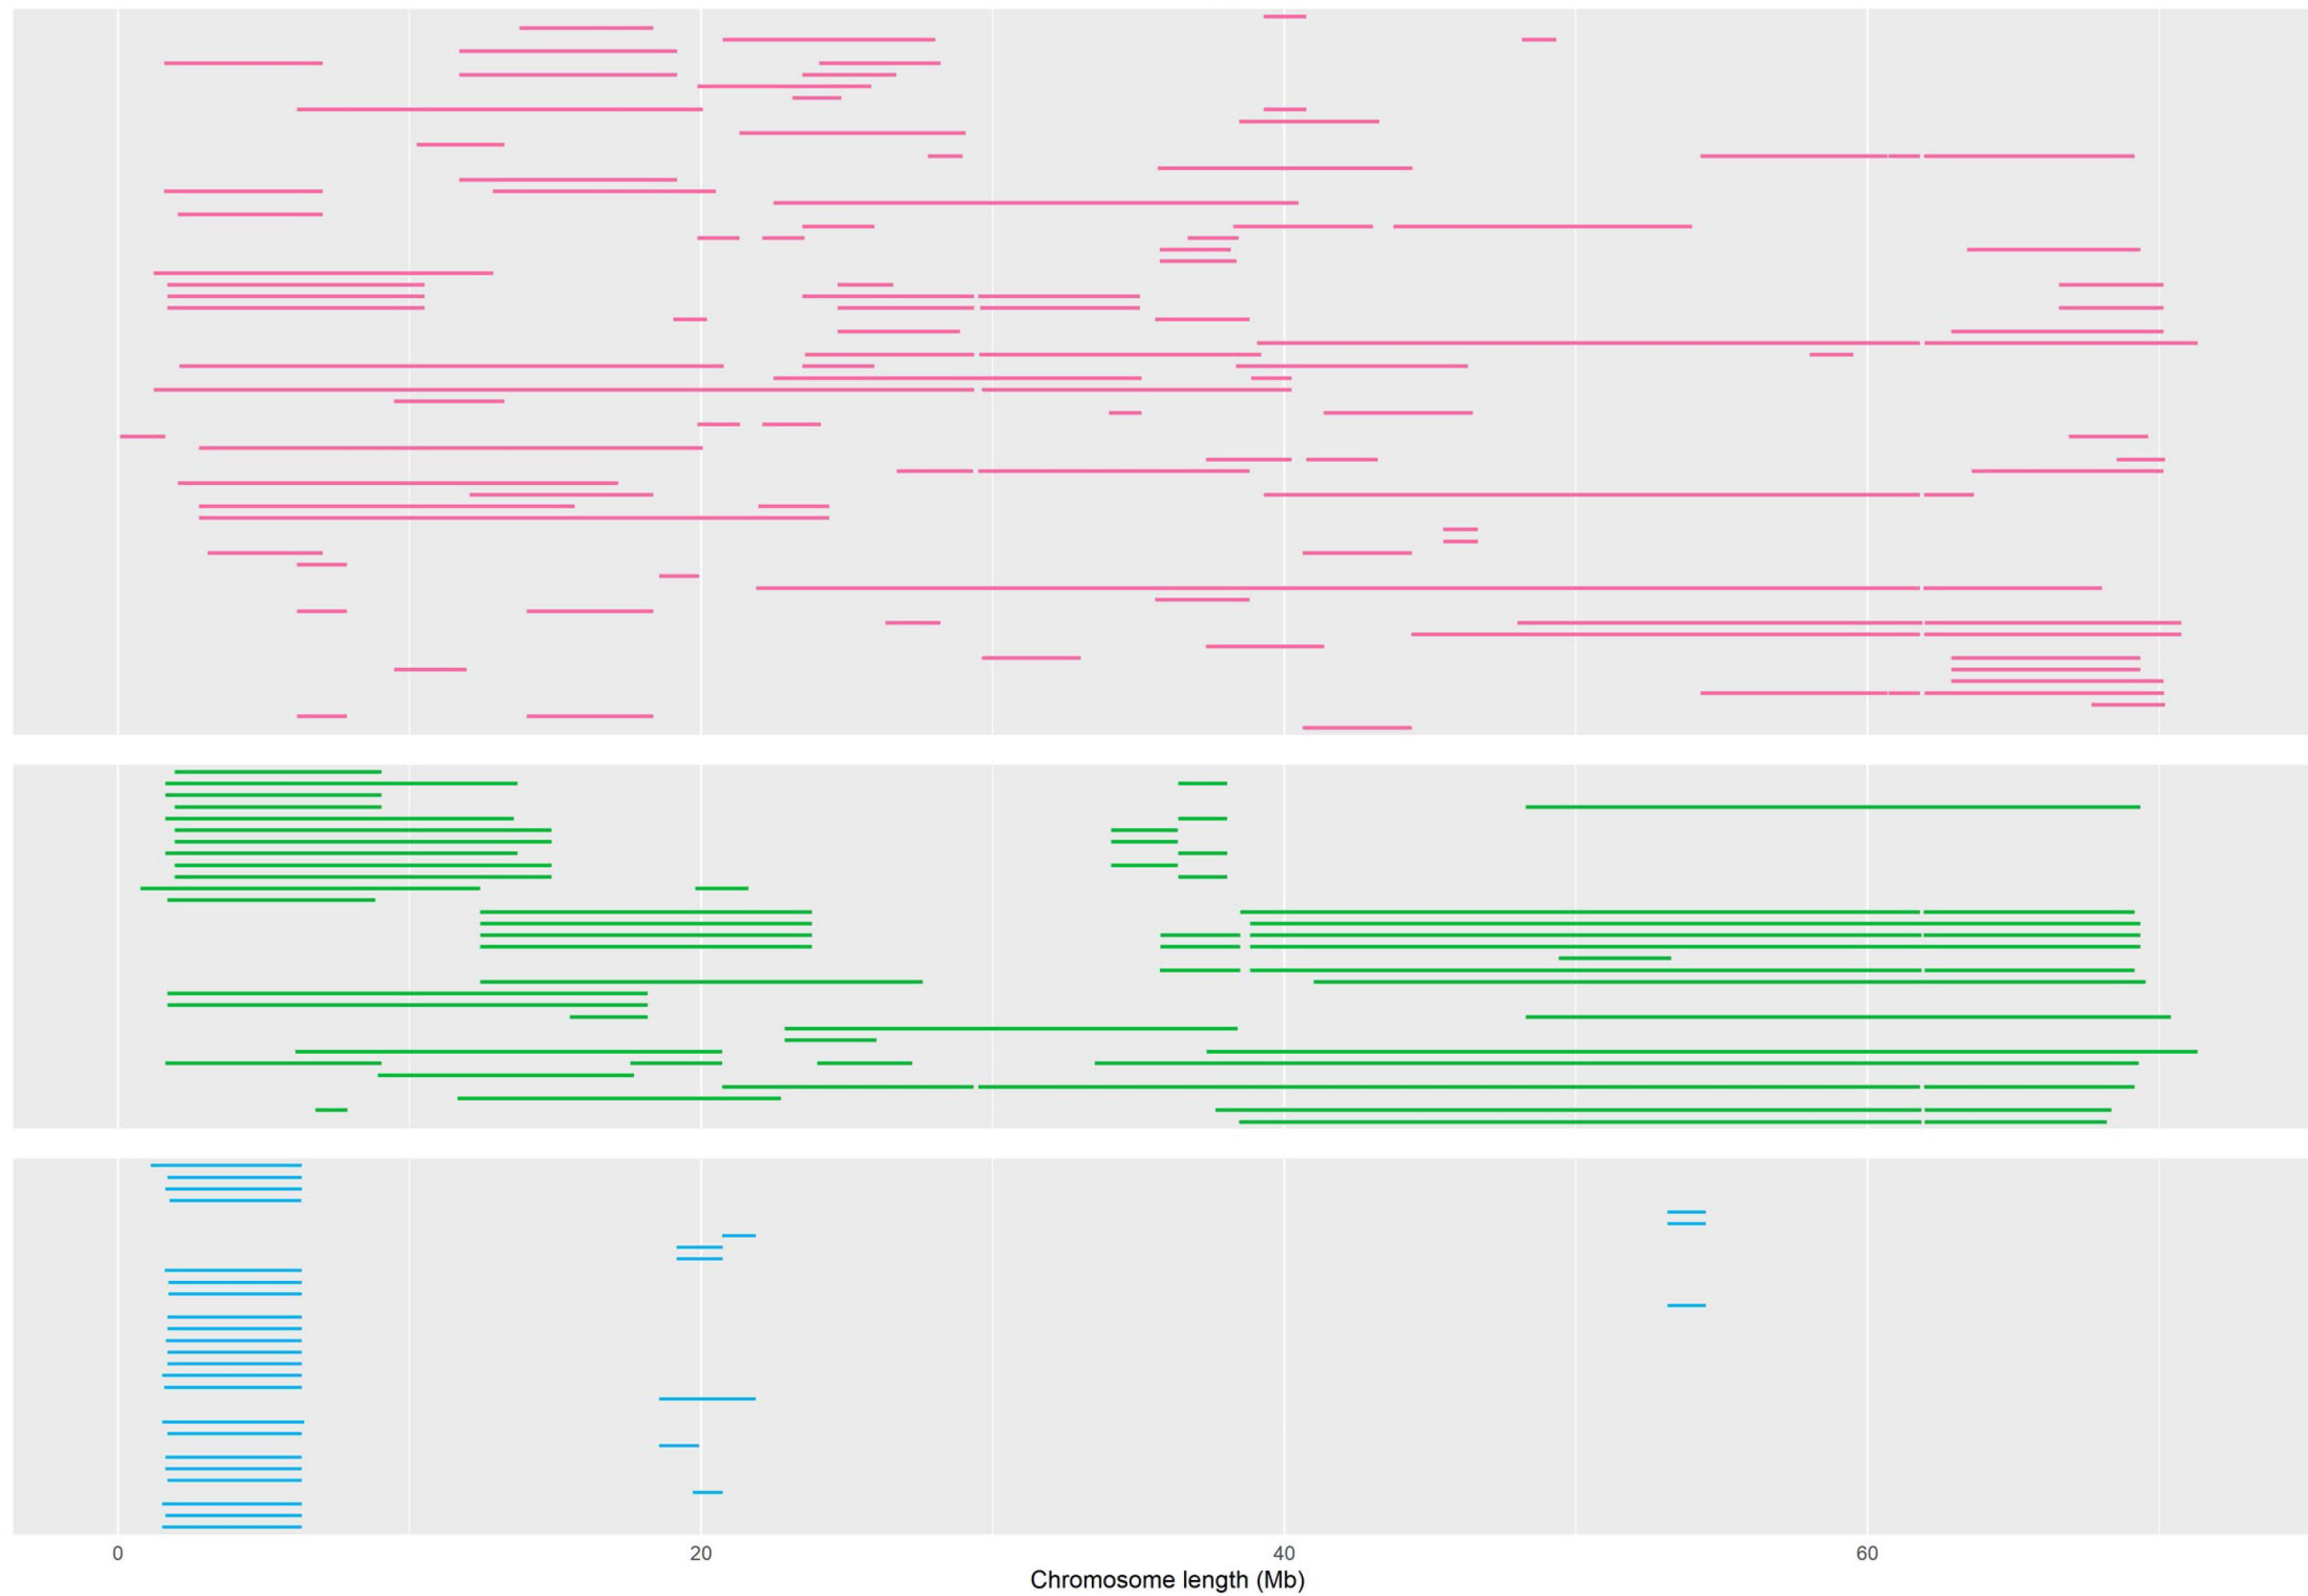

POP A POP B POP C

# Chromosome Okis15

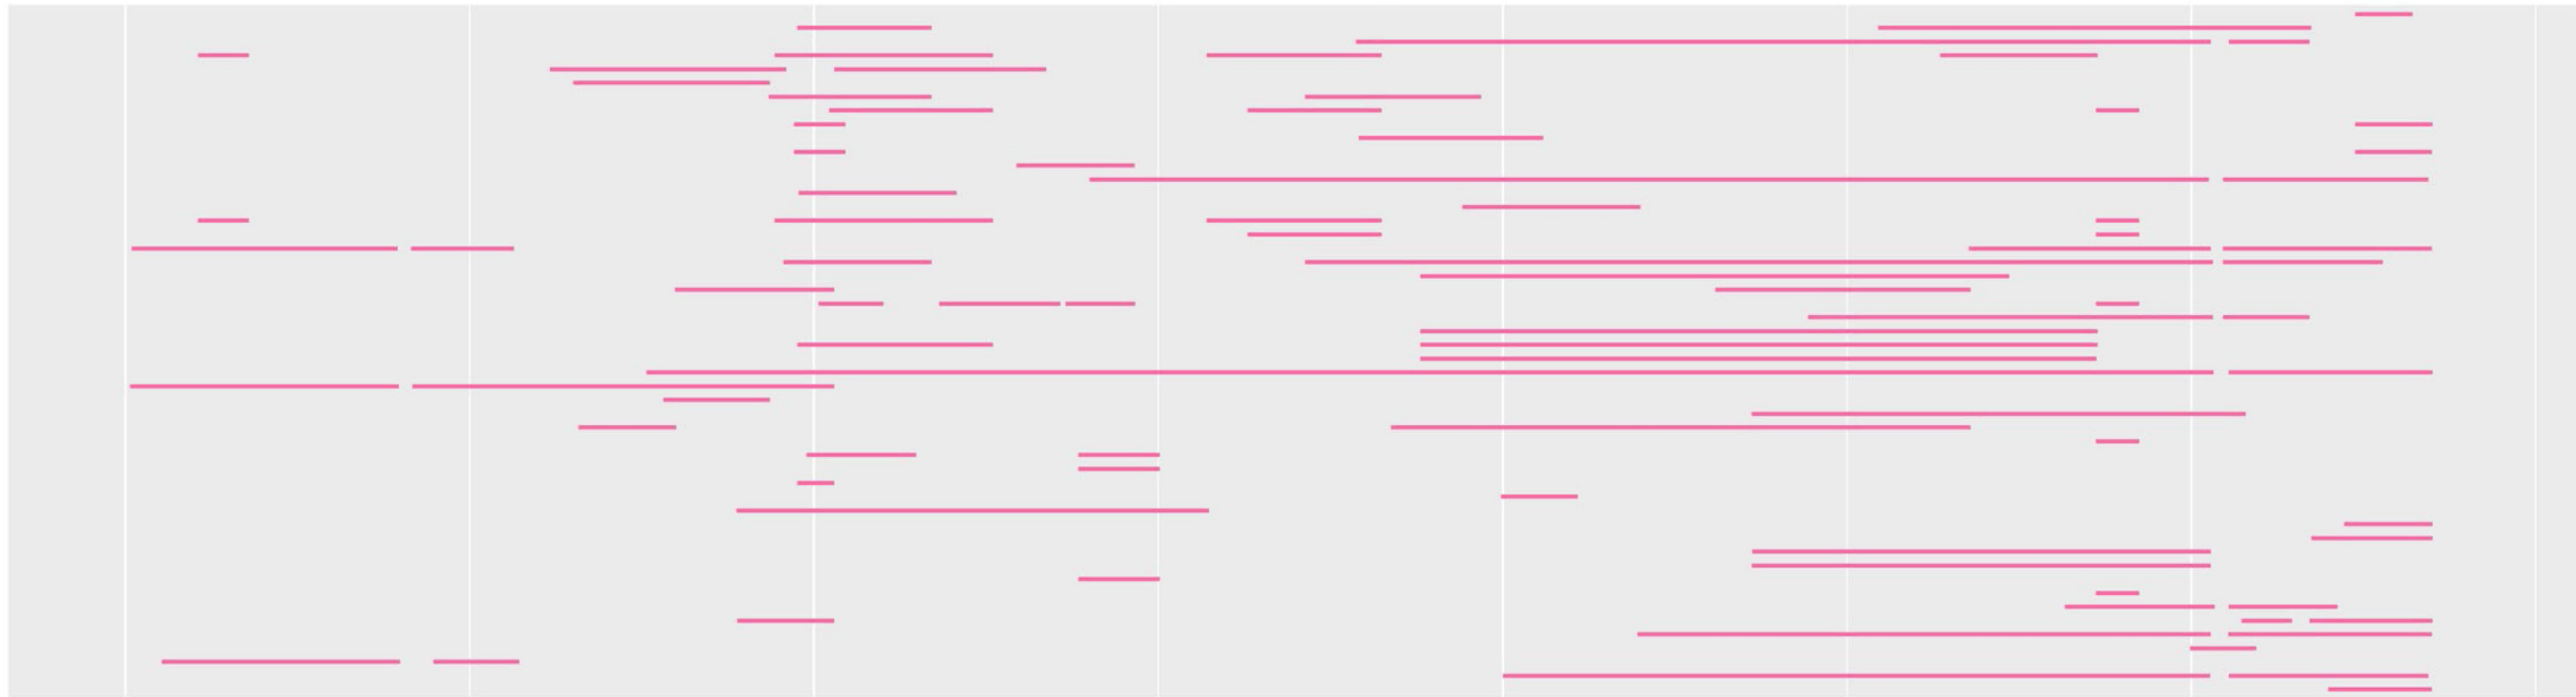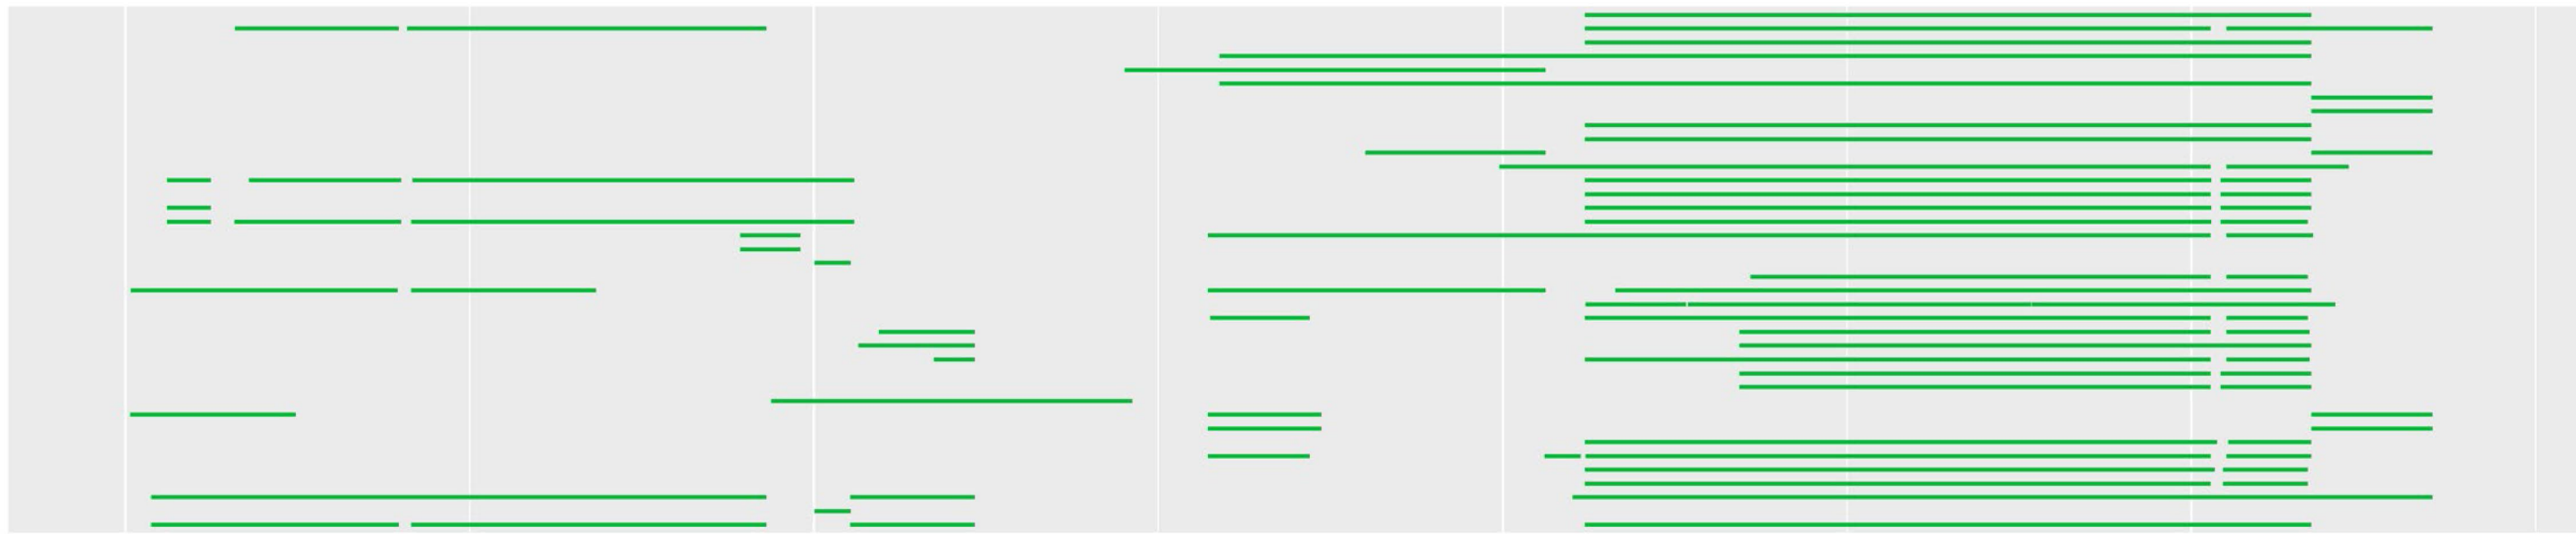

0

20

40

60

Chromosome length (Mb)

POP A POP B POP C

Chromosome Okis16

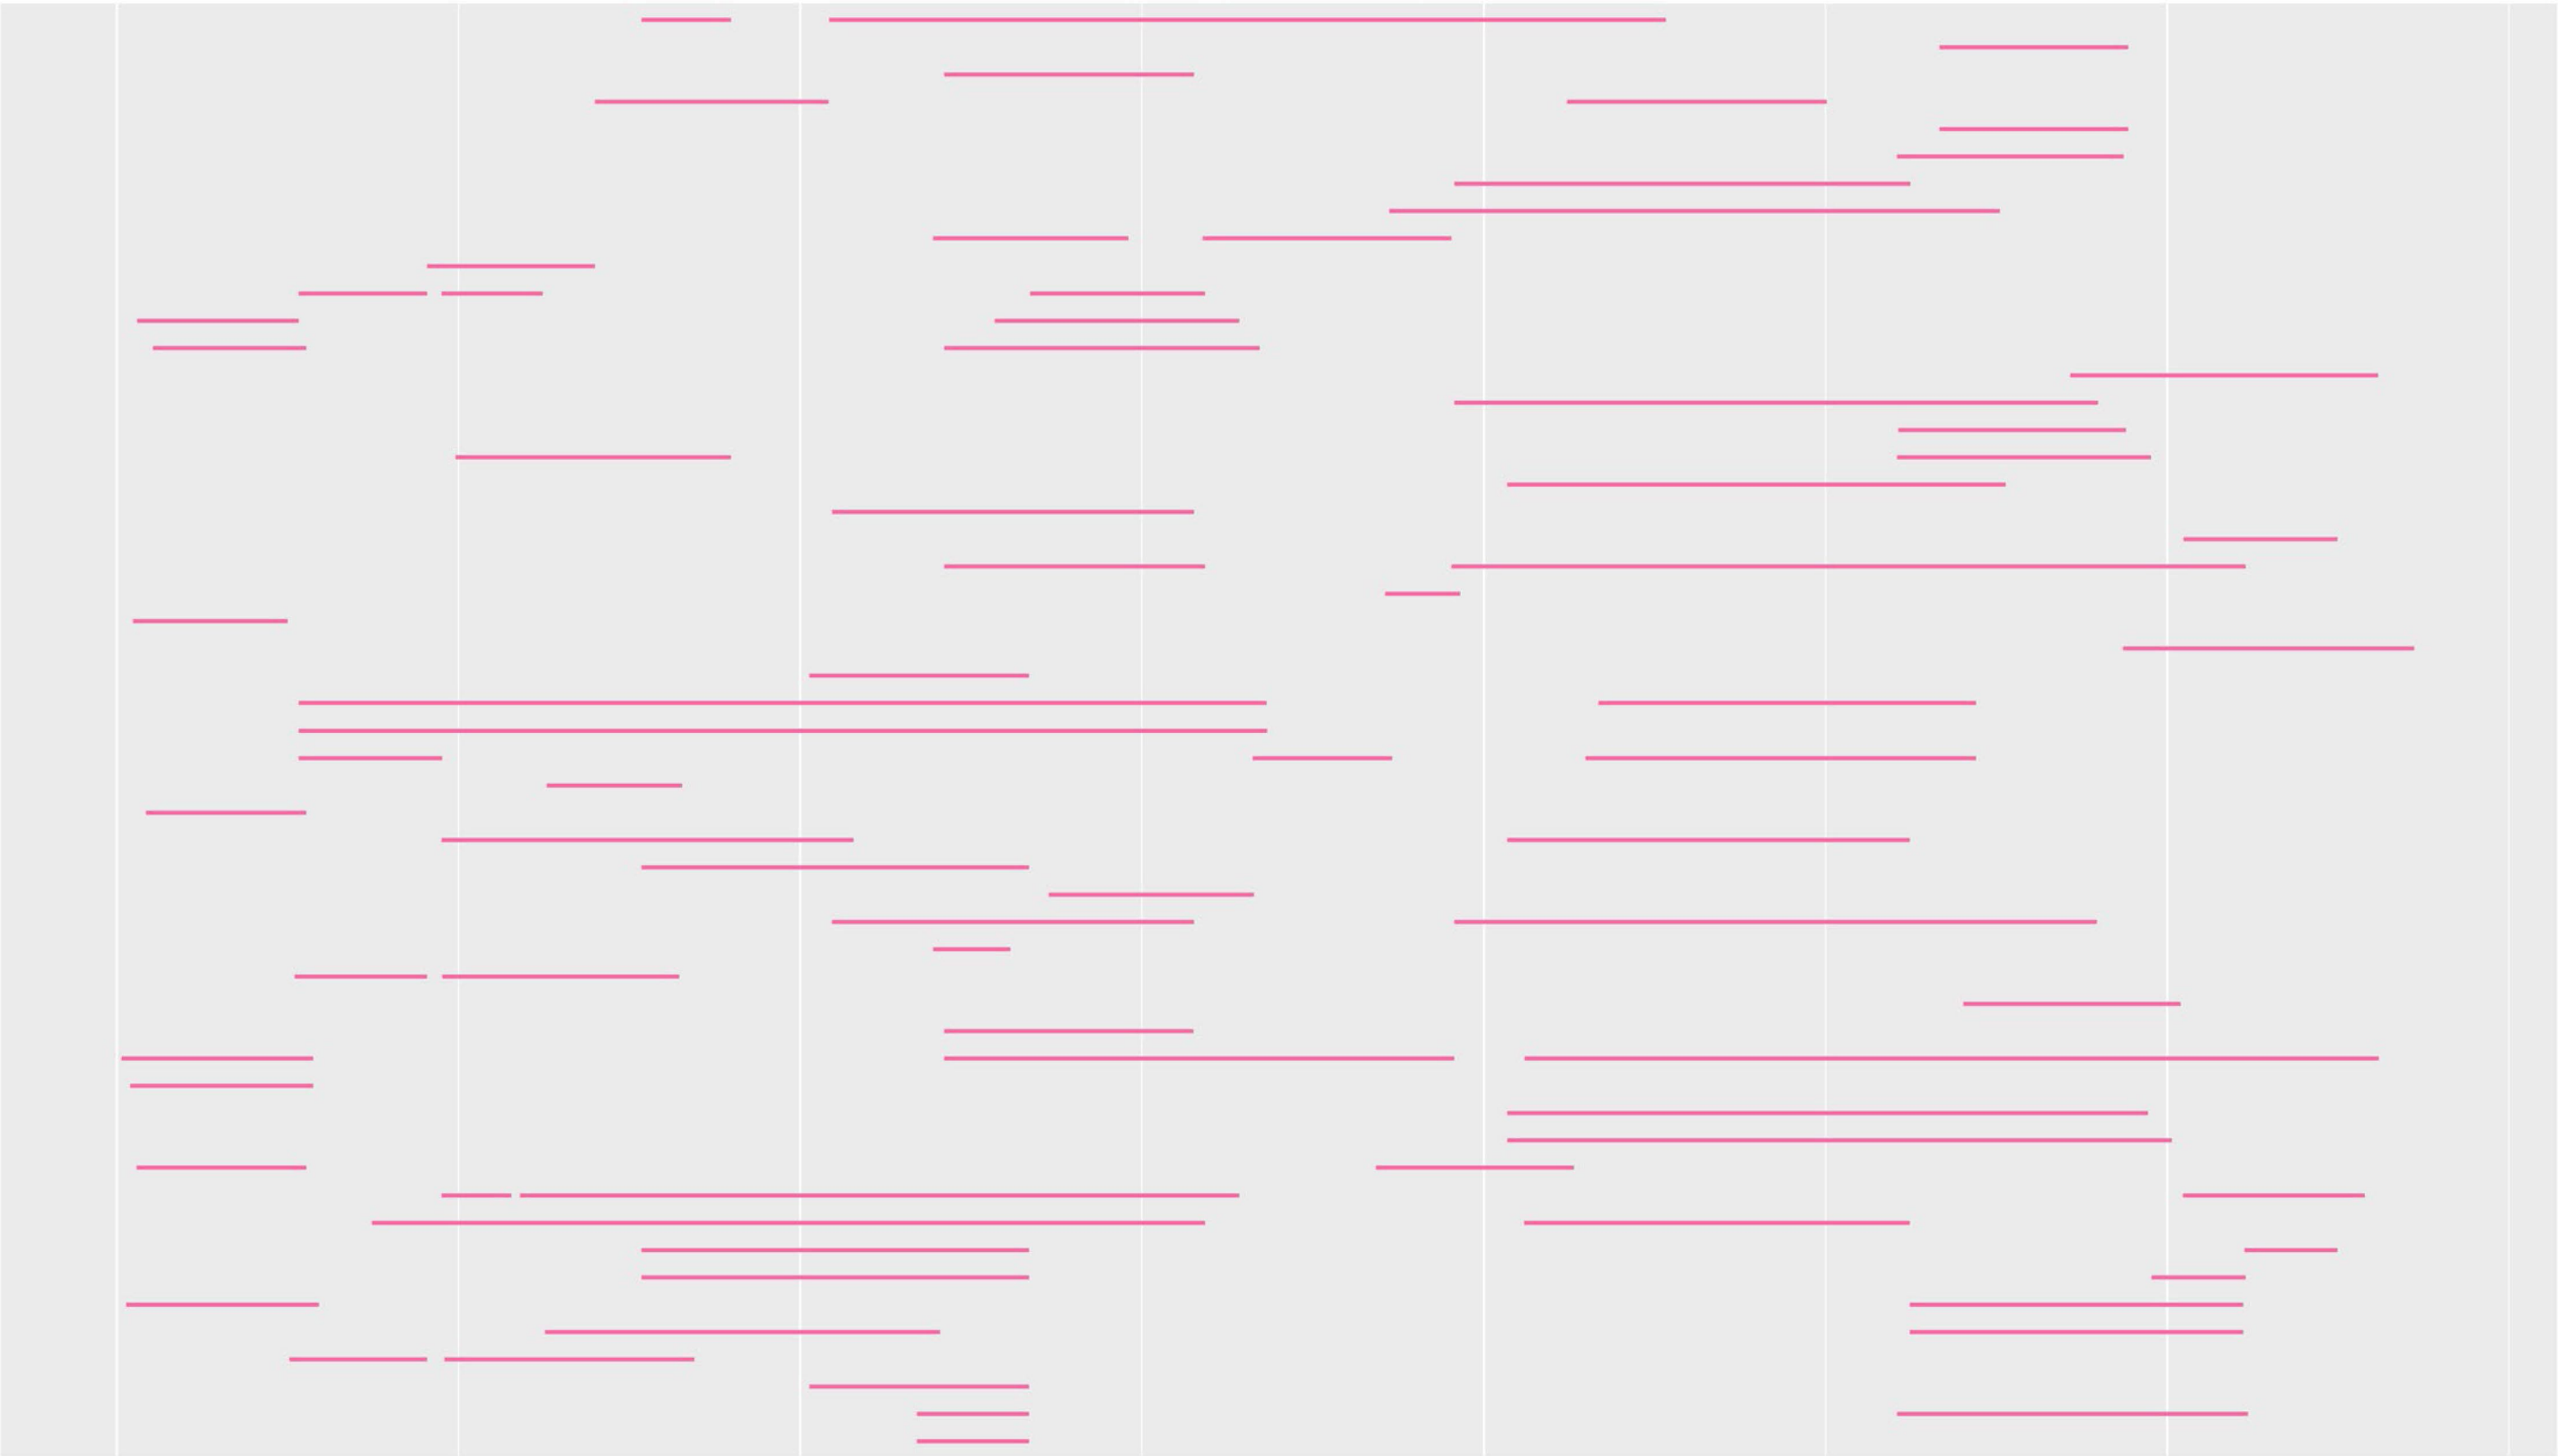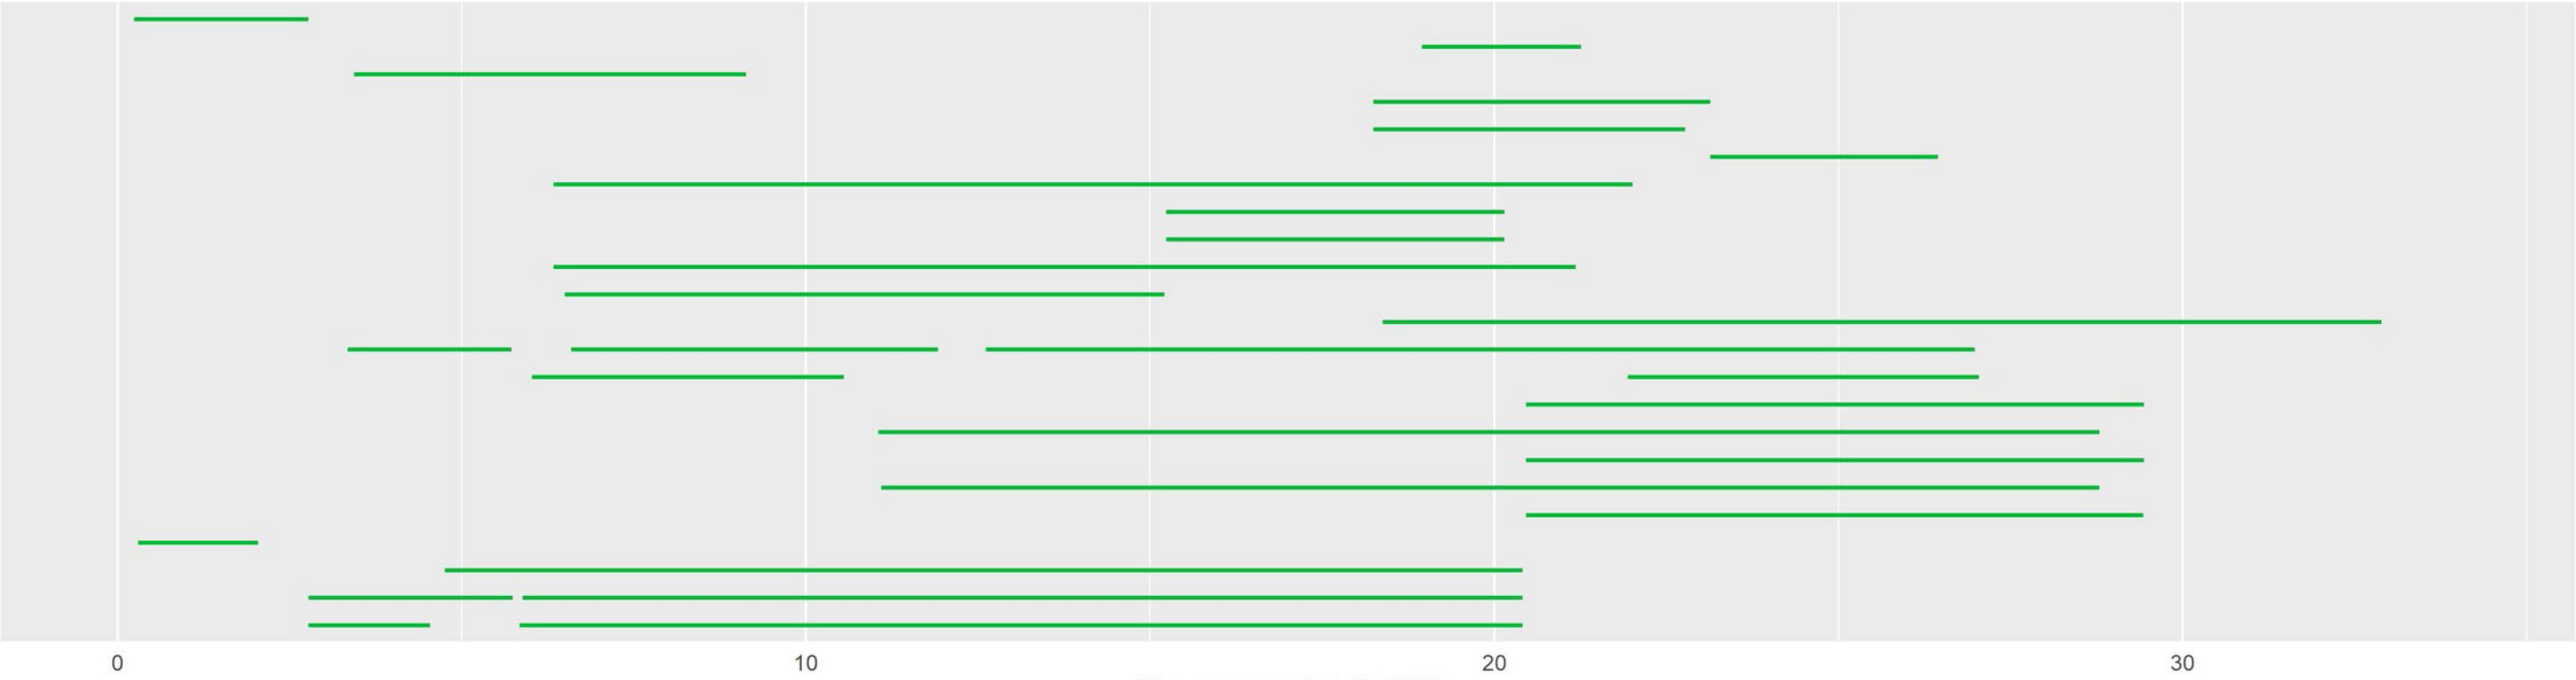

POP A POP B POP C

Chromosome Okis17

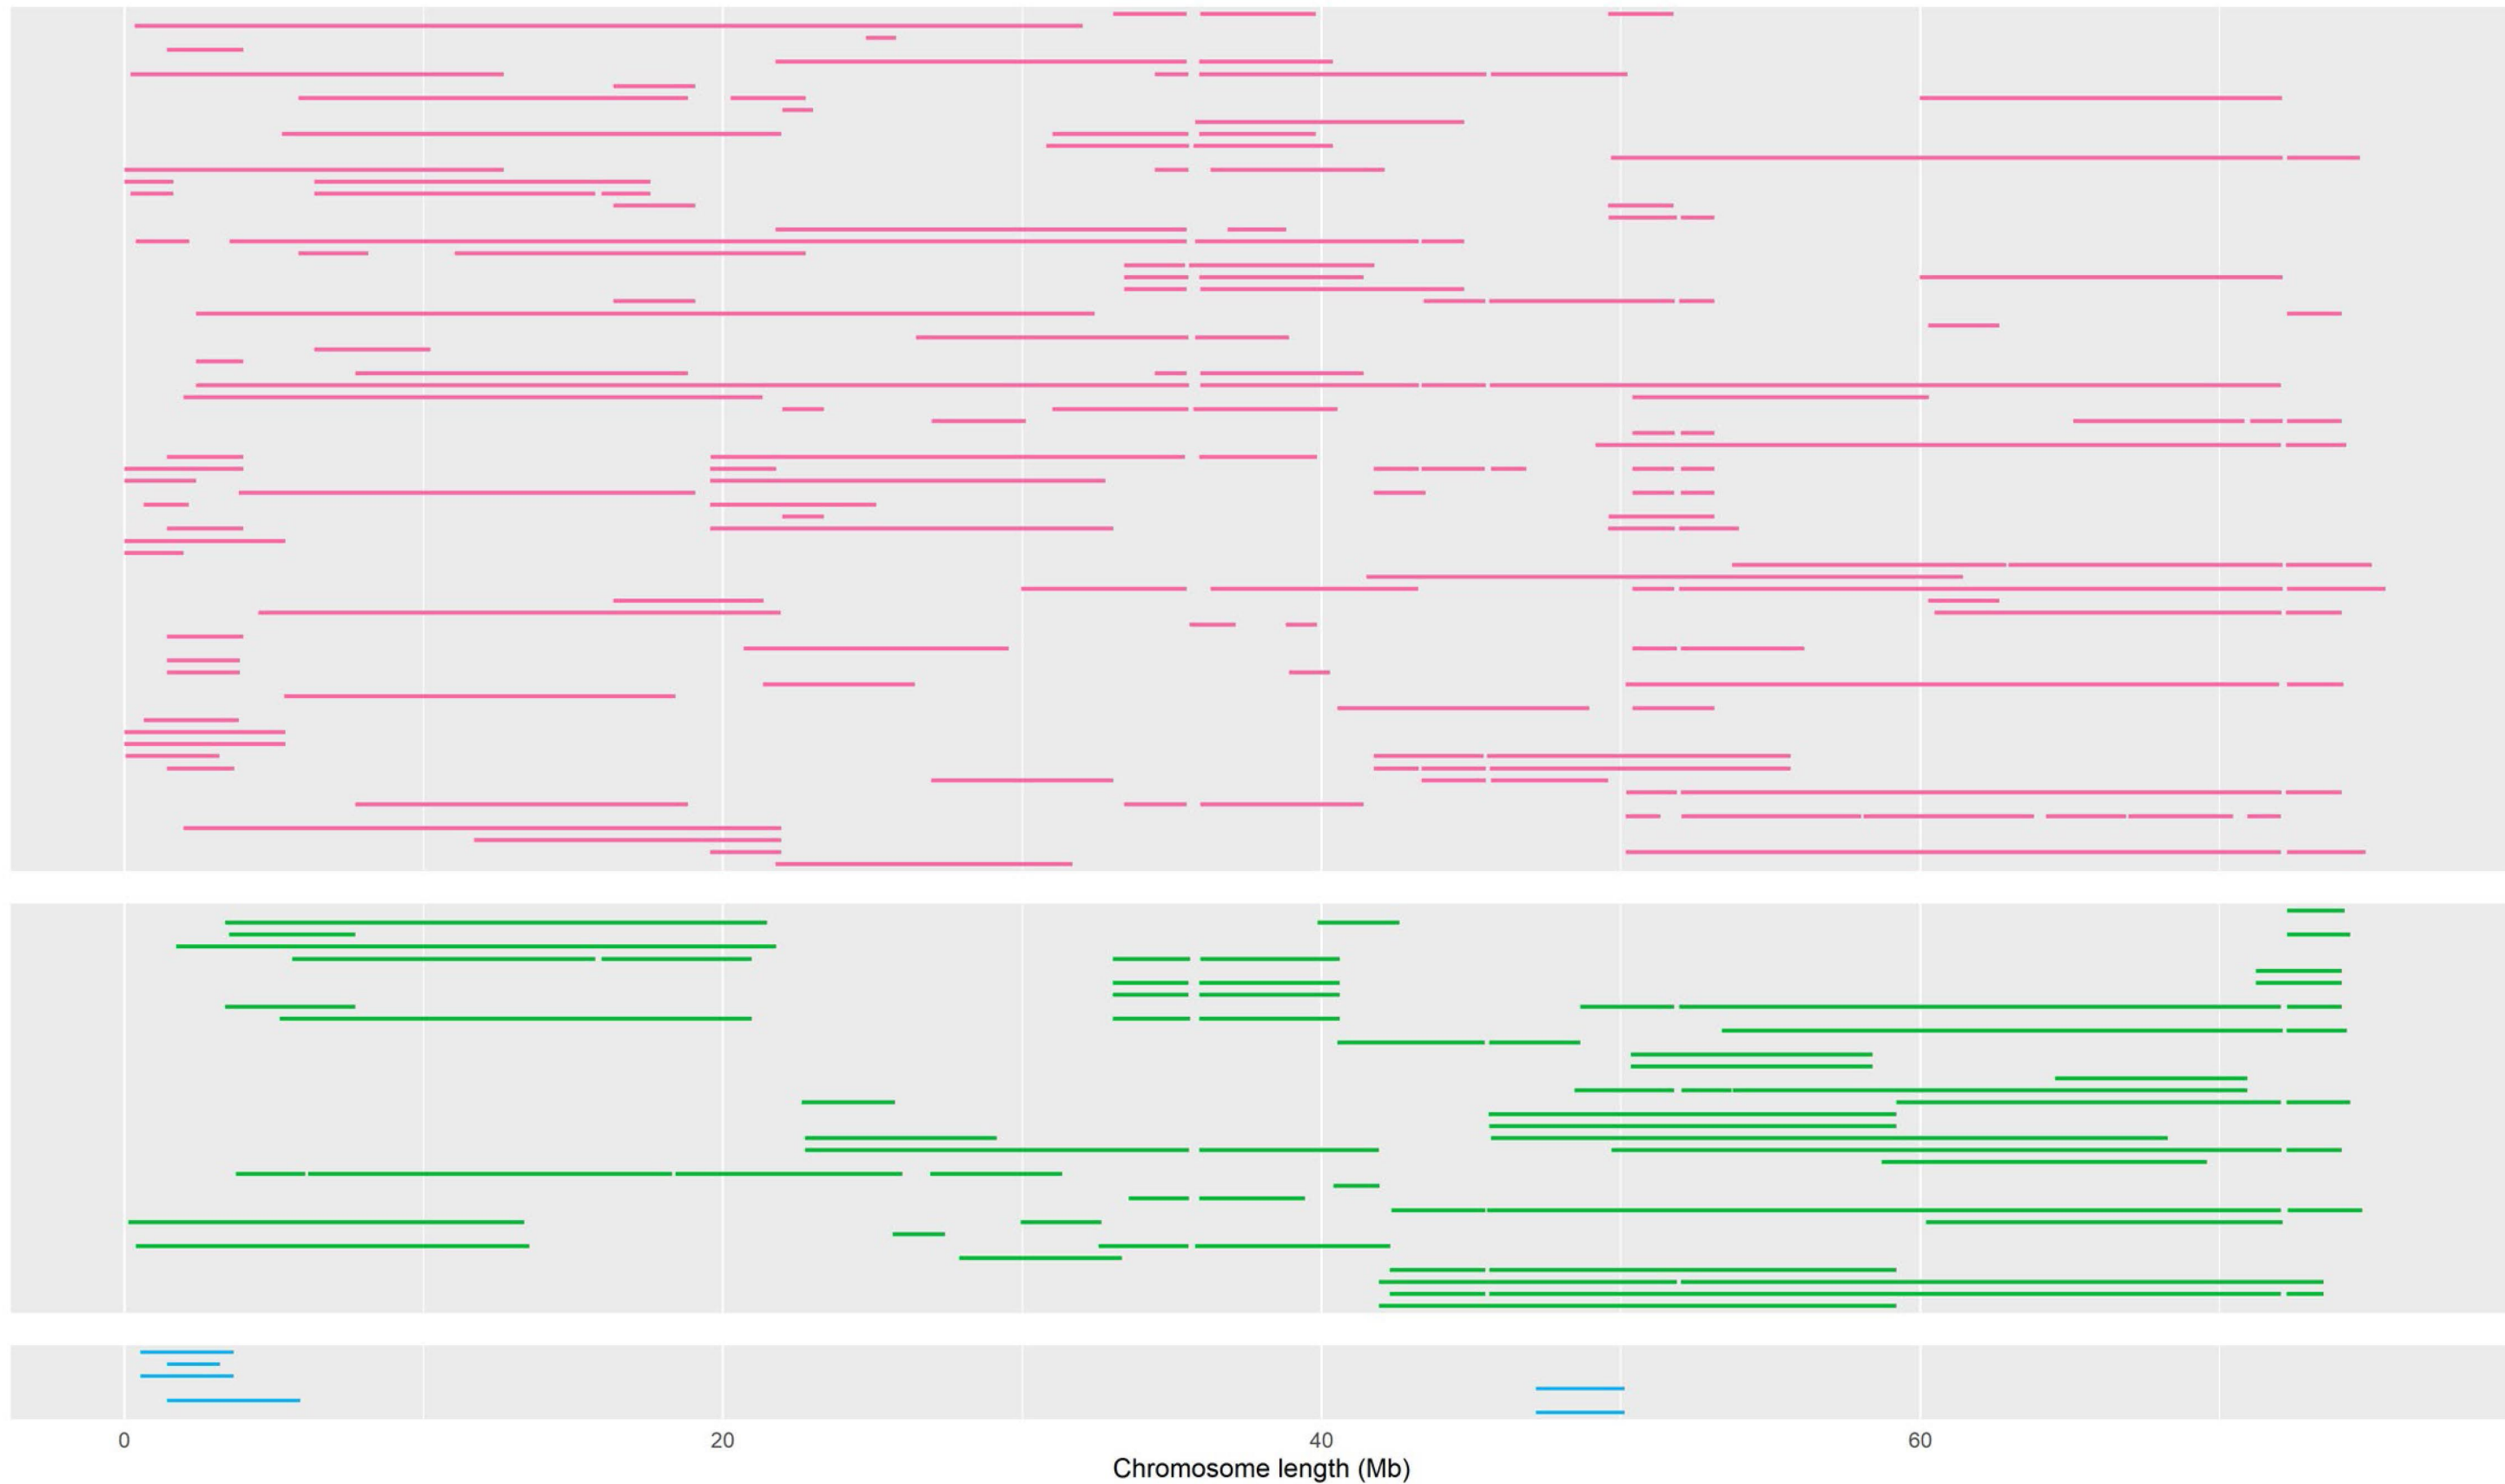

Chromosome Okis18

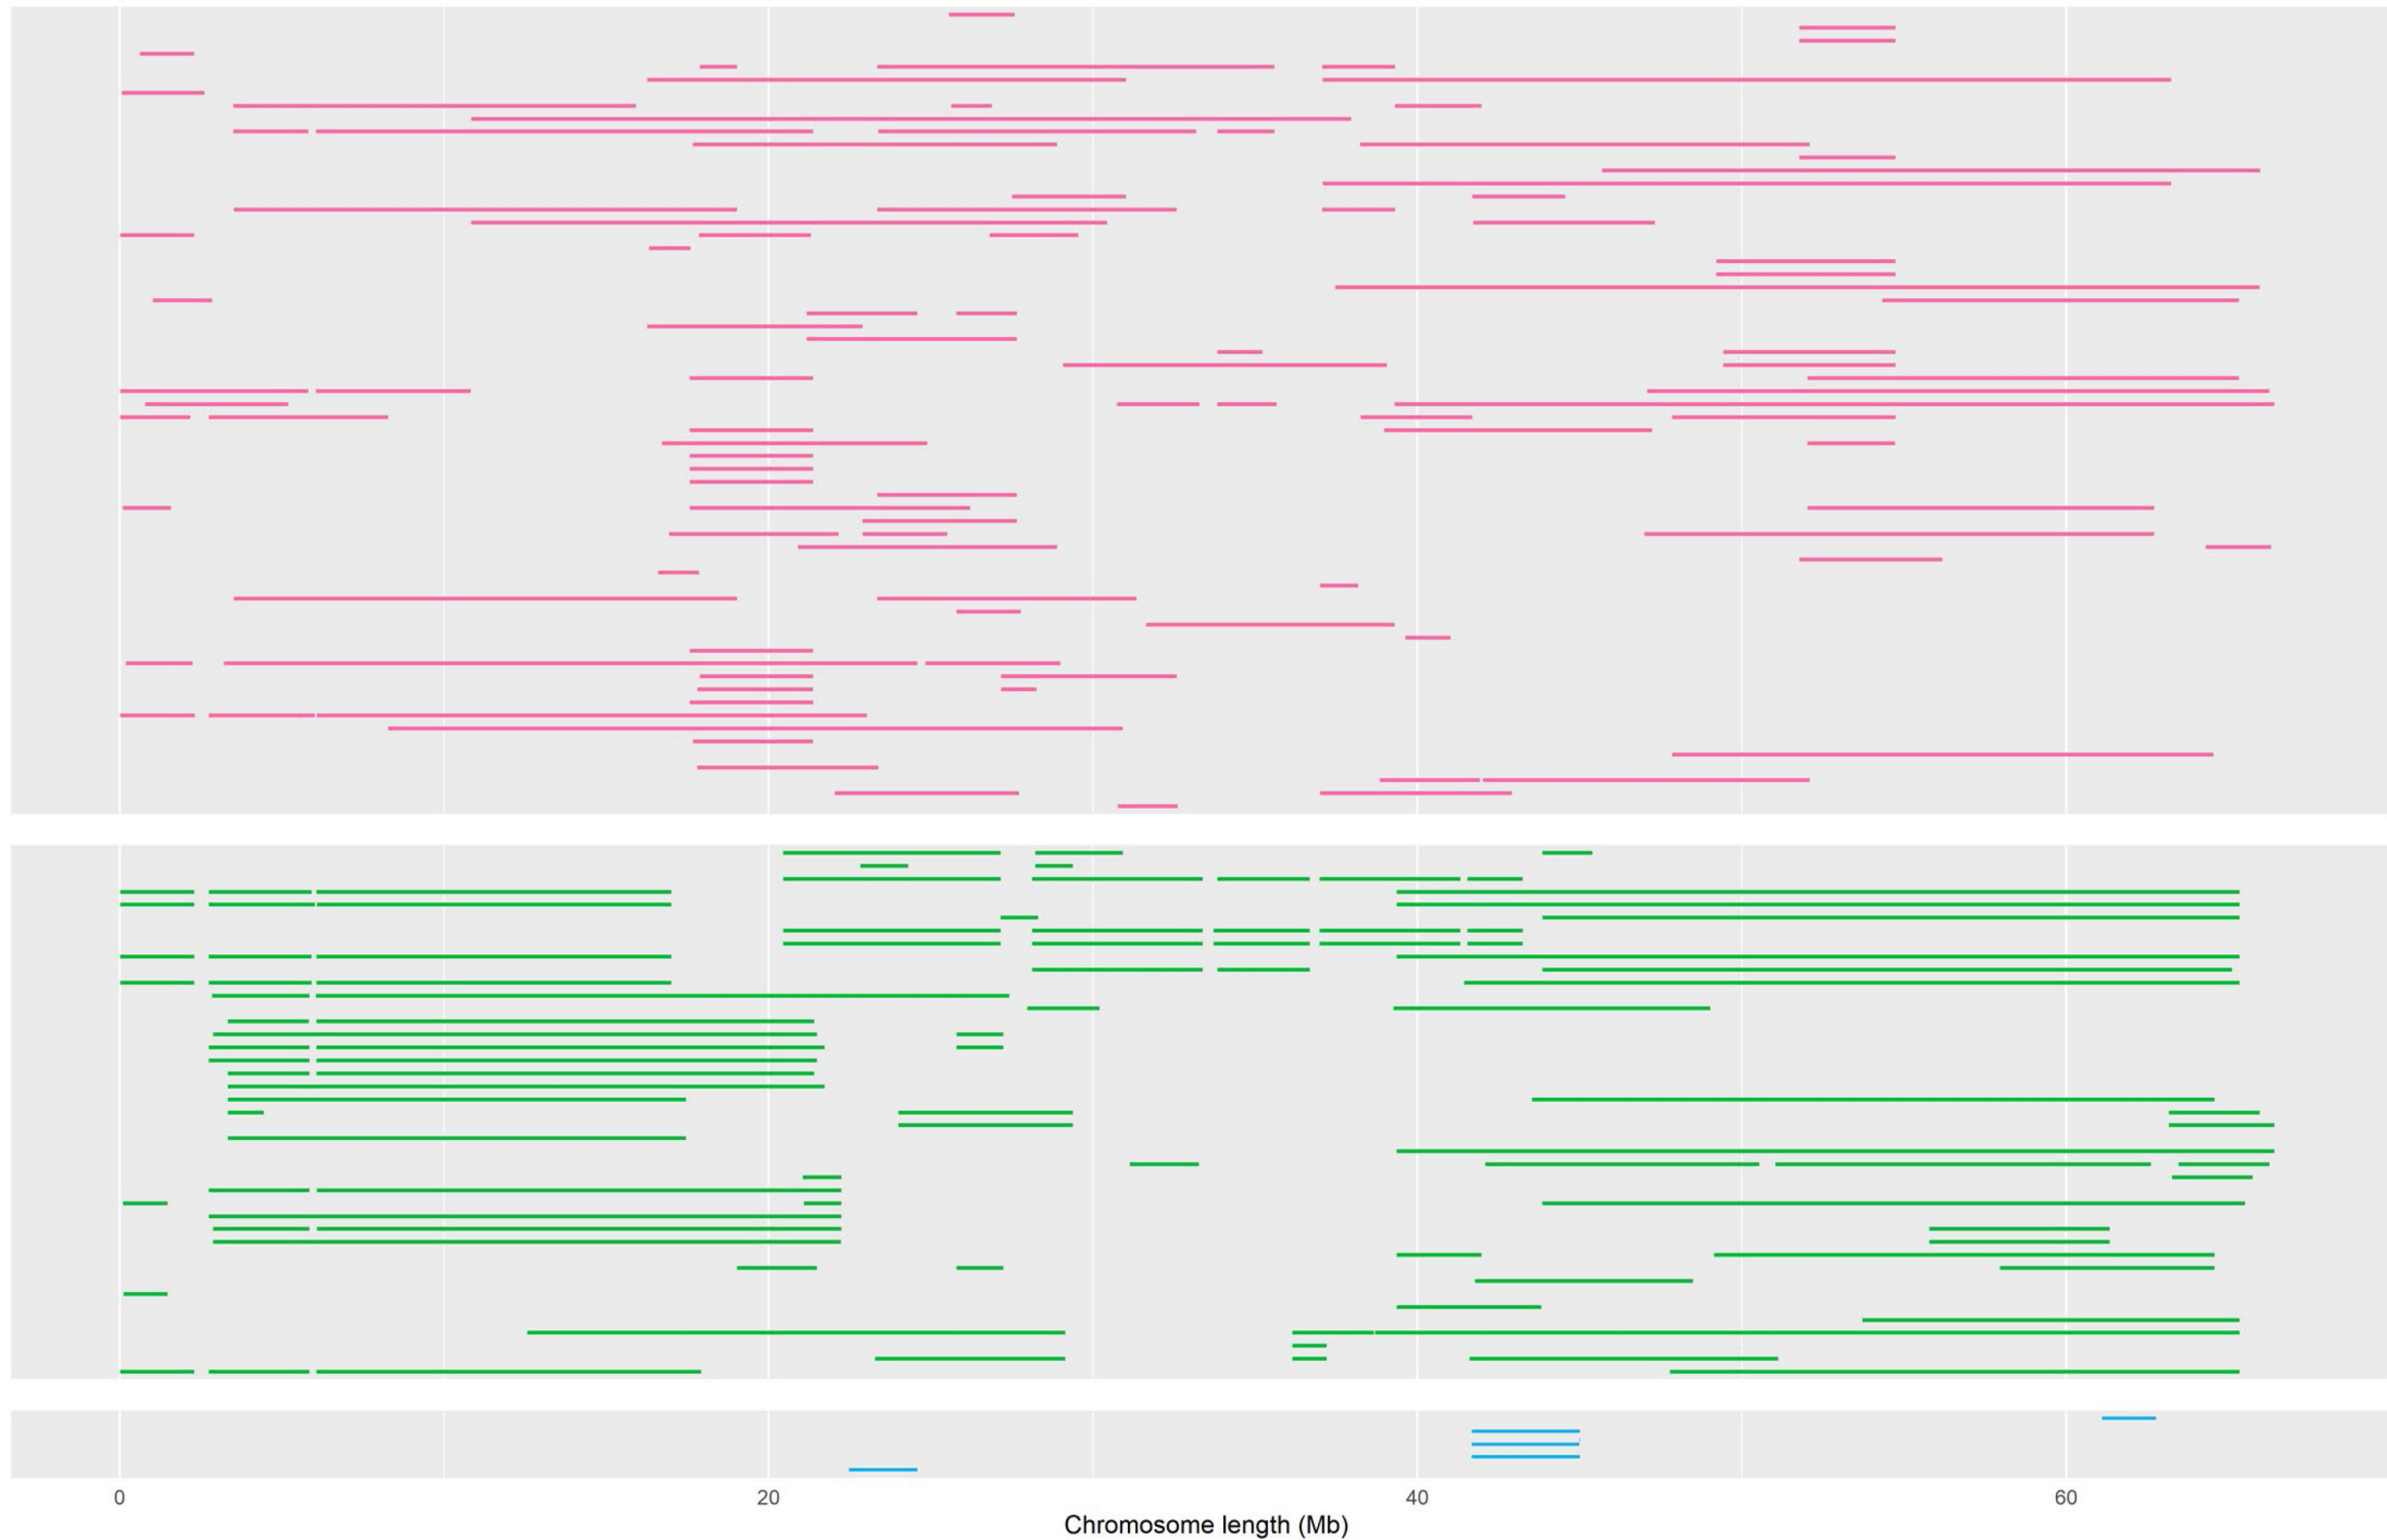

POP A POP B POP C

Chromosome Okis19

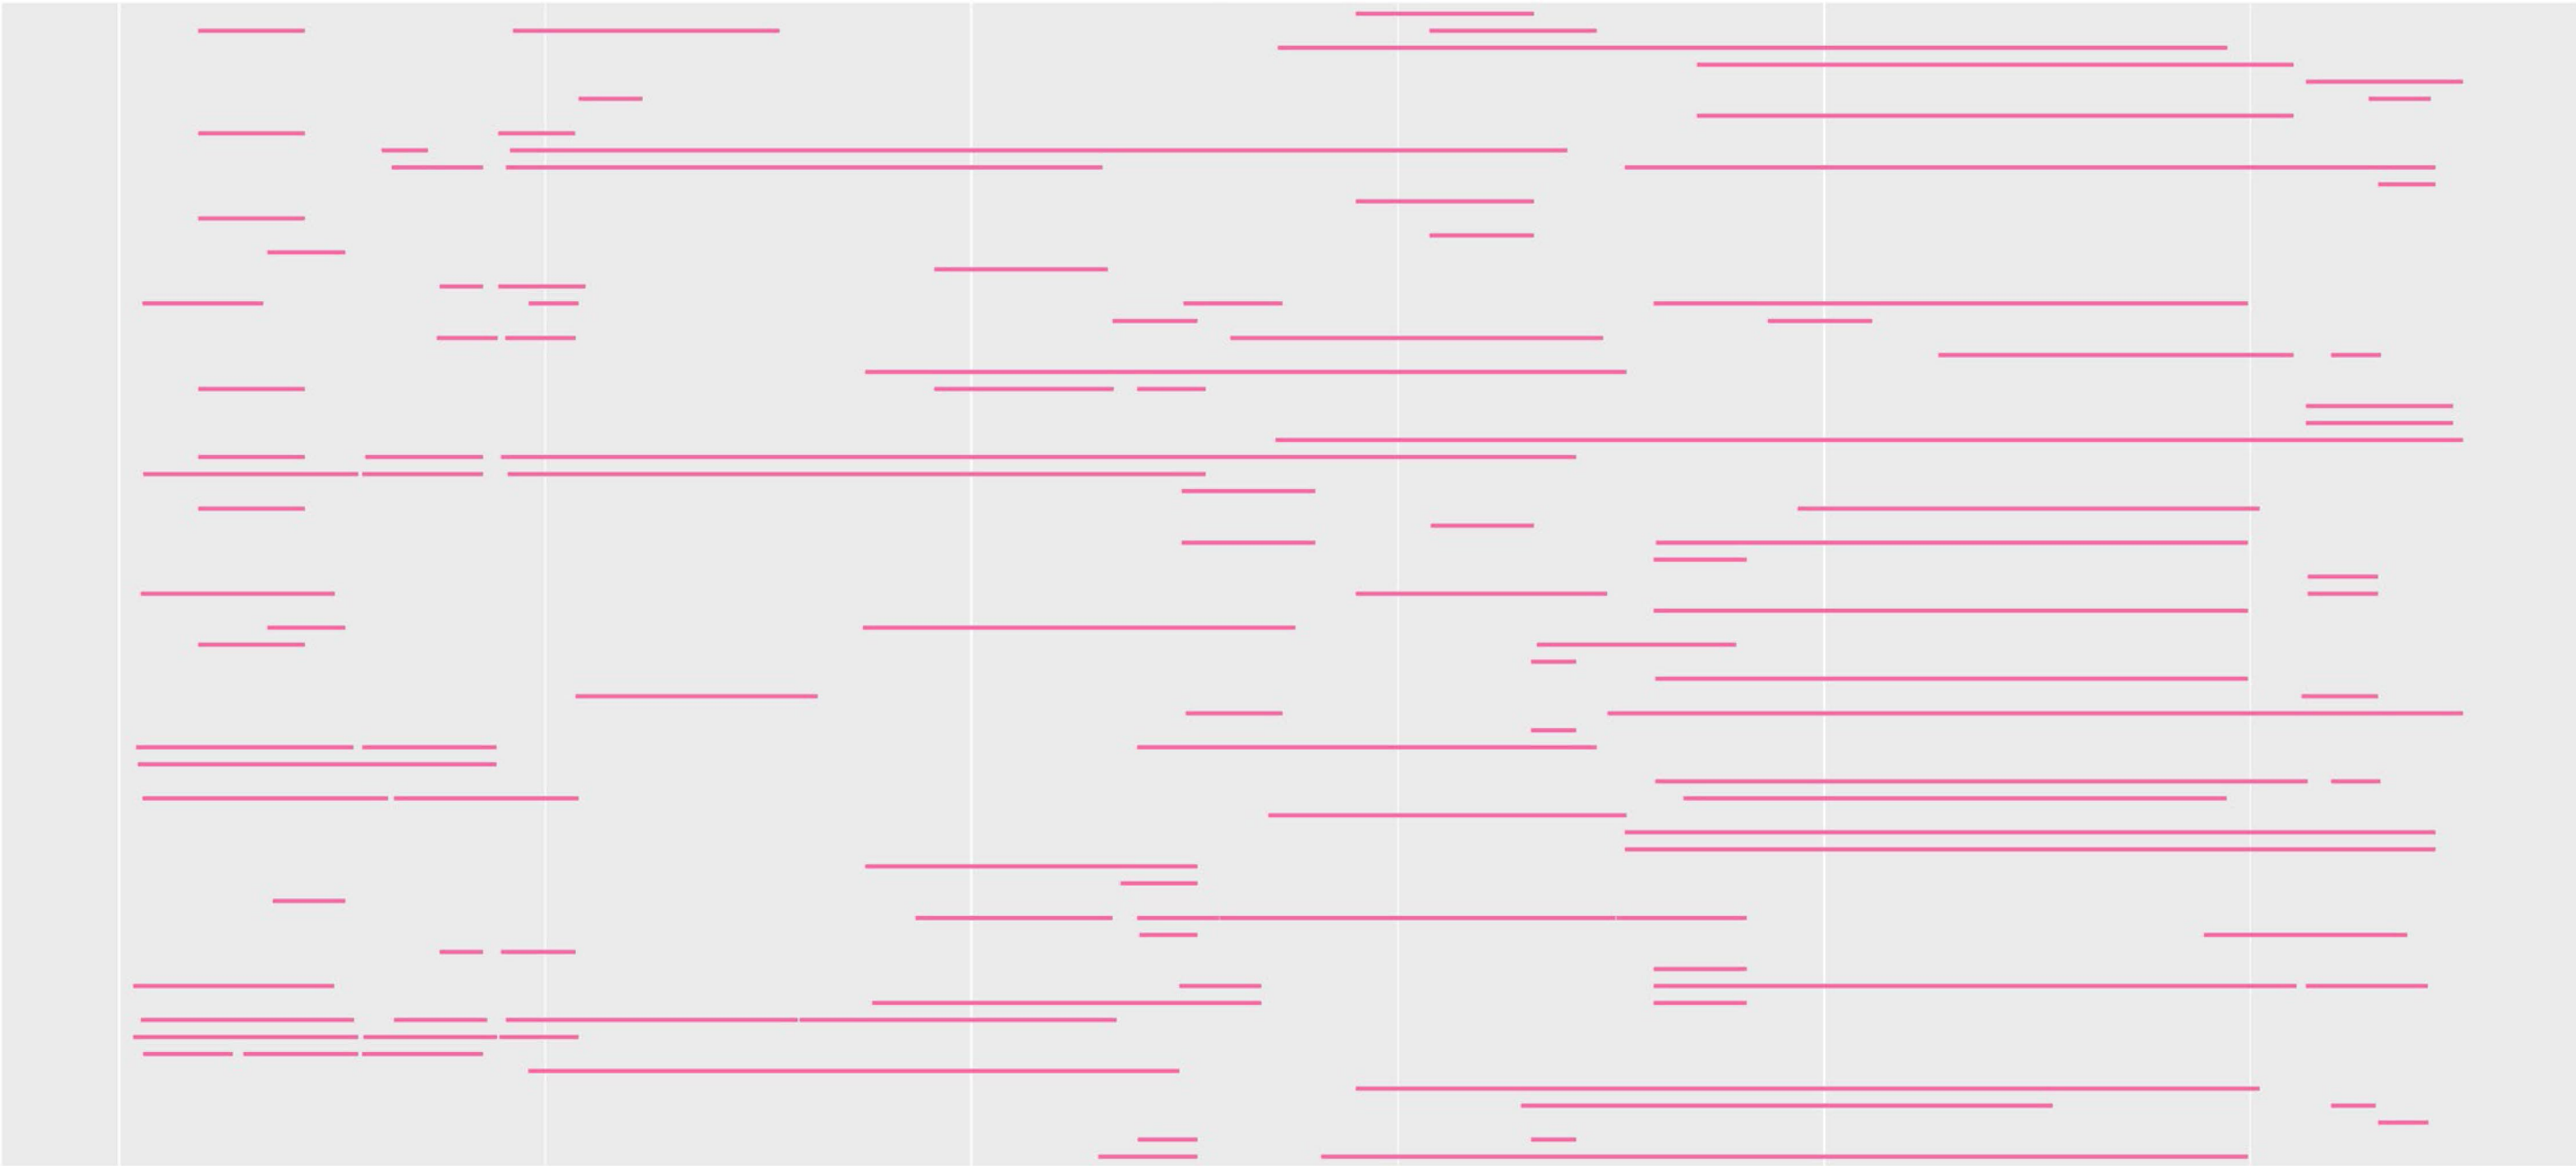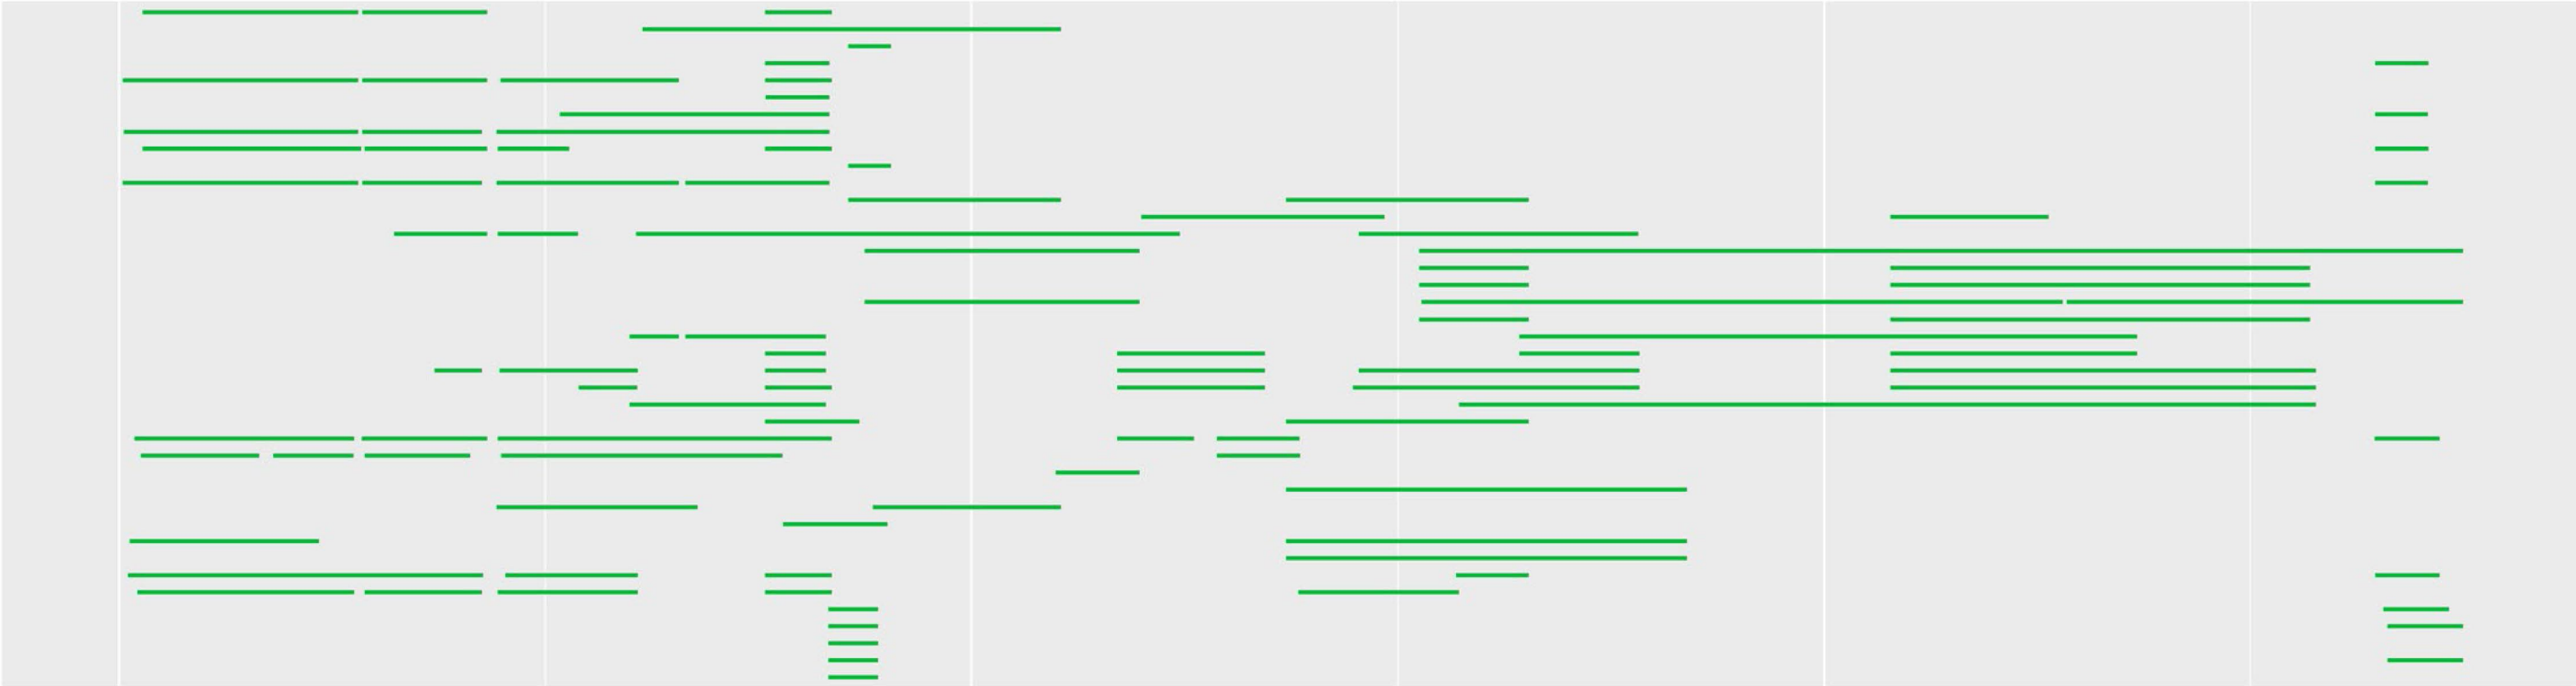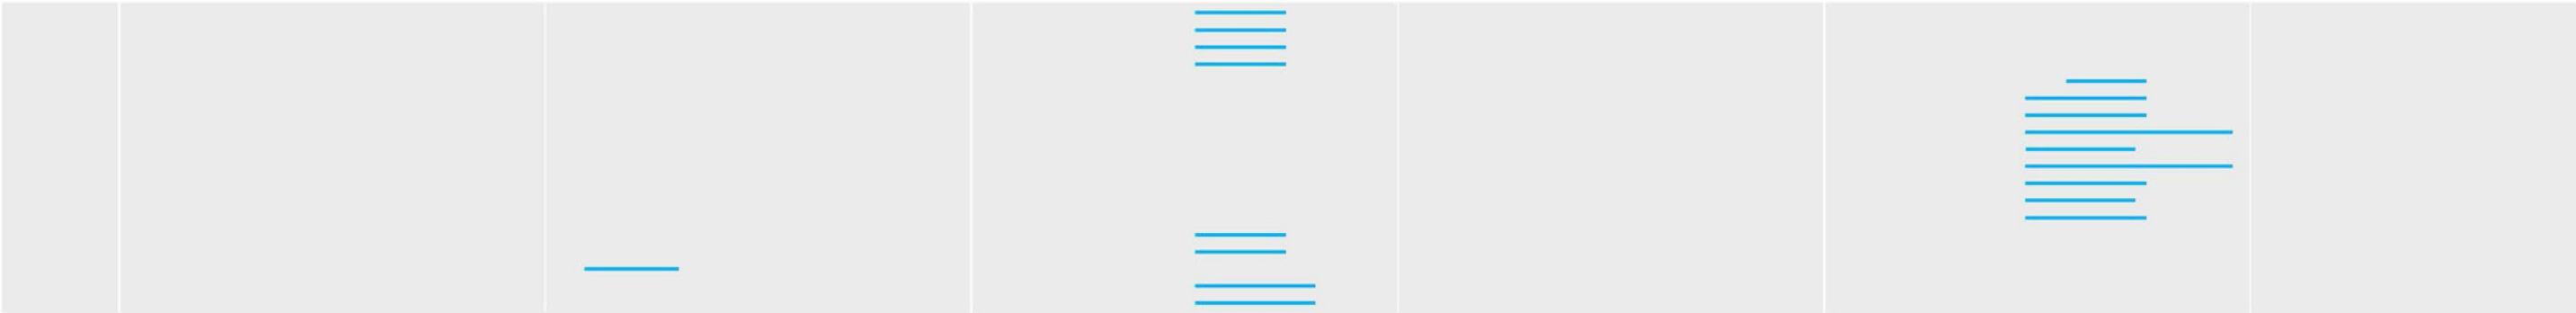

0

20

40

Chromosome length (Mb)

POP A POP B POP C



Chromosome Okis20

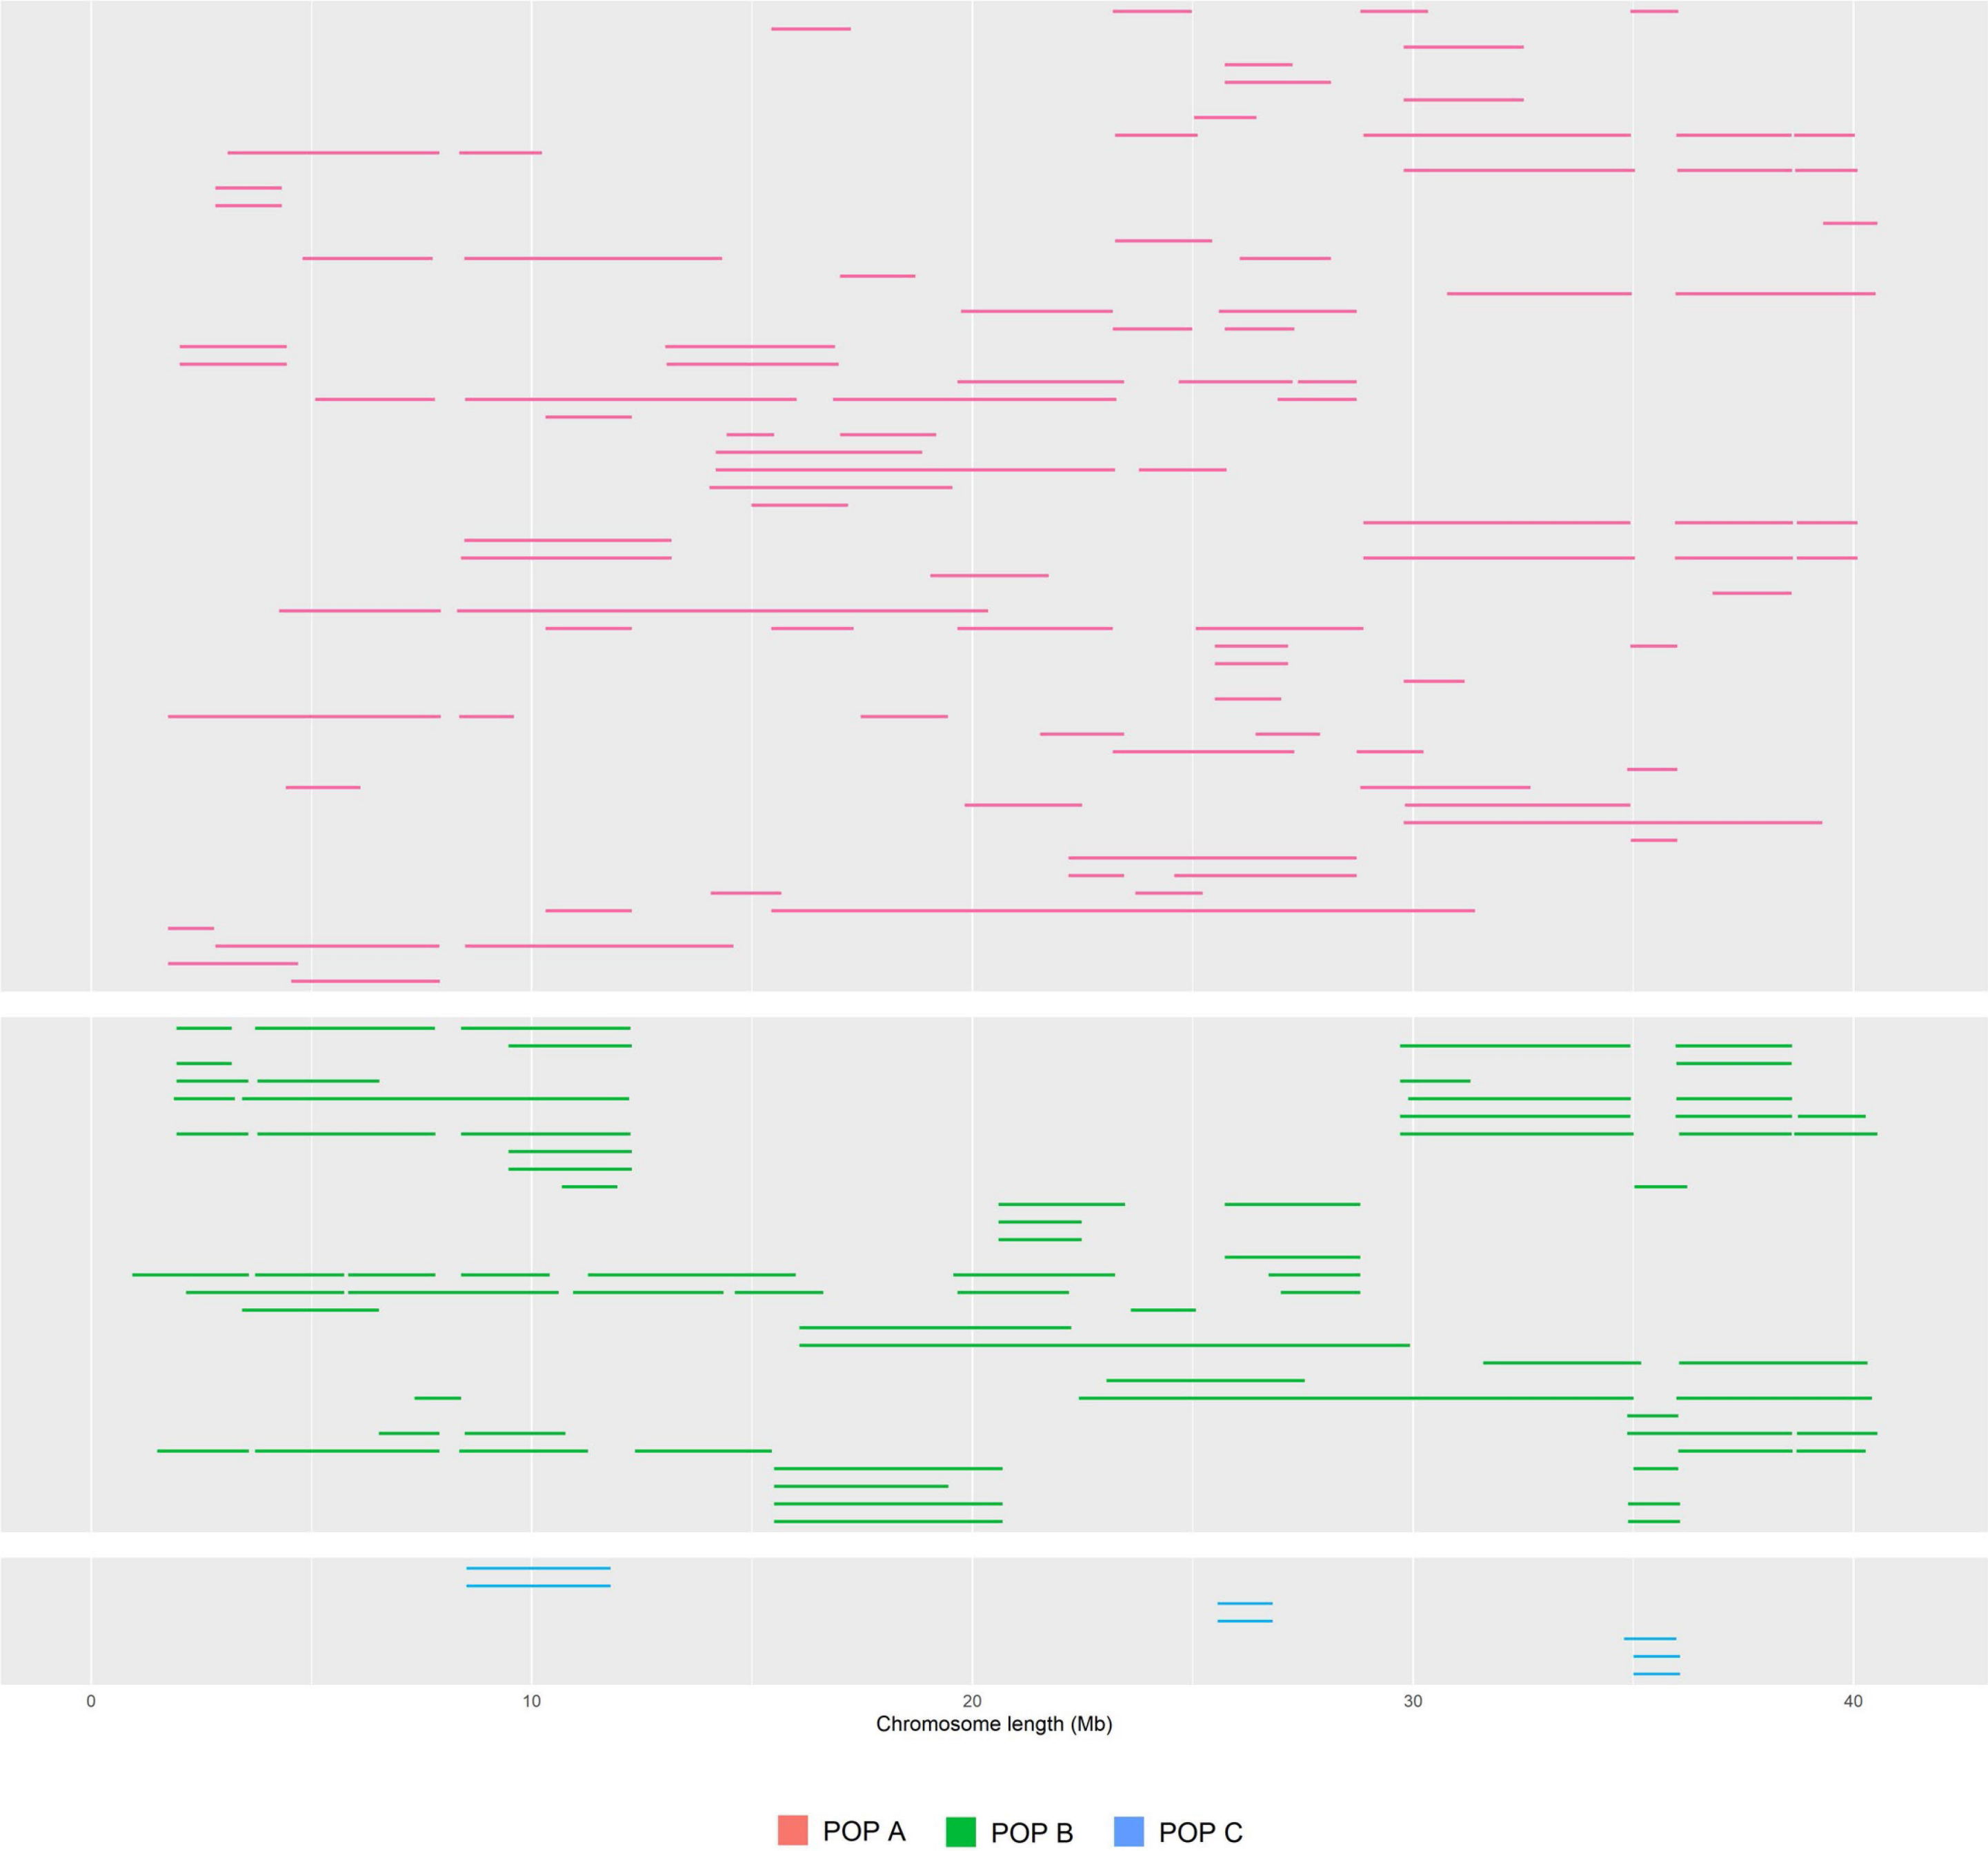



Chromosome Okis21

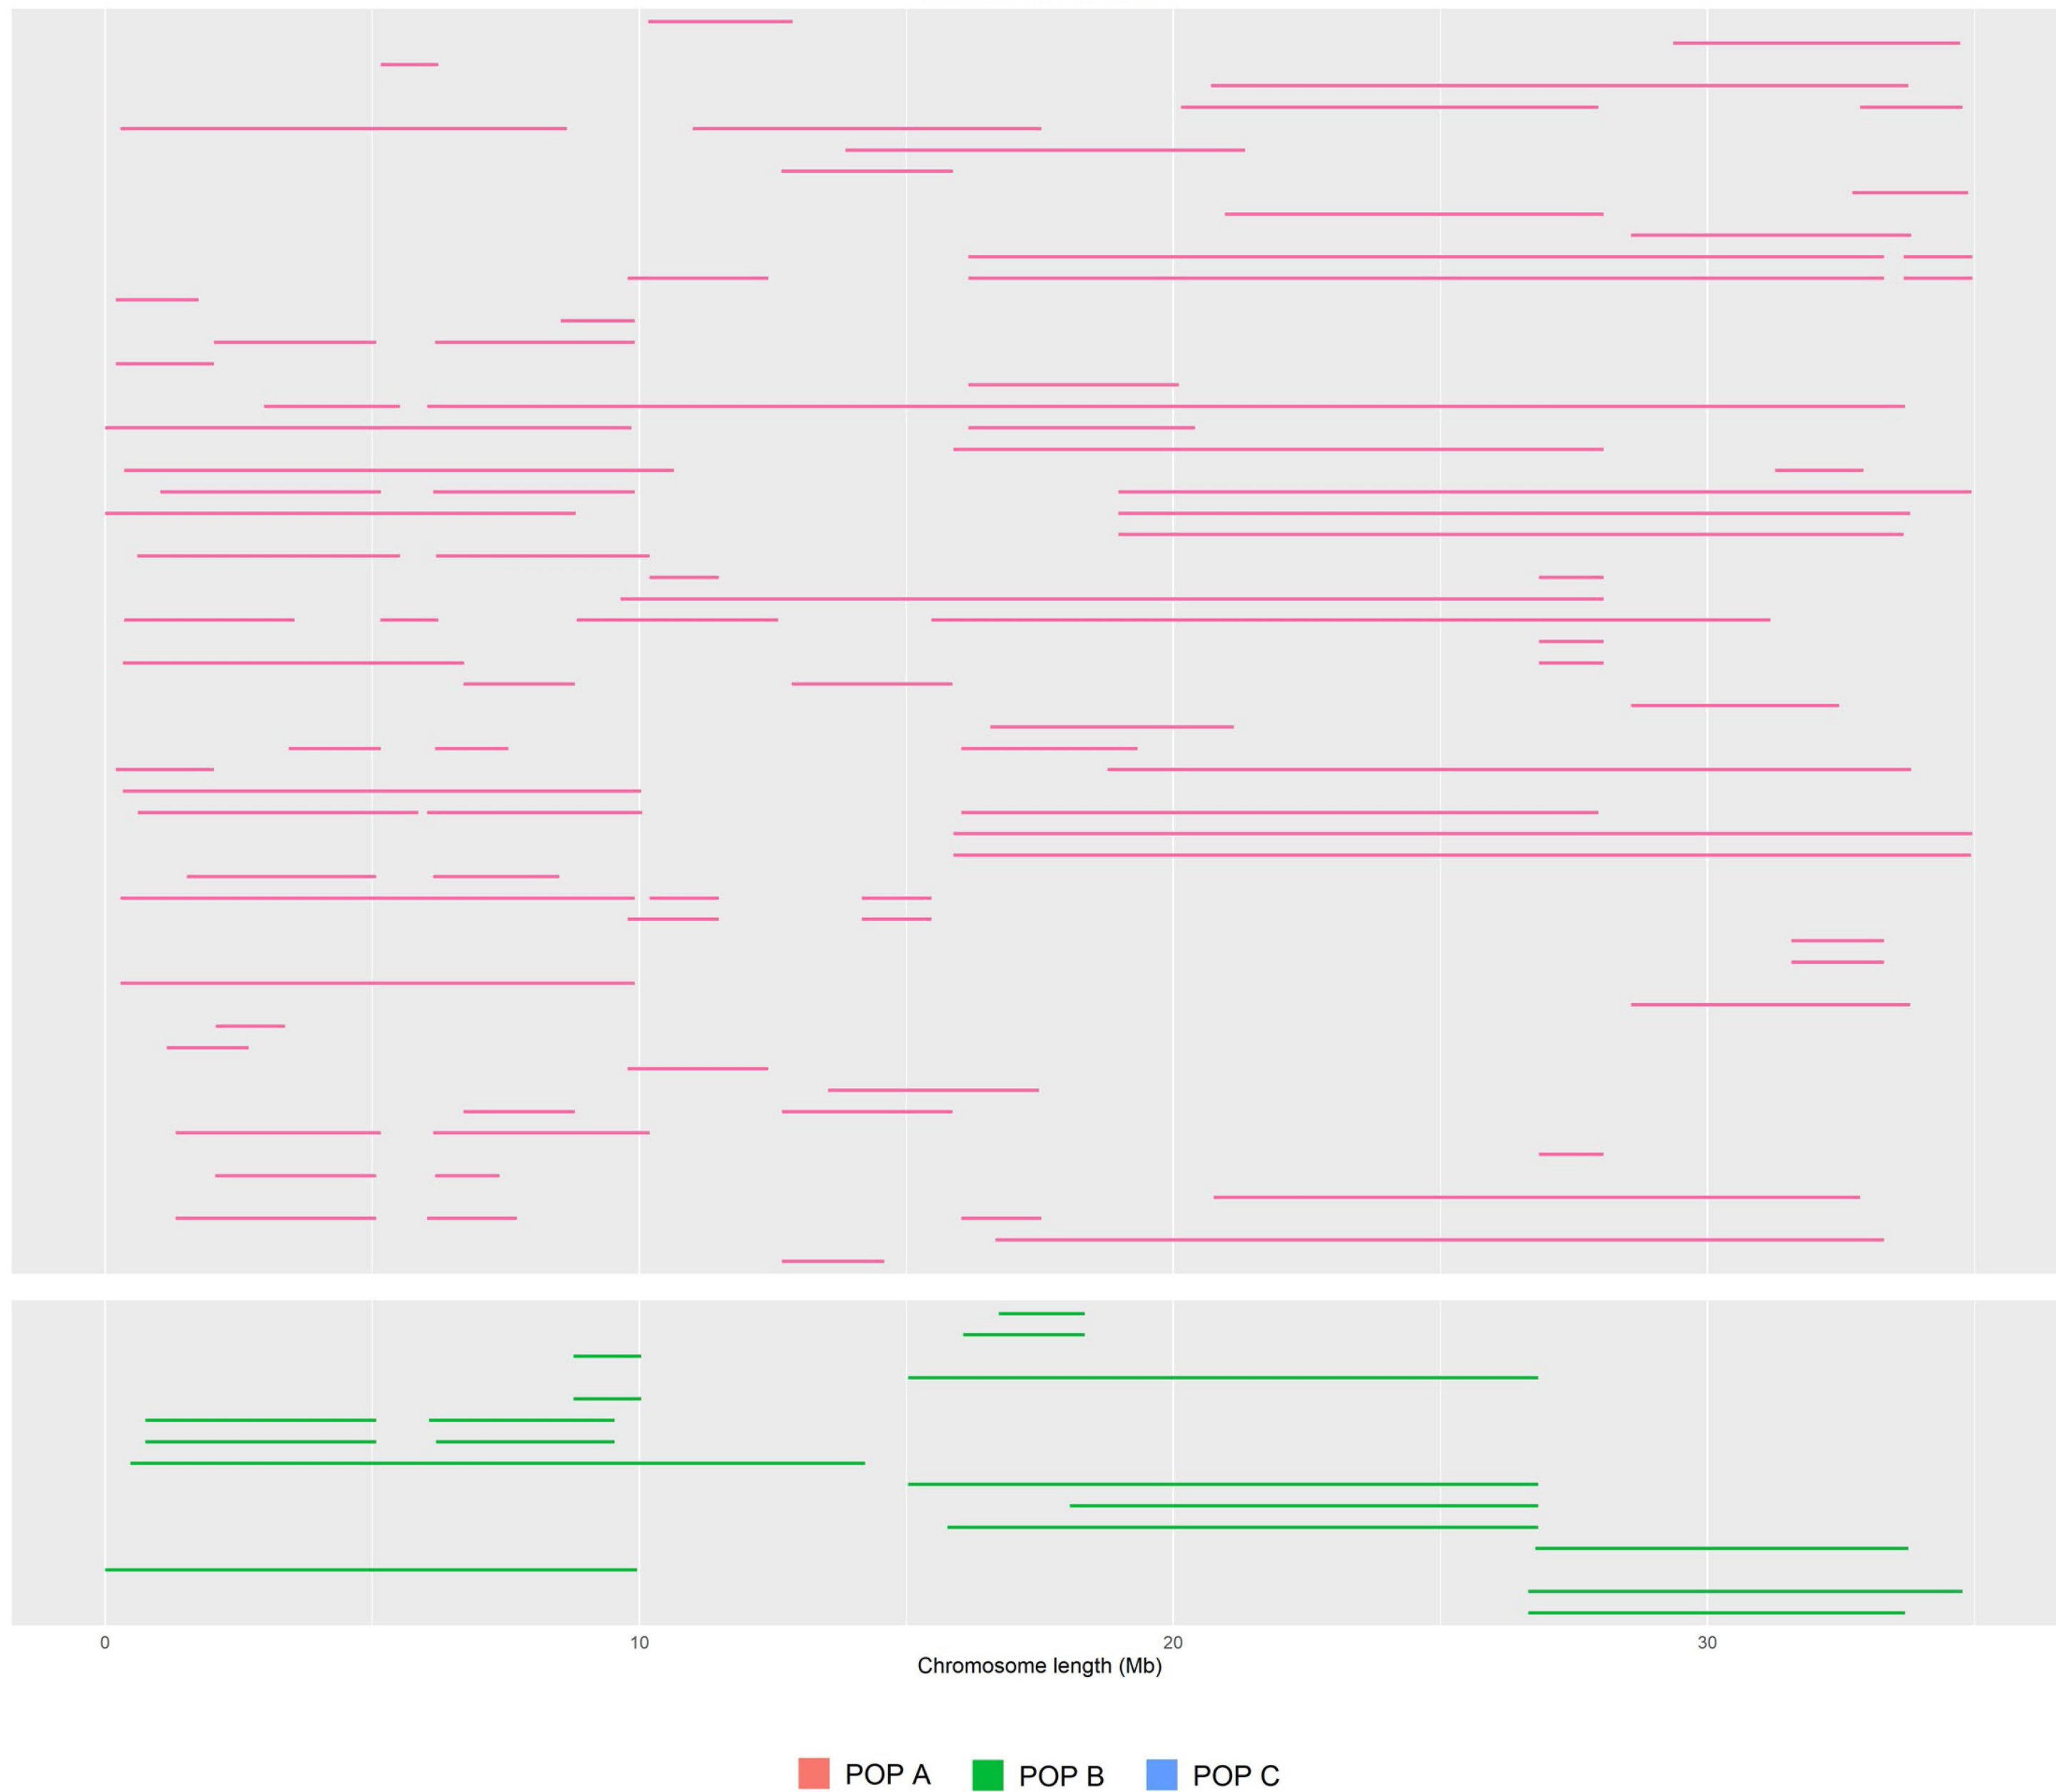

Chromosome Okis22

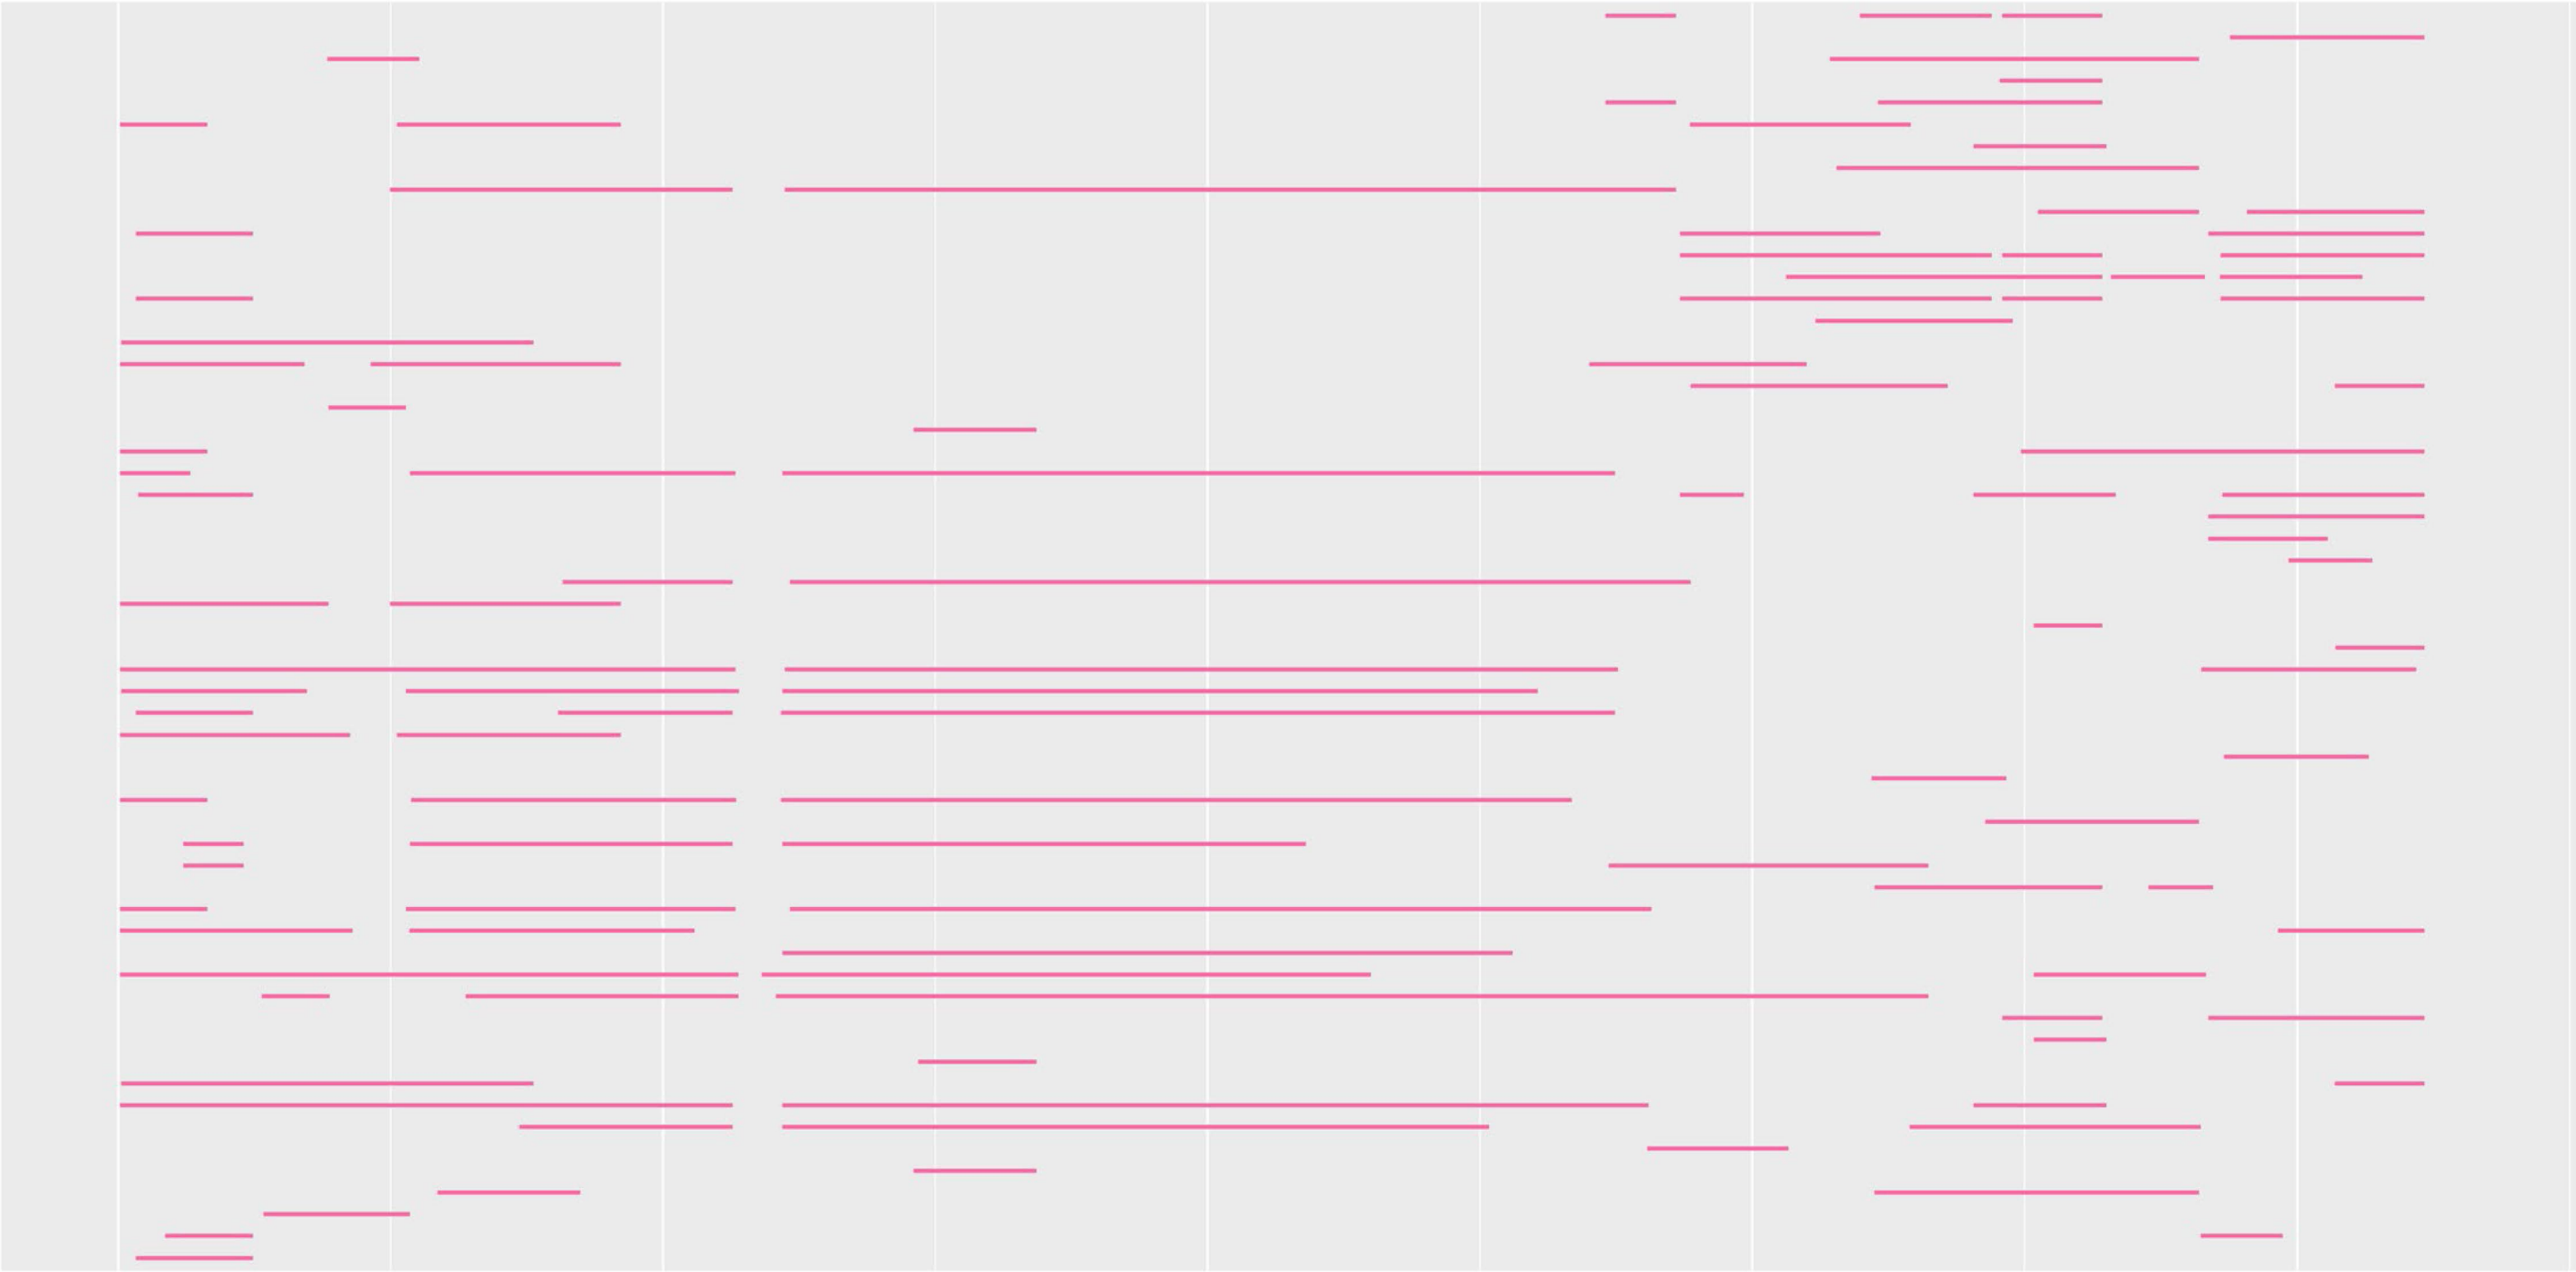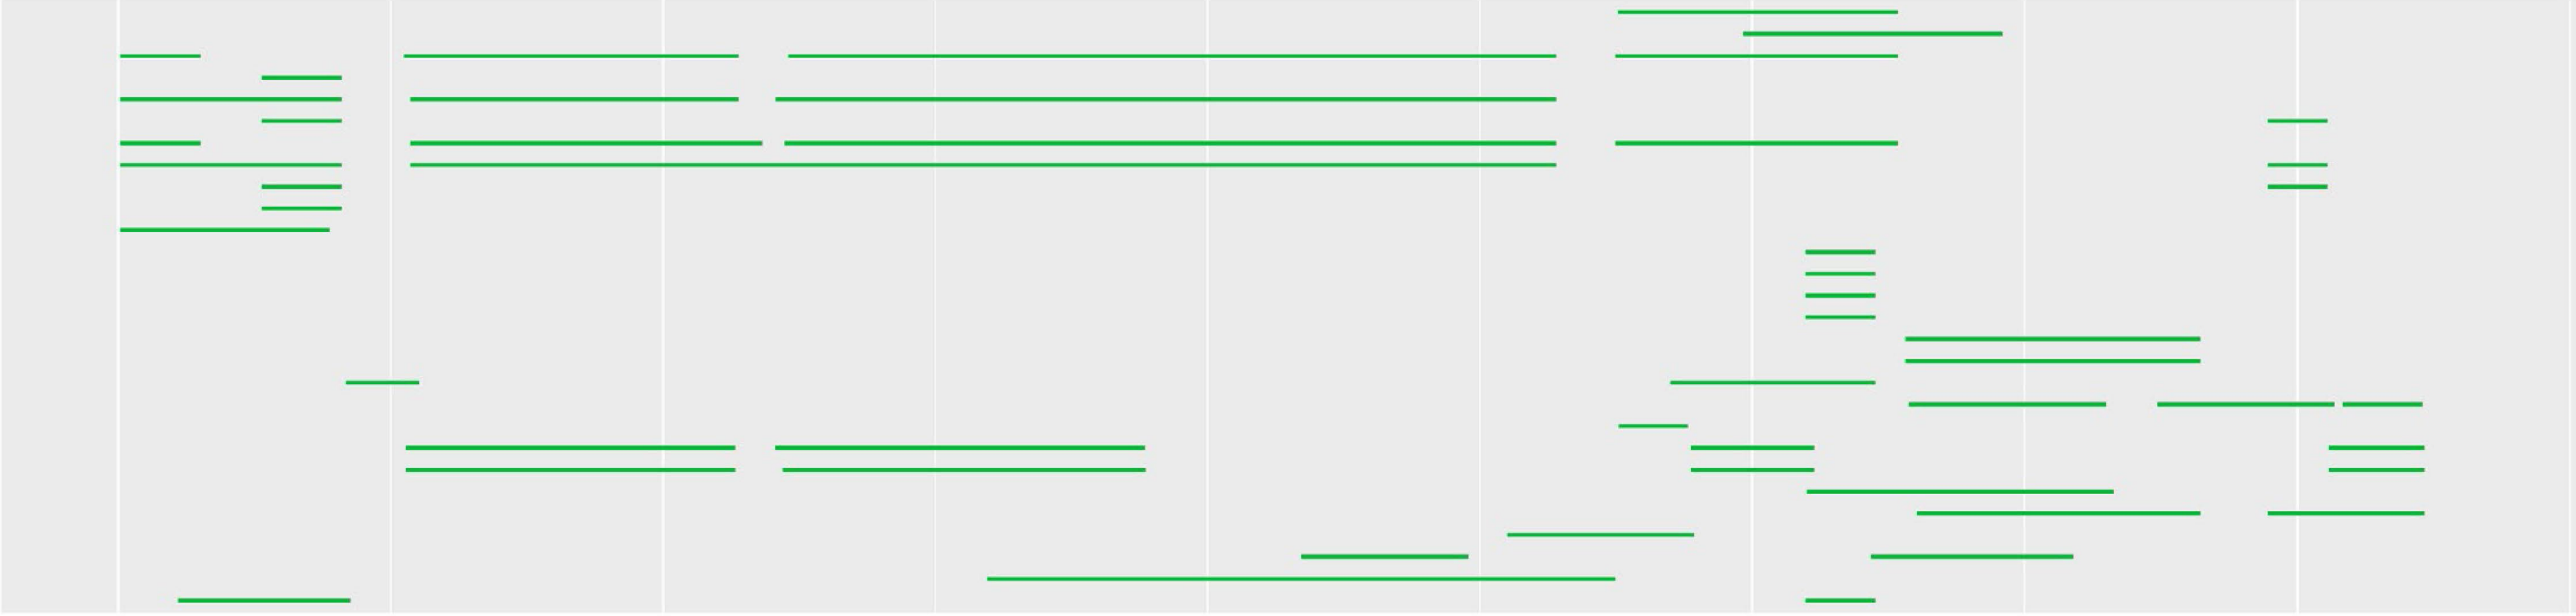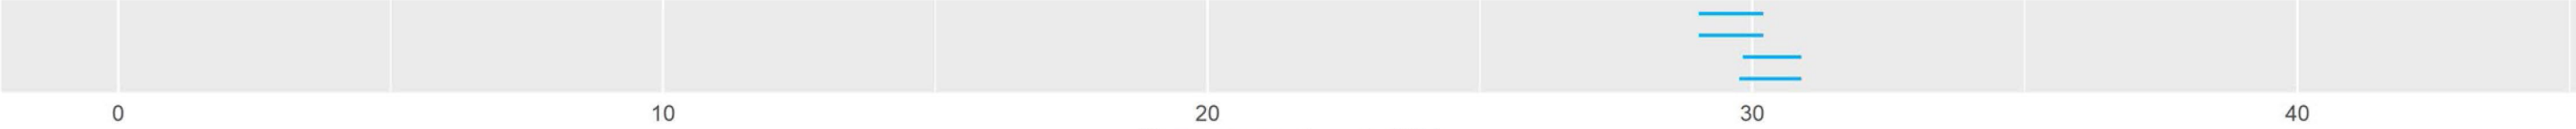

Chromosome length (Mb)

POP A POP B POP C

Chromosome Okis23

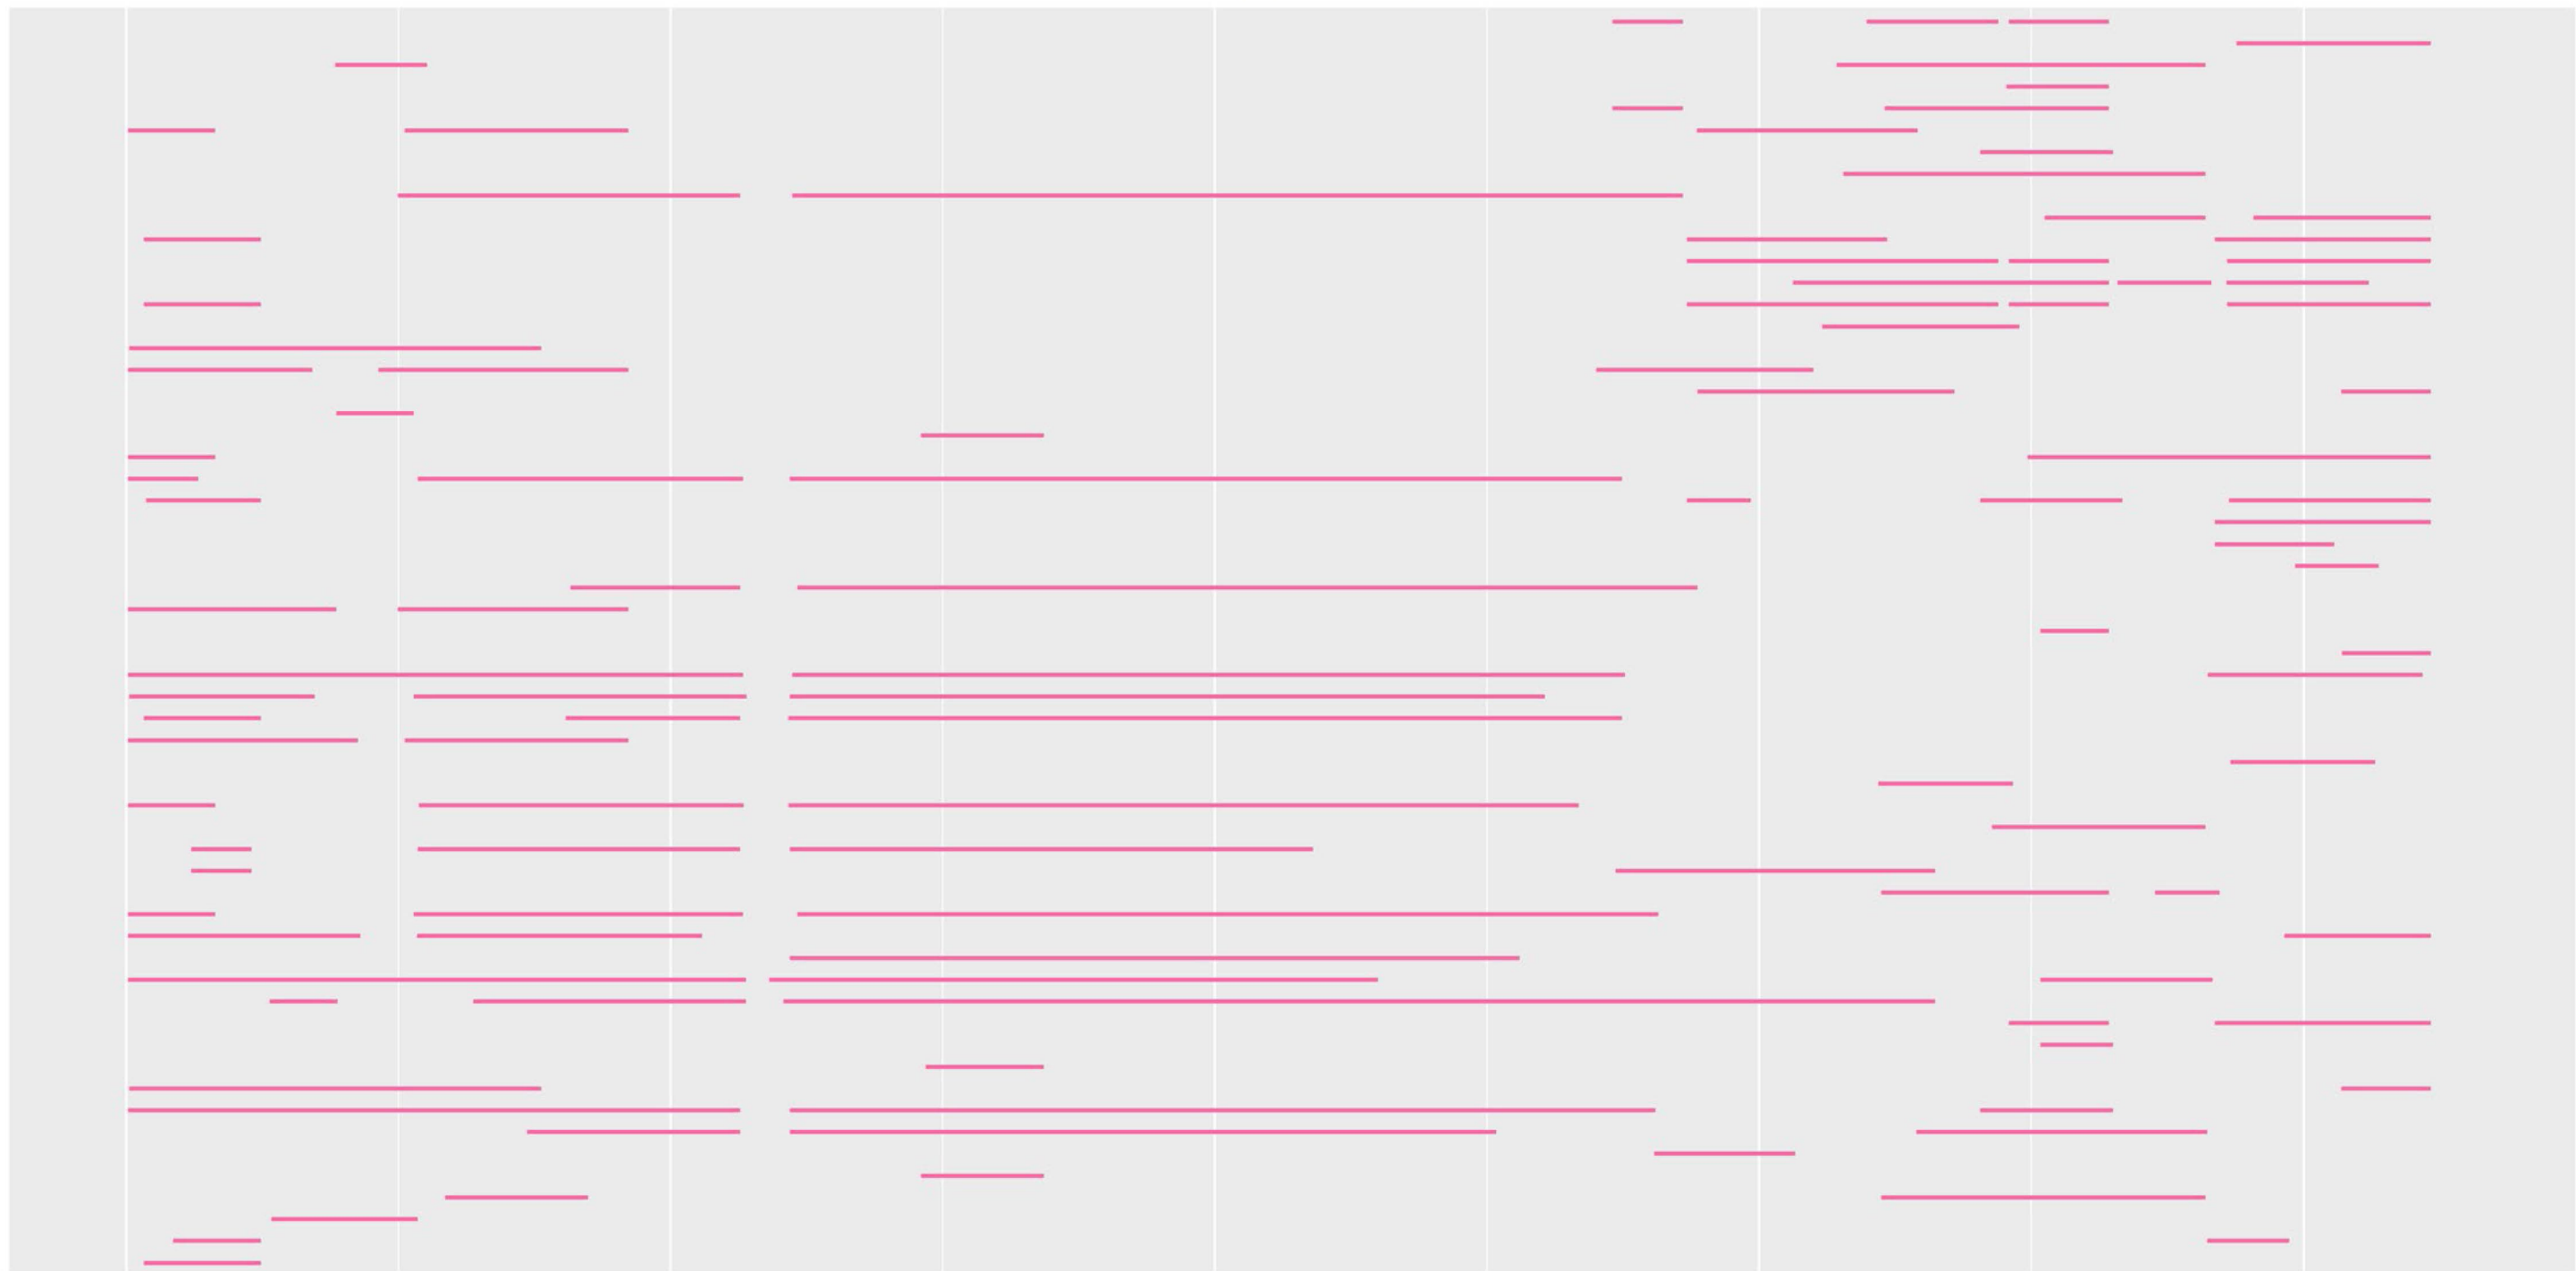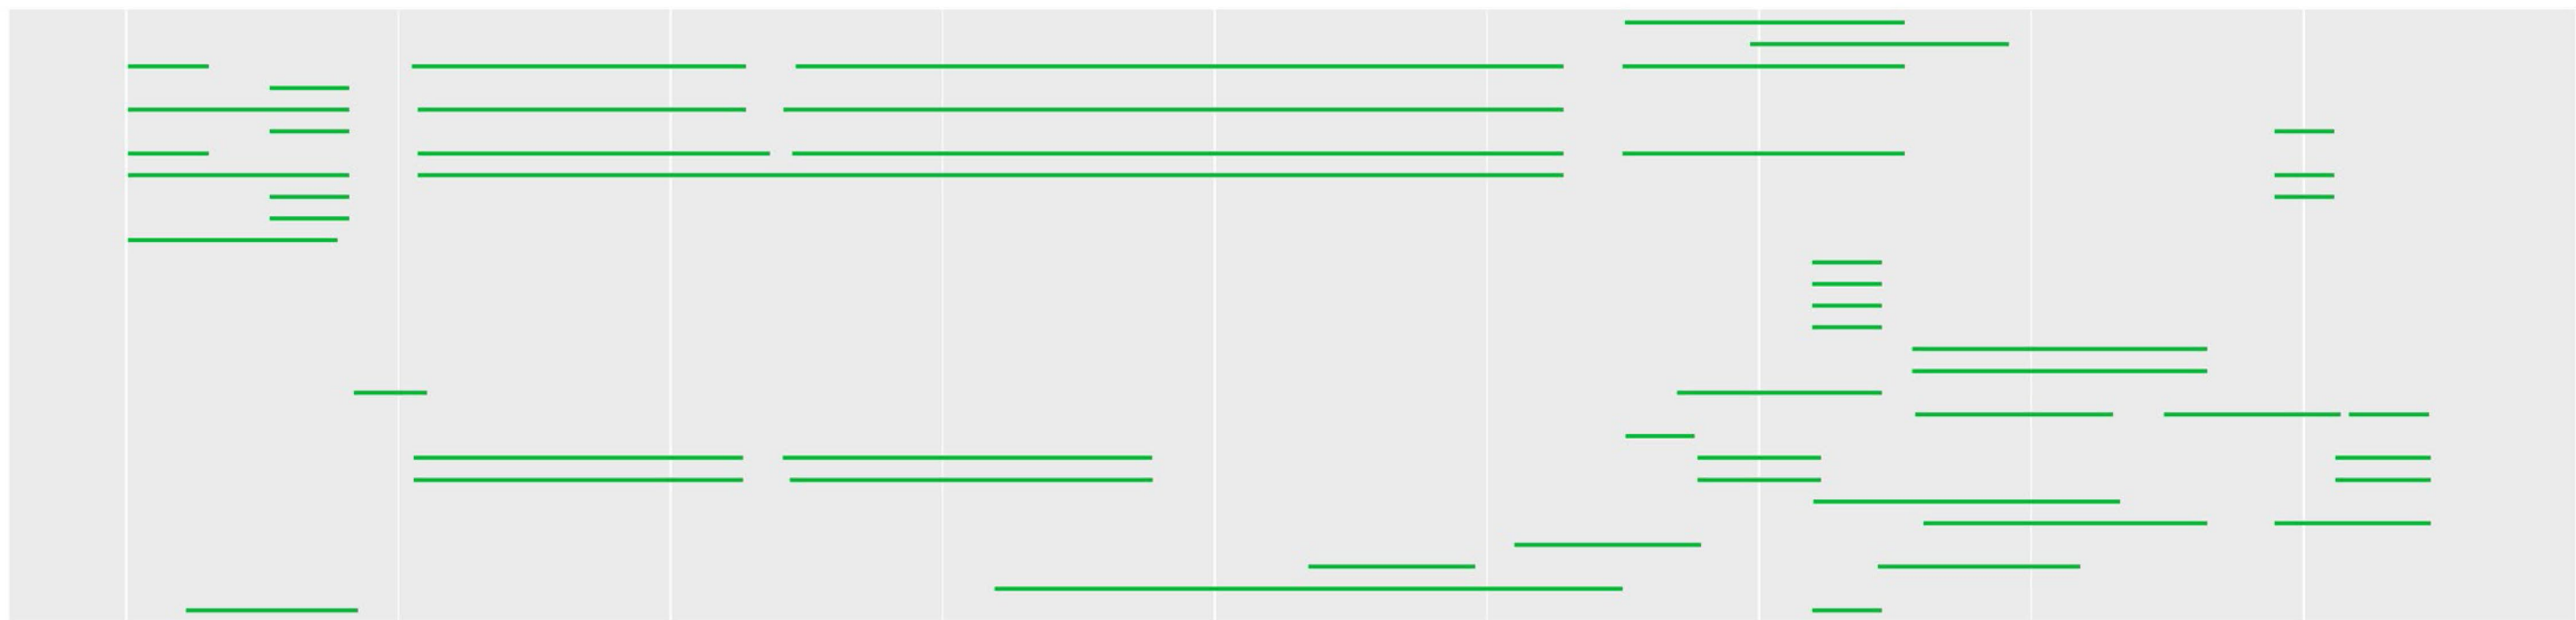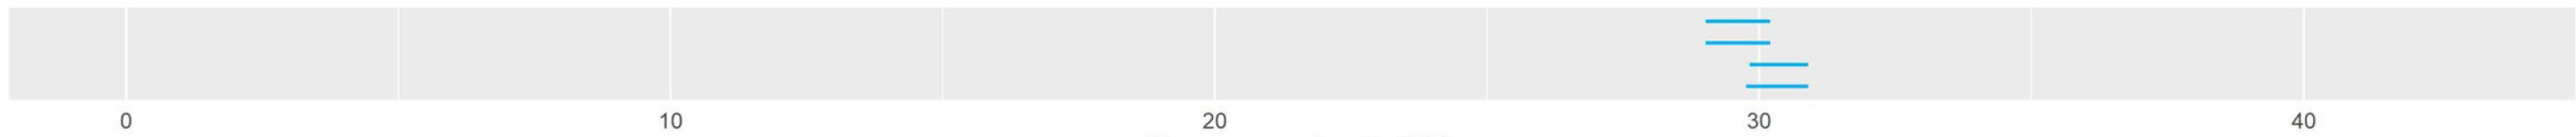

POP A POP B POP C

Chromosome Okis24

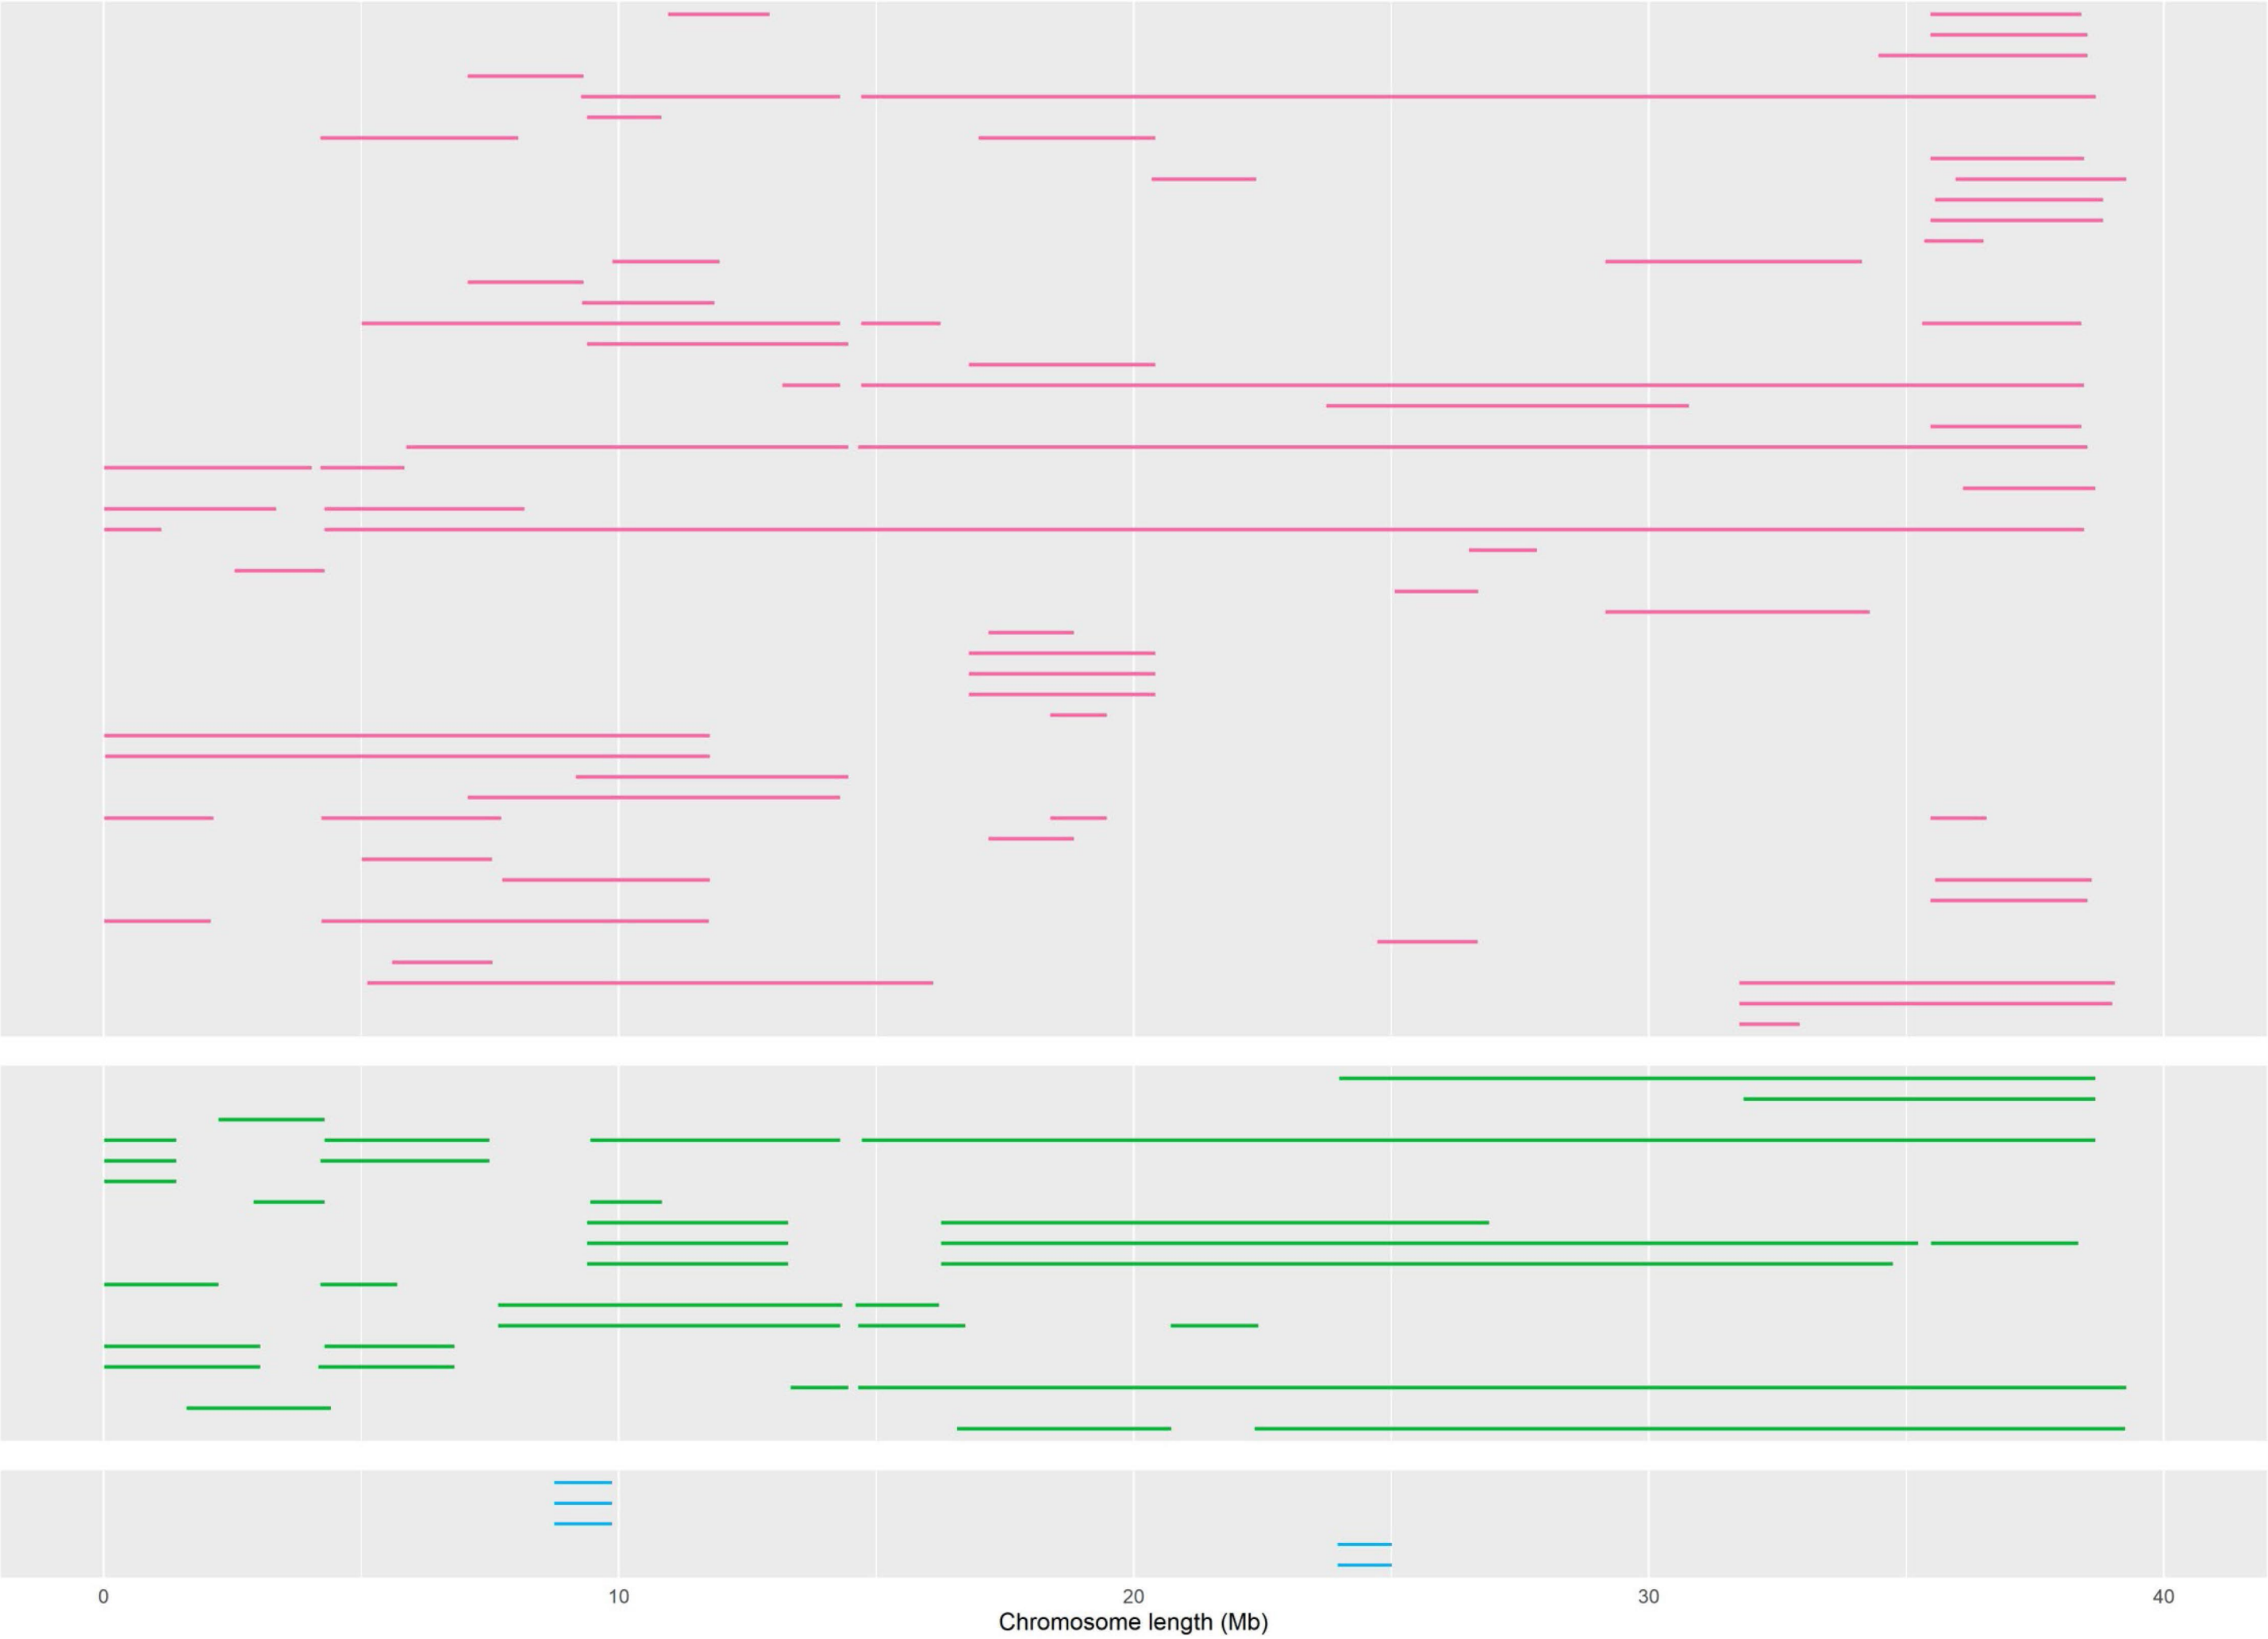

POP A POP B POP C

Chromosome Okis25

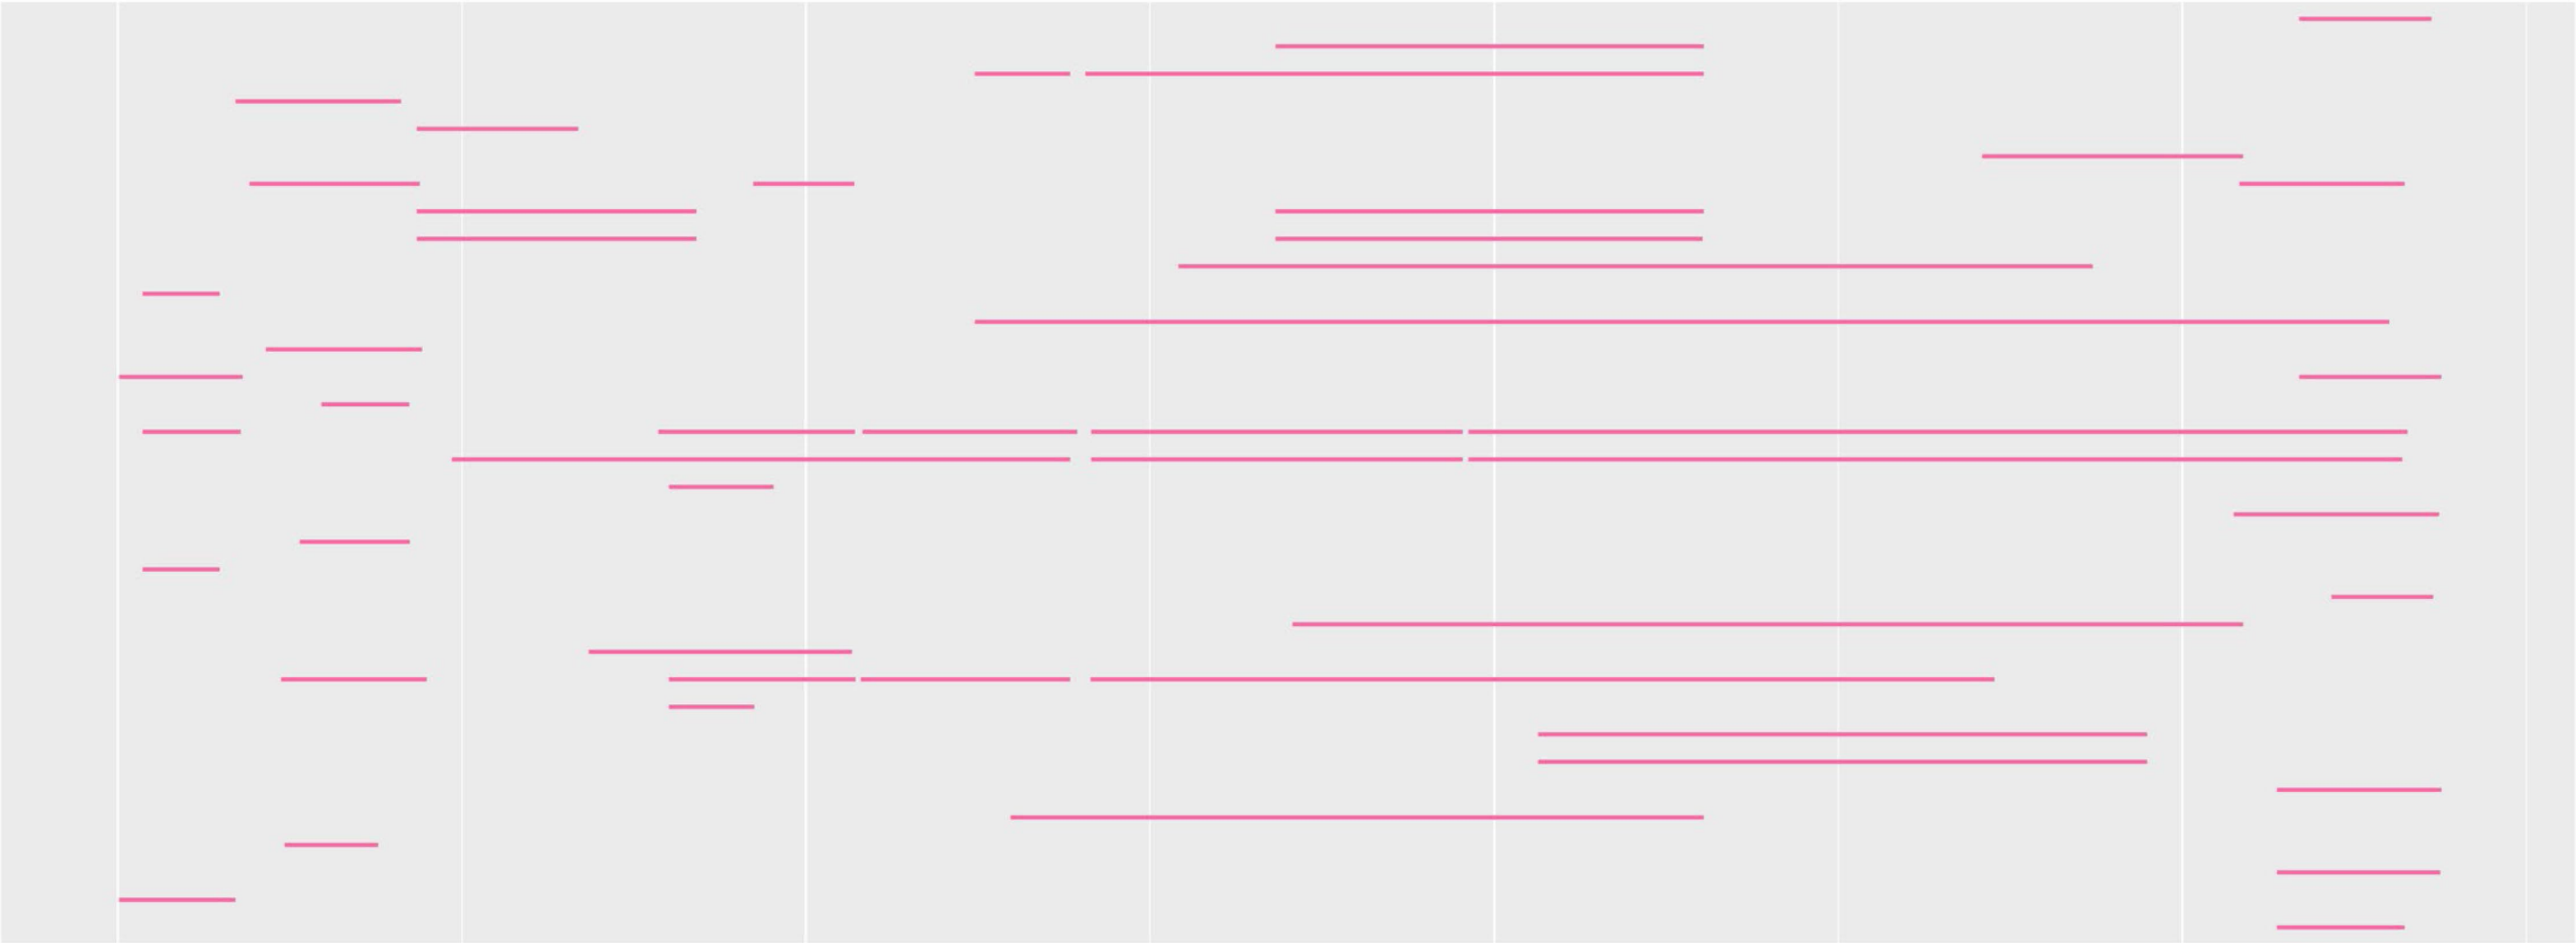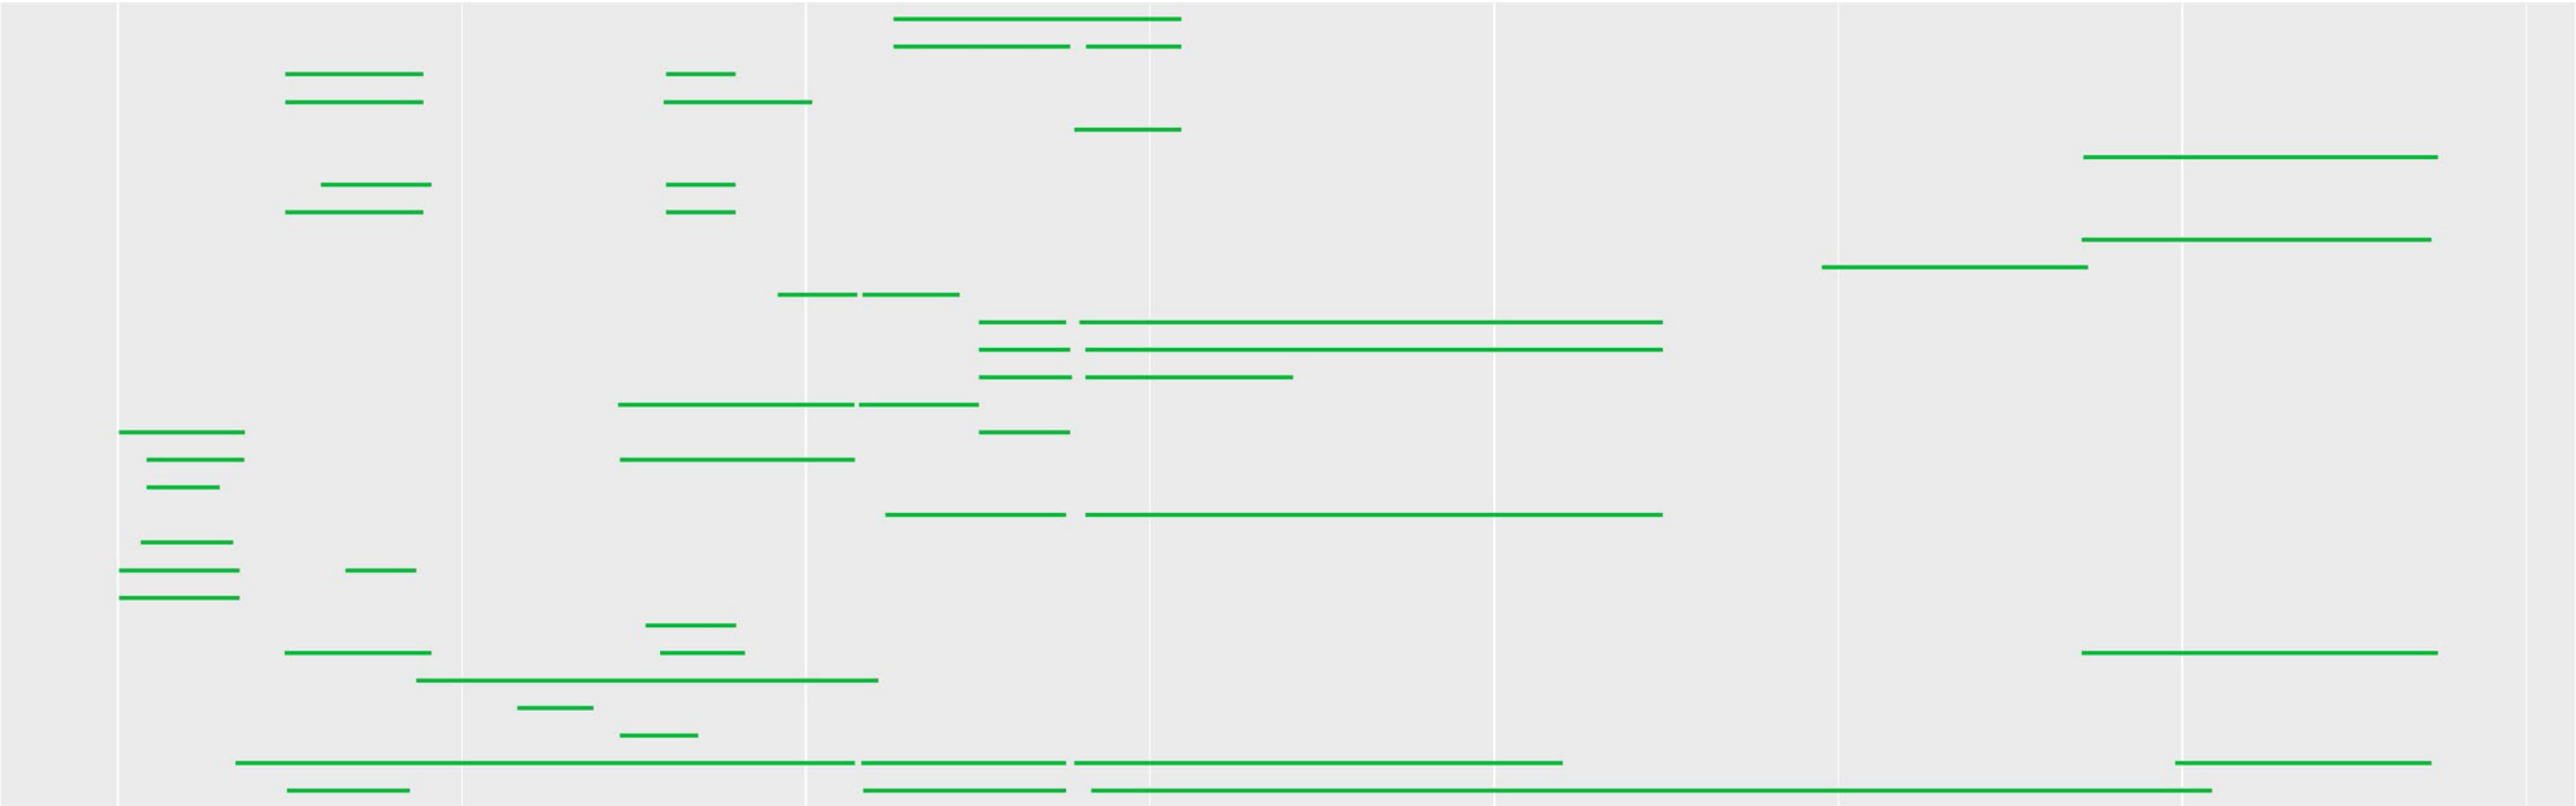

POP A POP B POP C

Chromosome Okis26

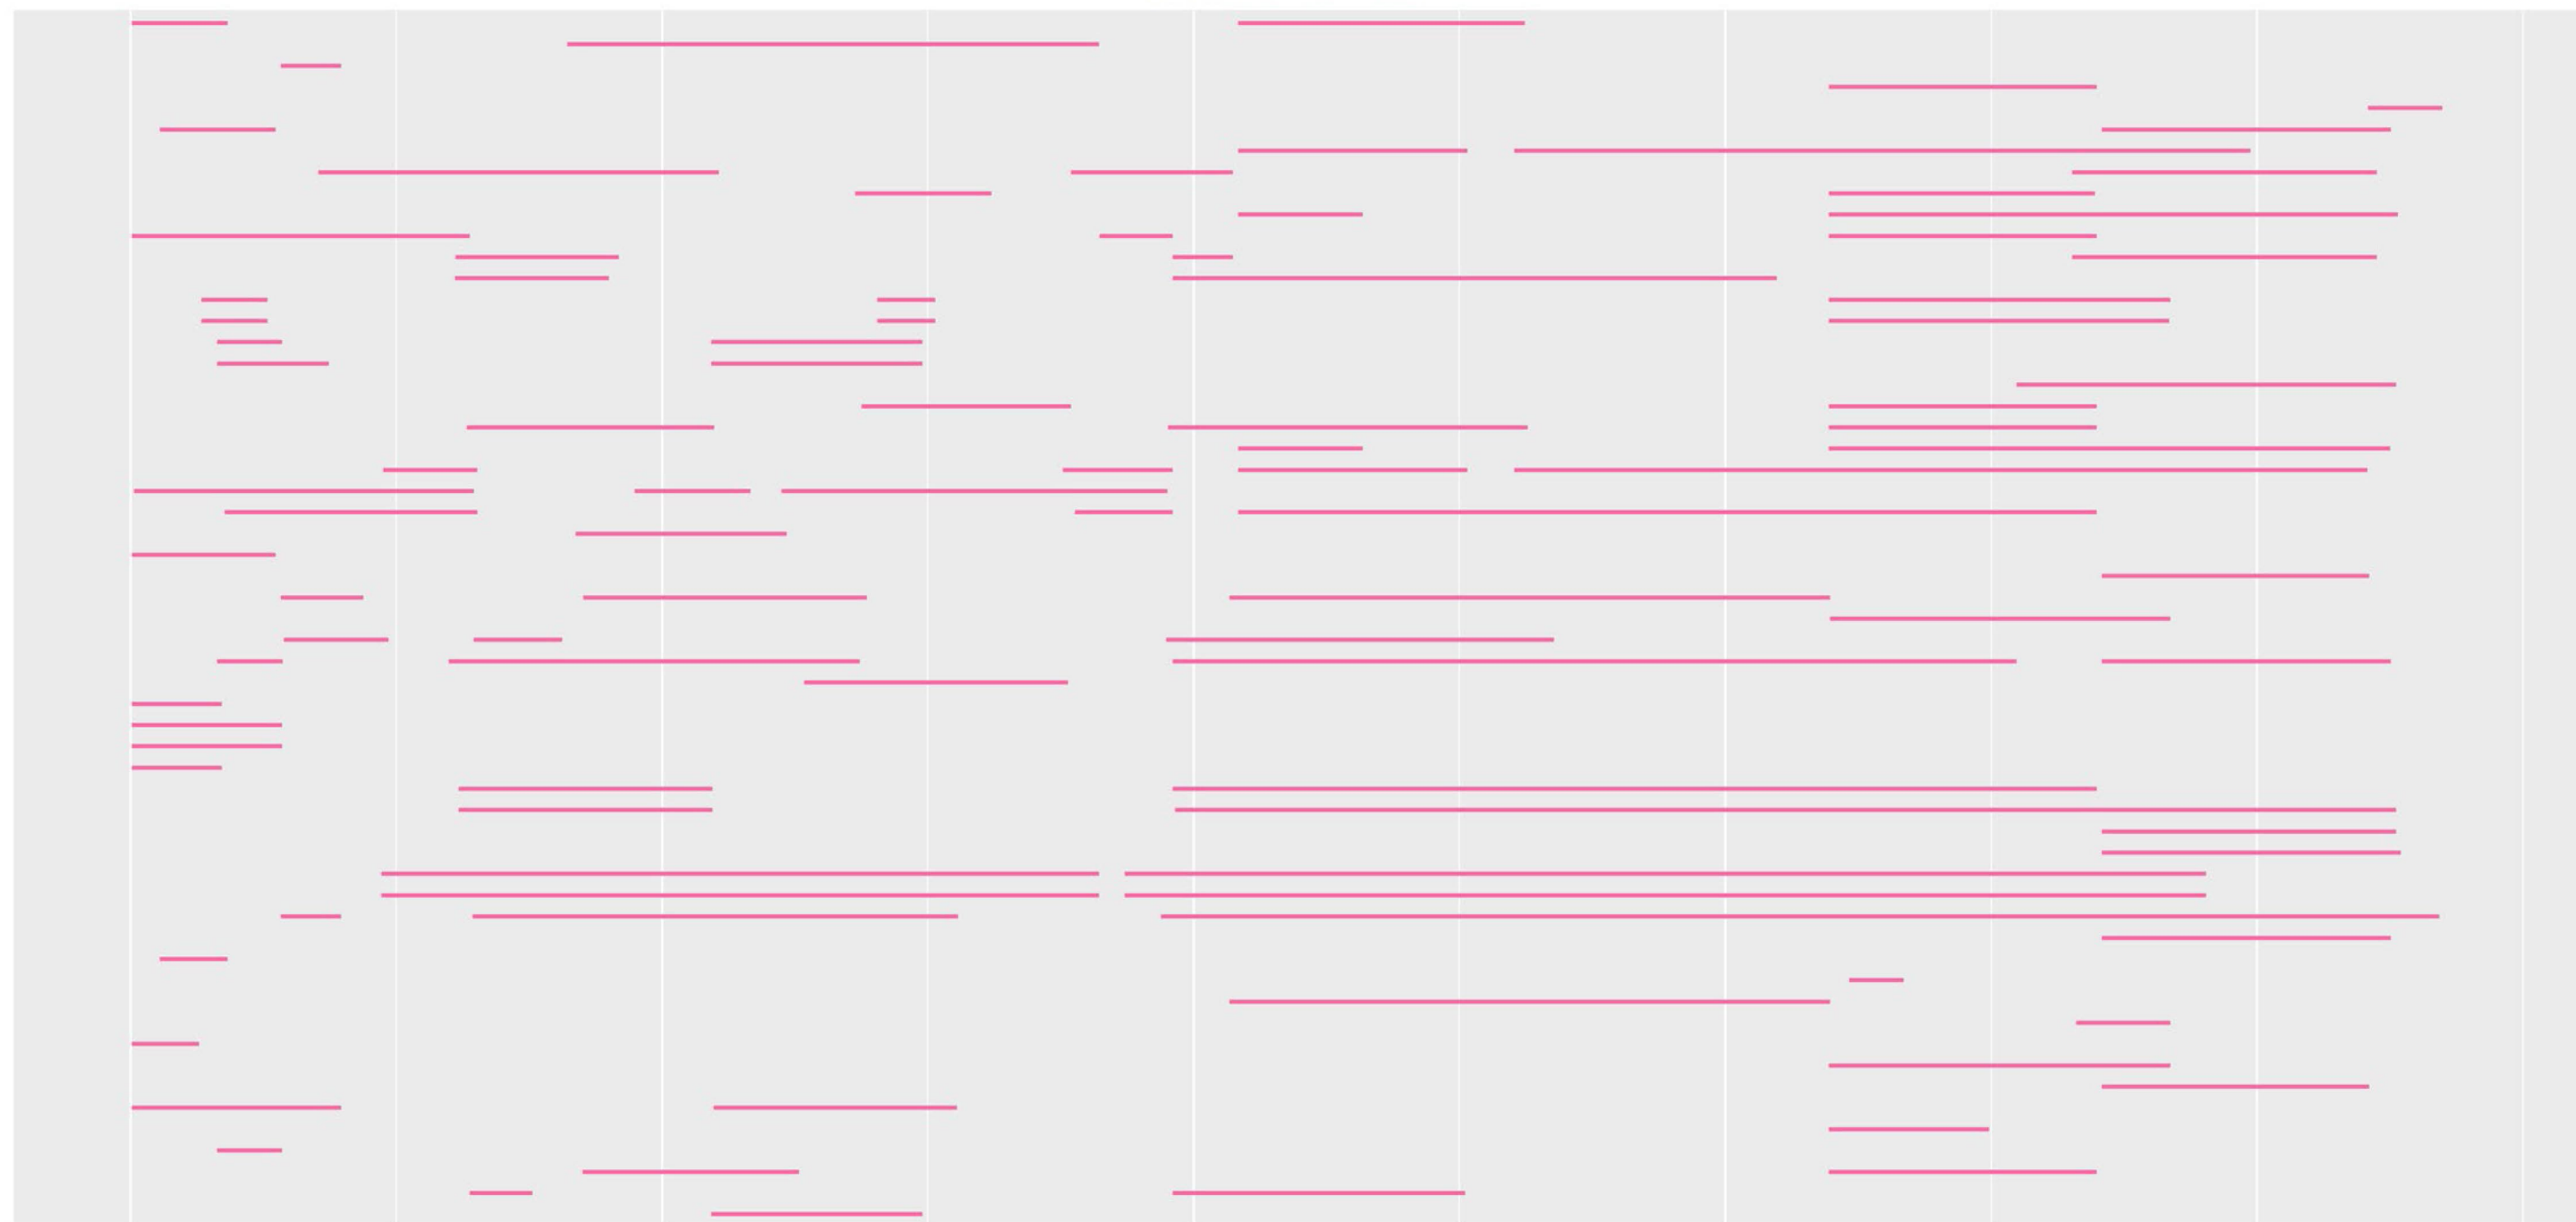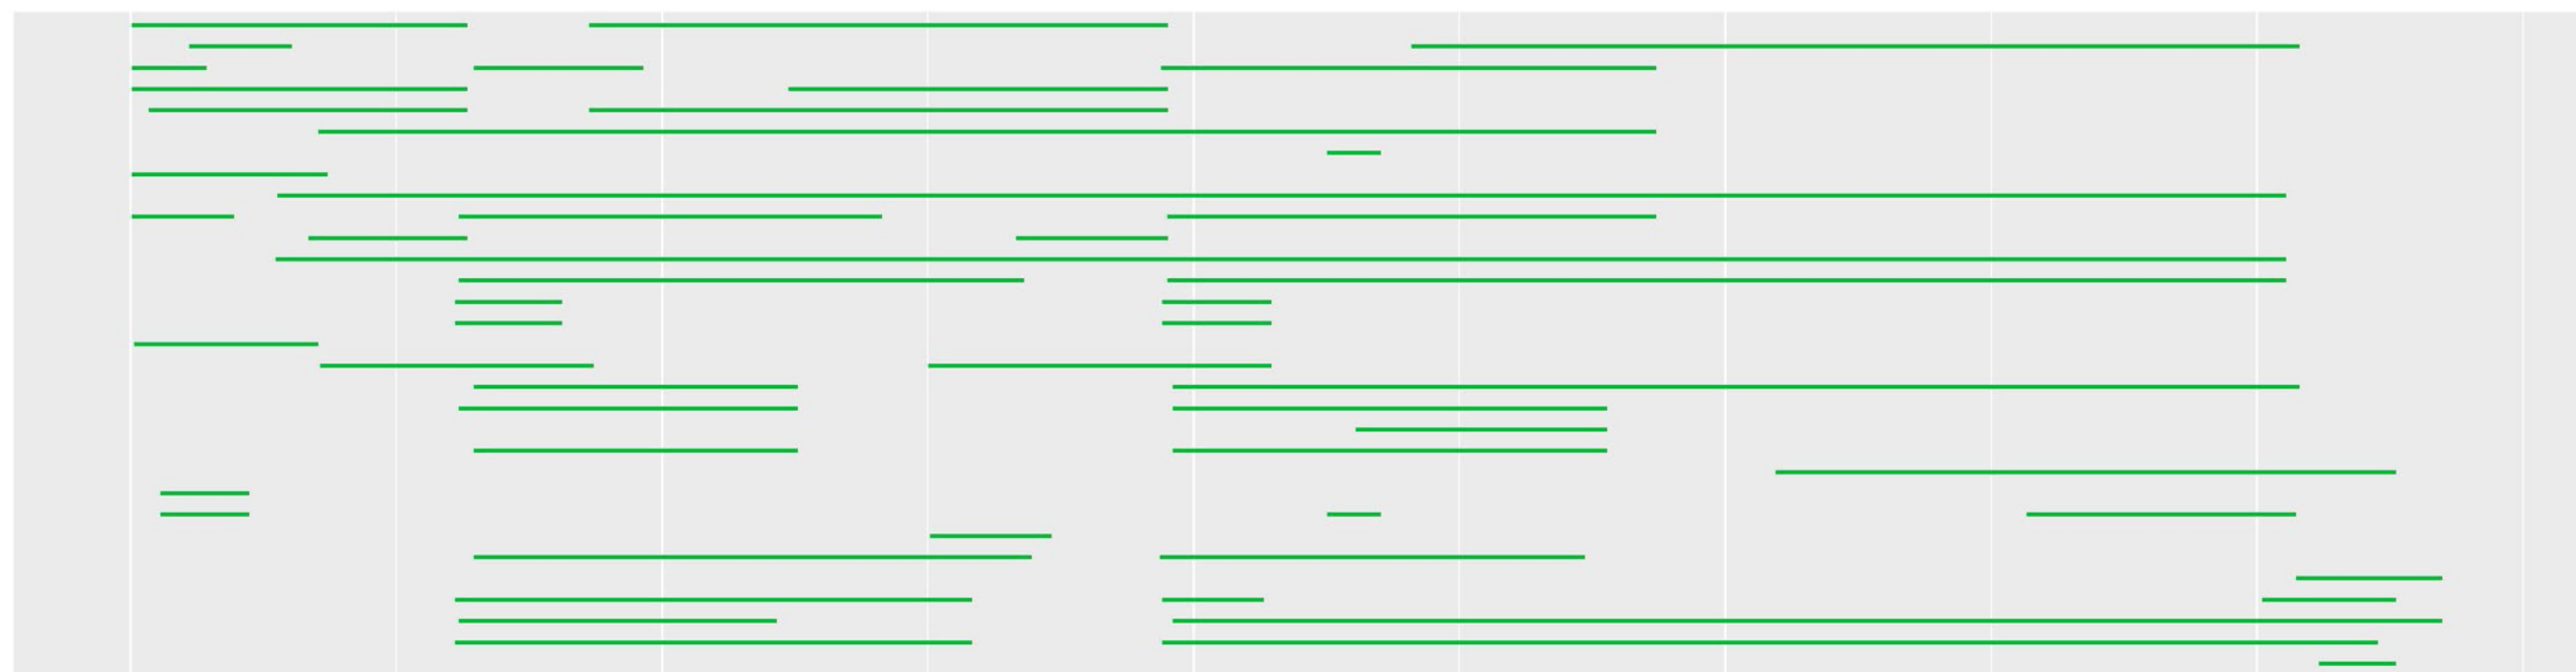

0

10

20

30

40

Chromosome length (Mb)

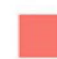

POP A

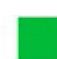

POP B

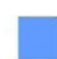

POP C

Chromosome Okis27

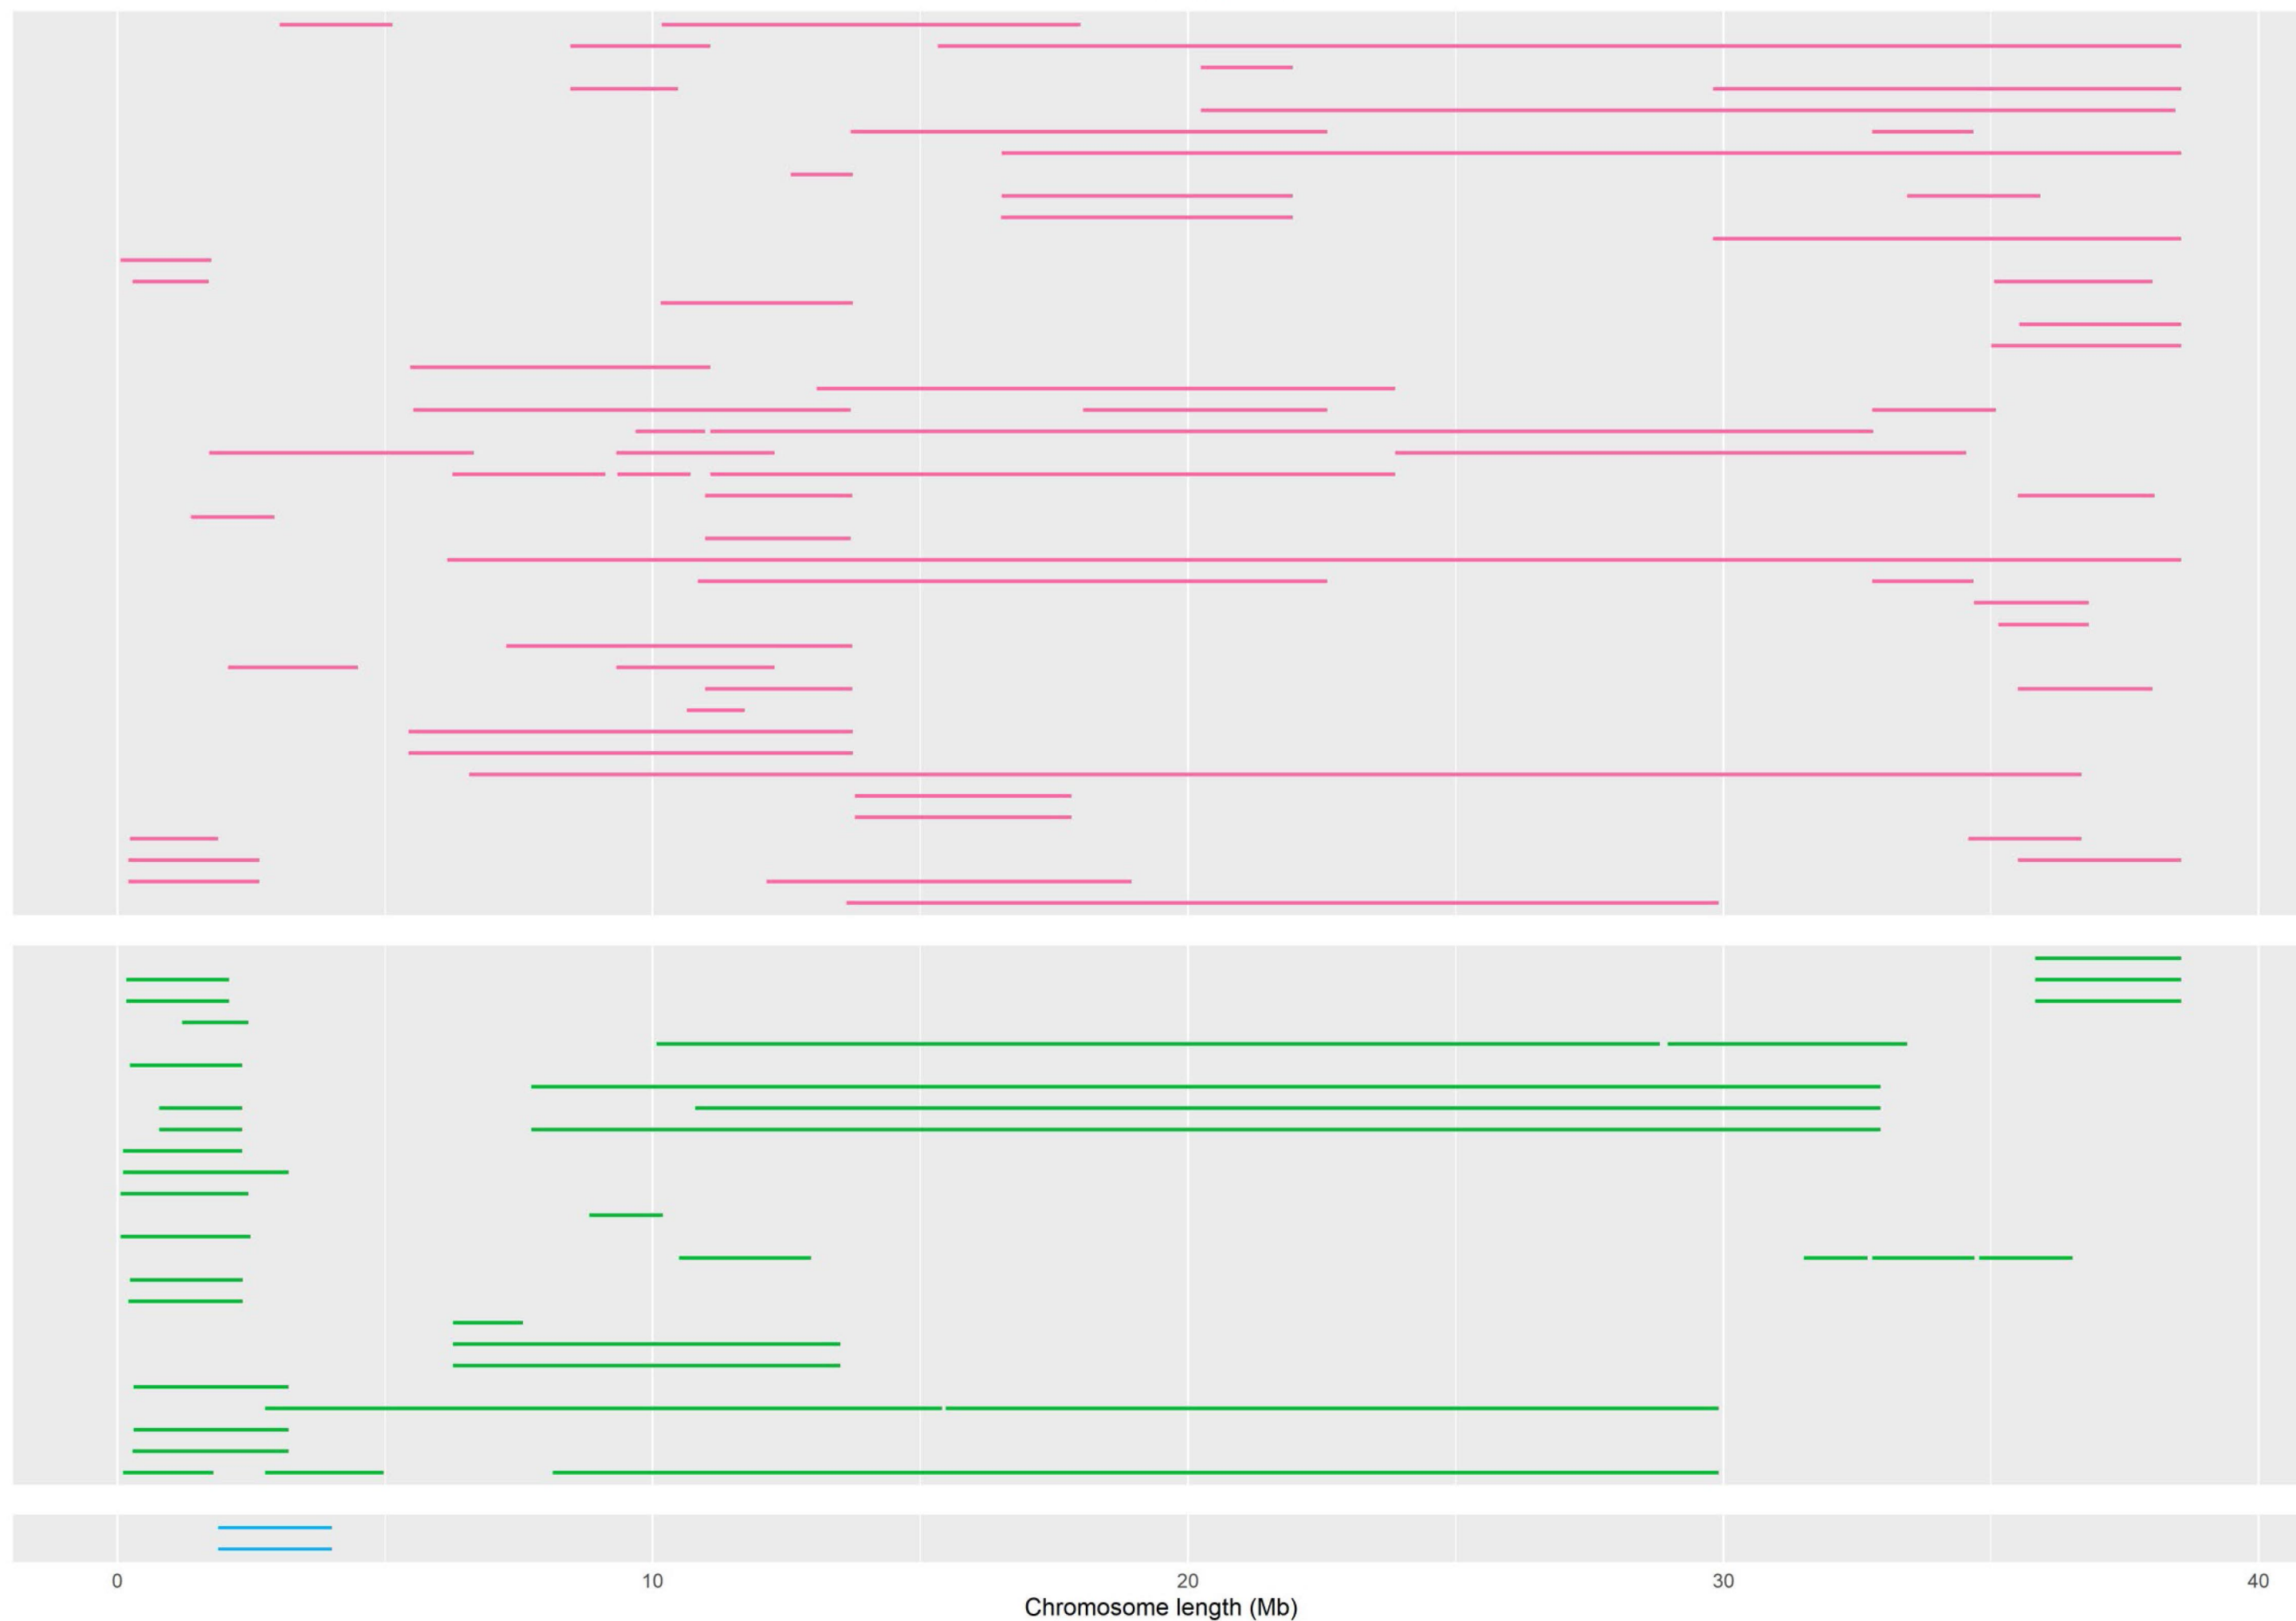

POP A POP B POP C

Chromosome Okis28

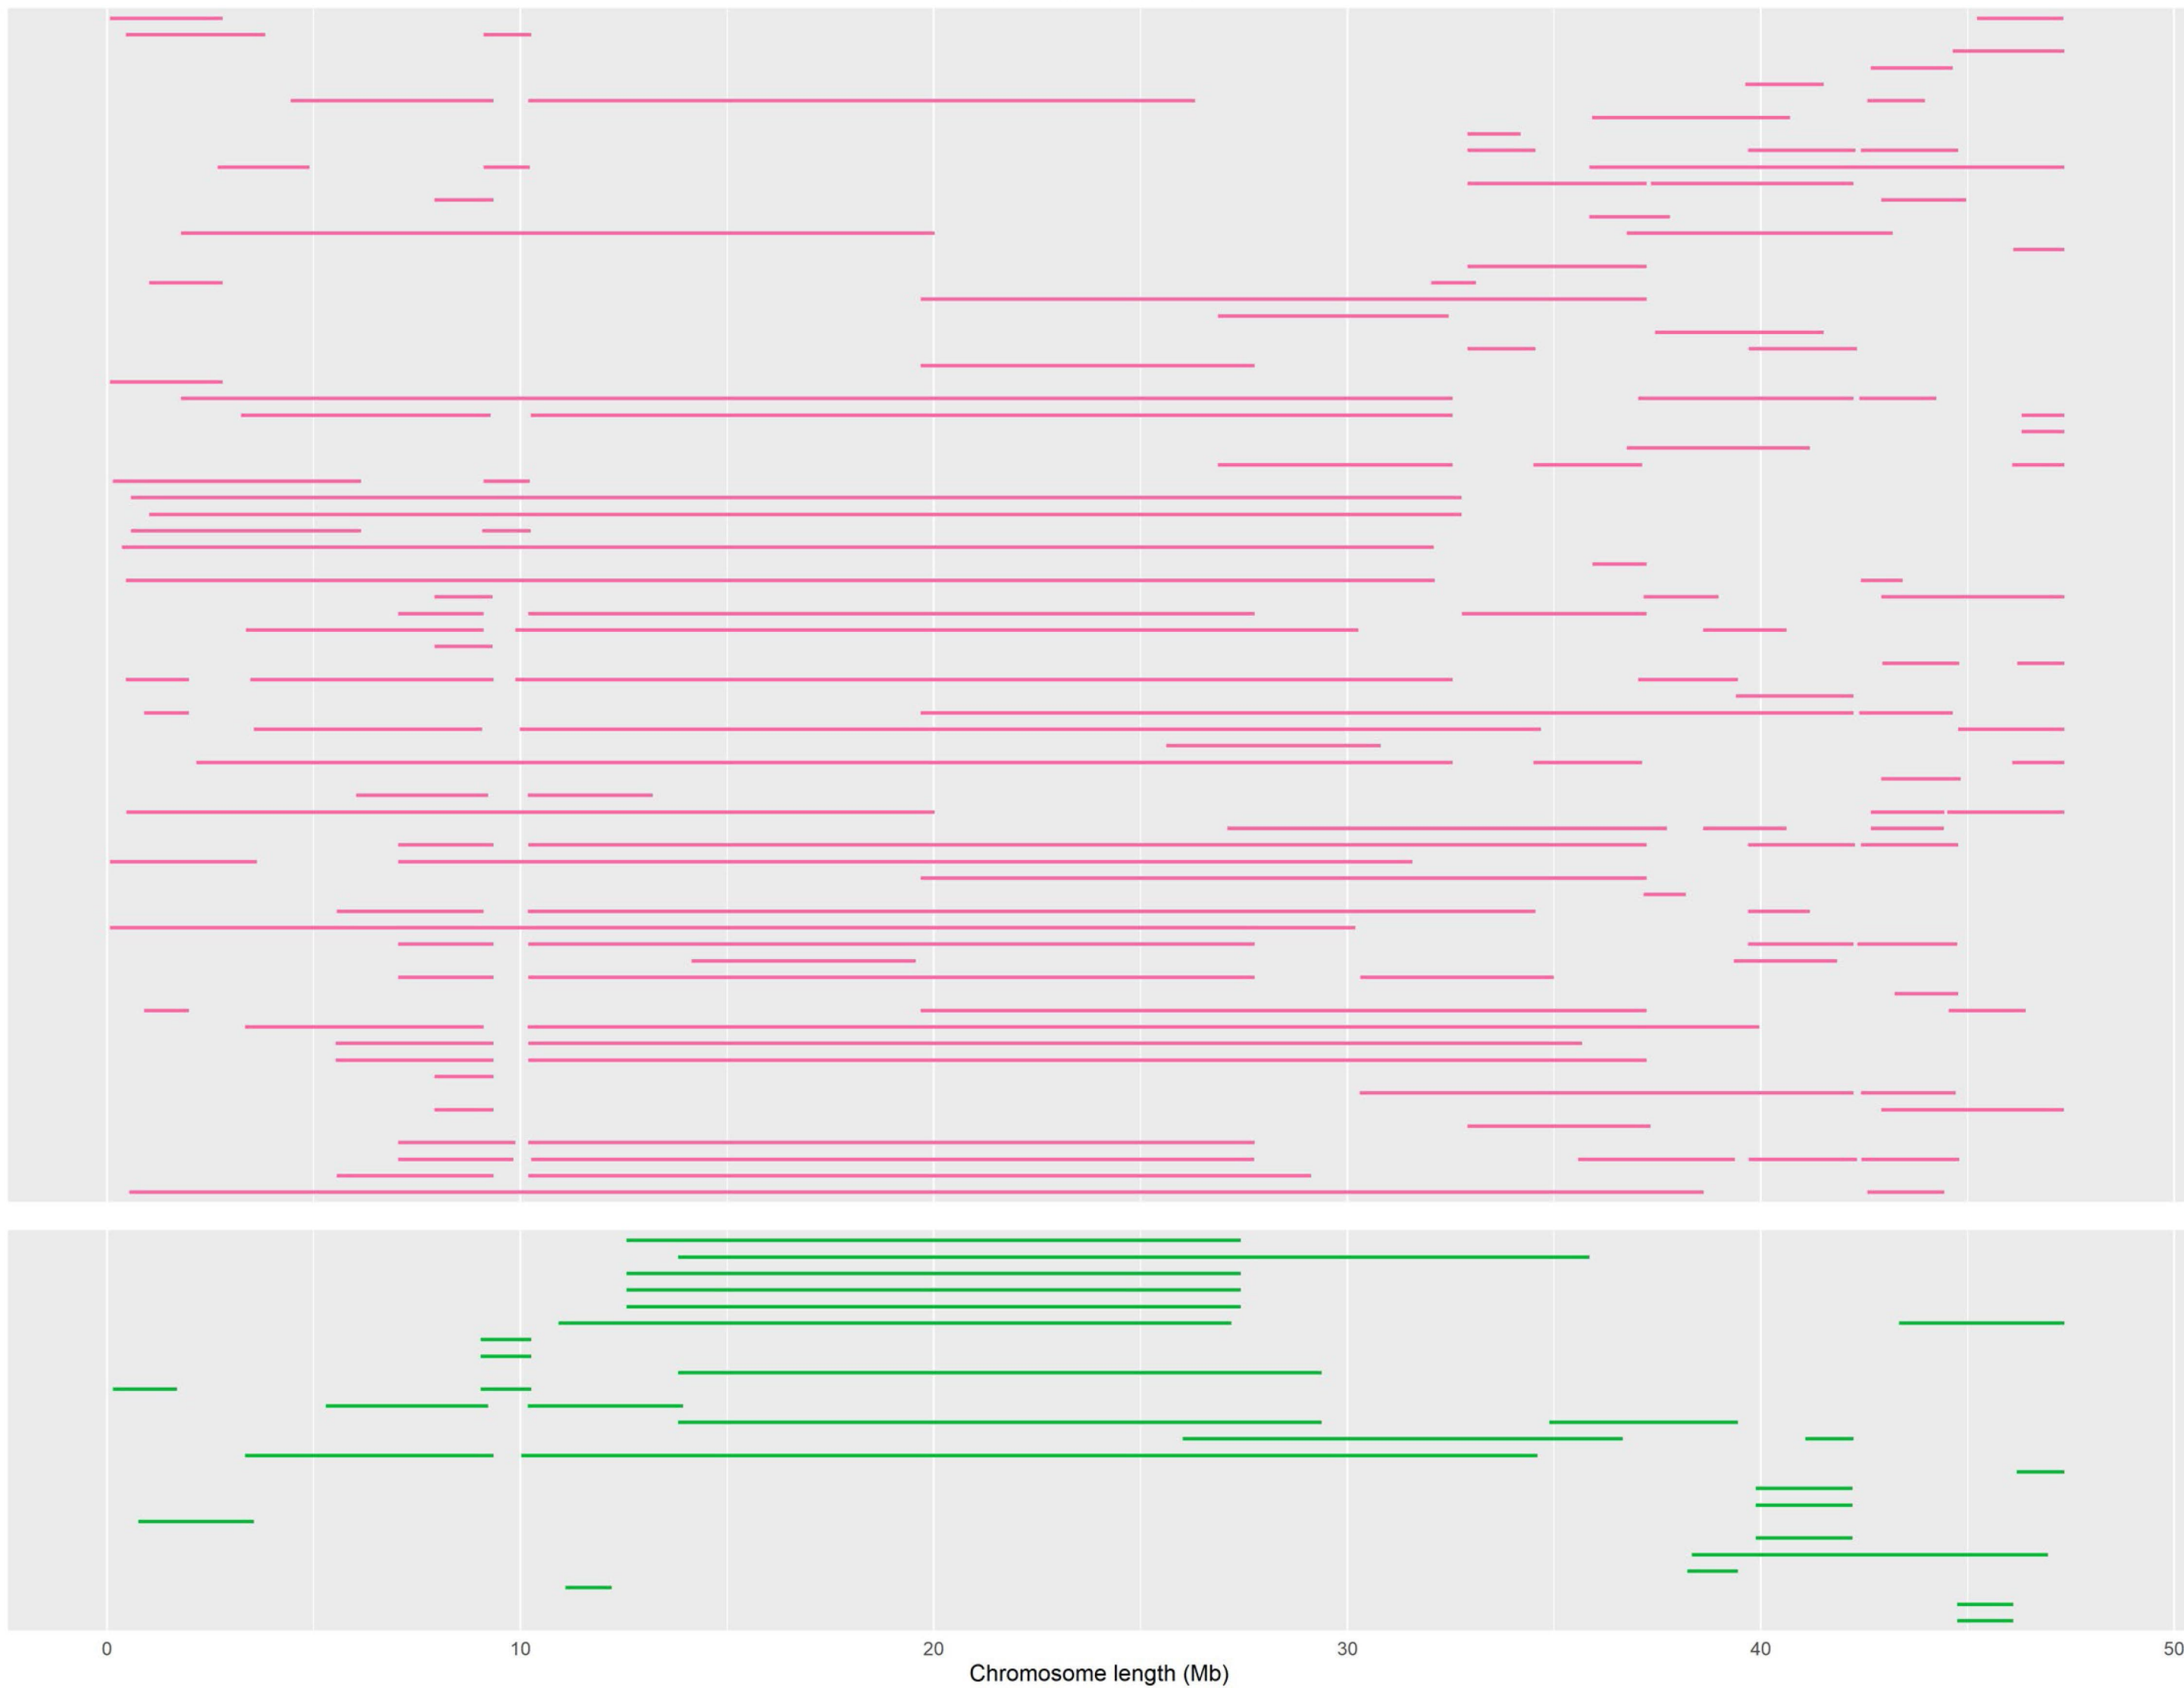



Chromosome Okis29

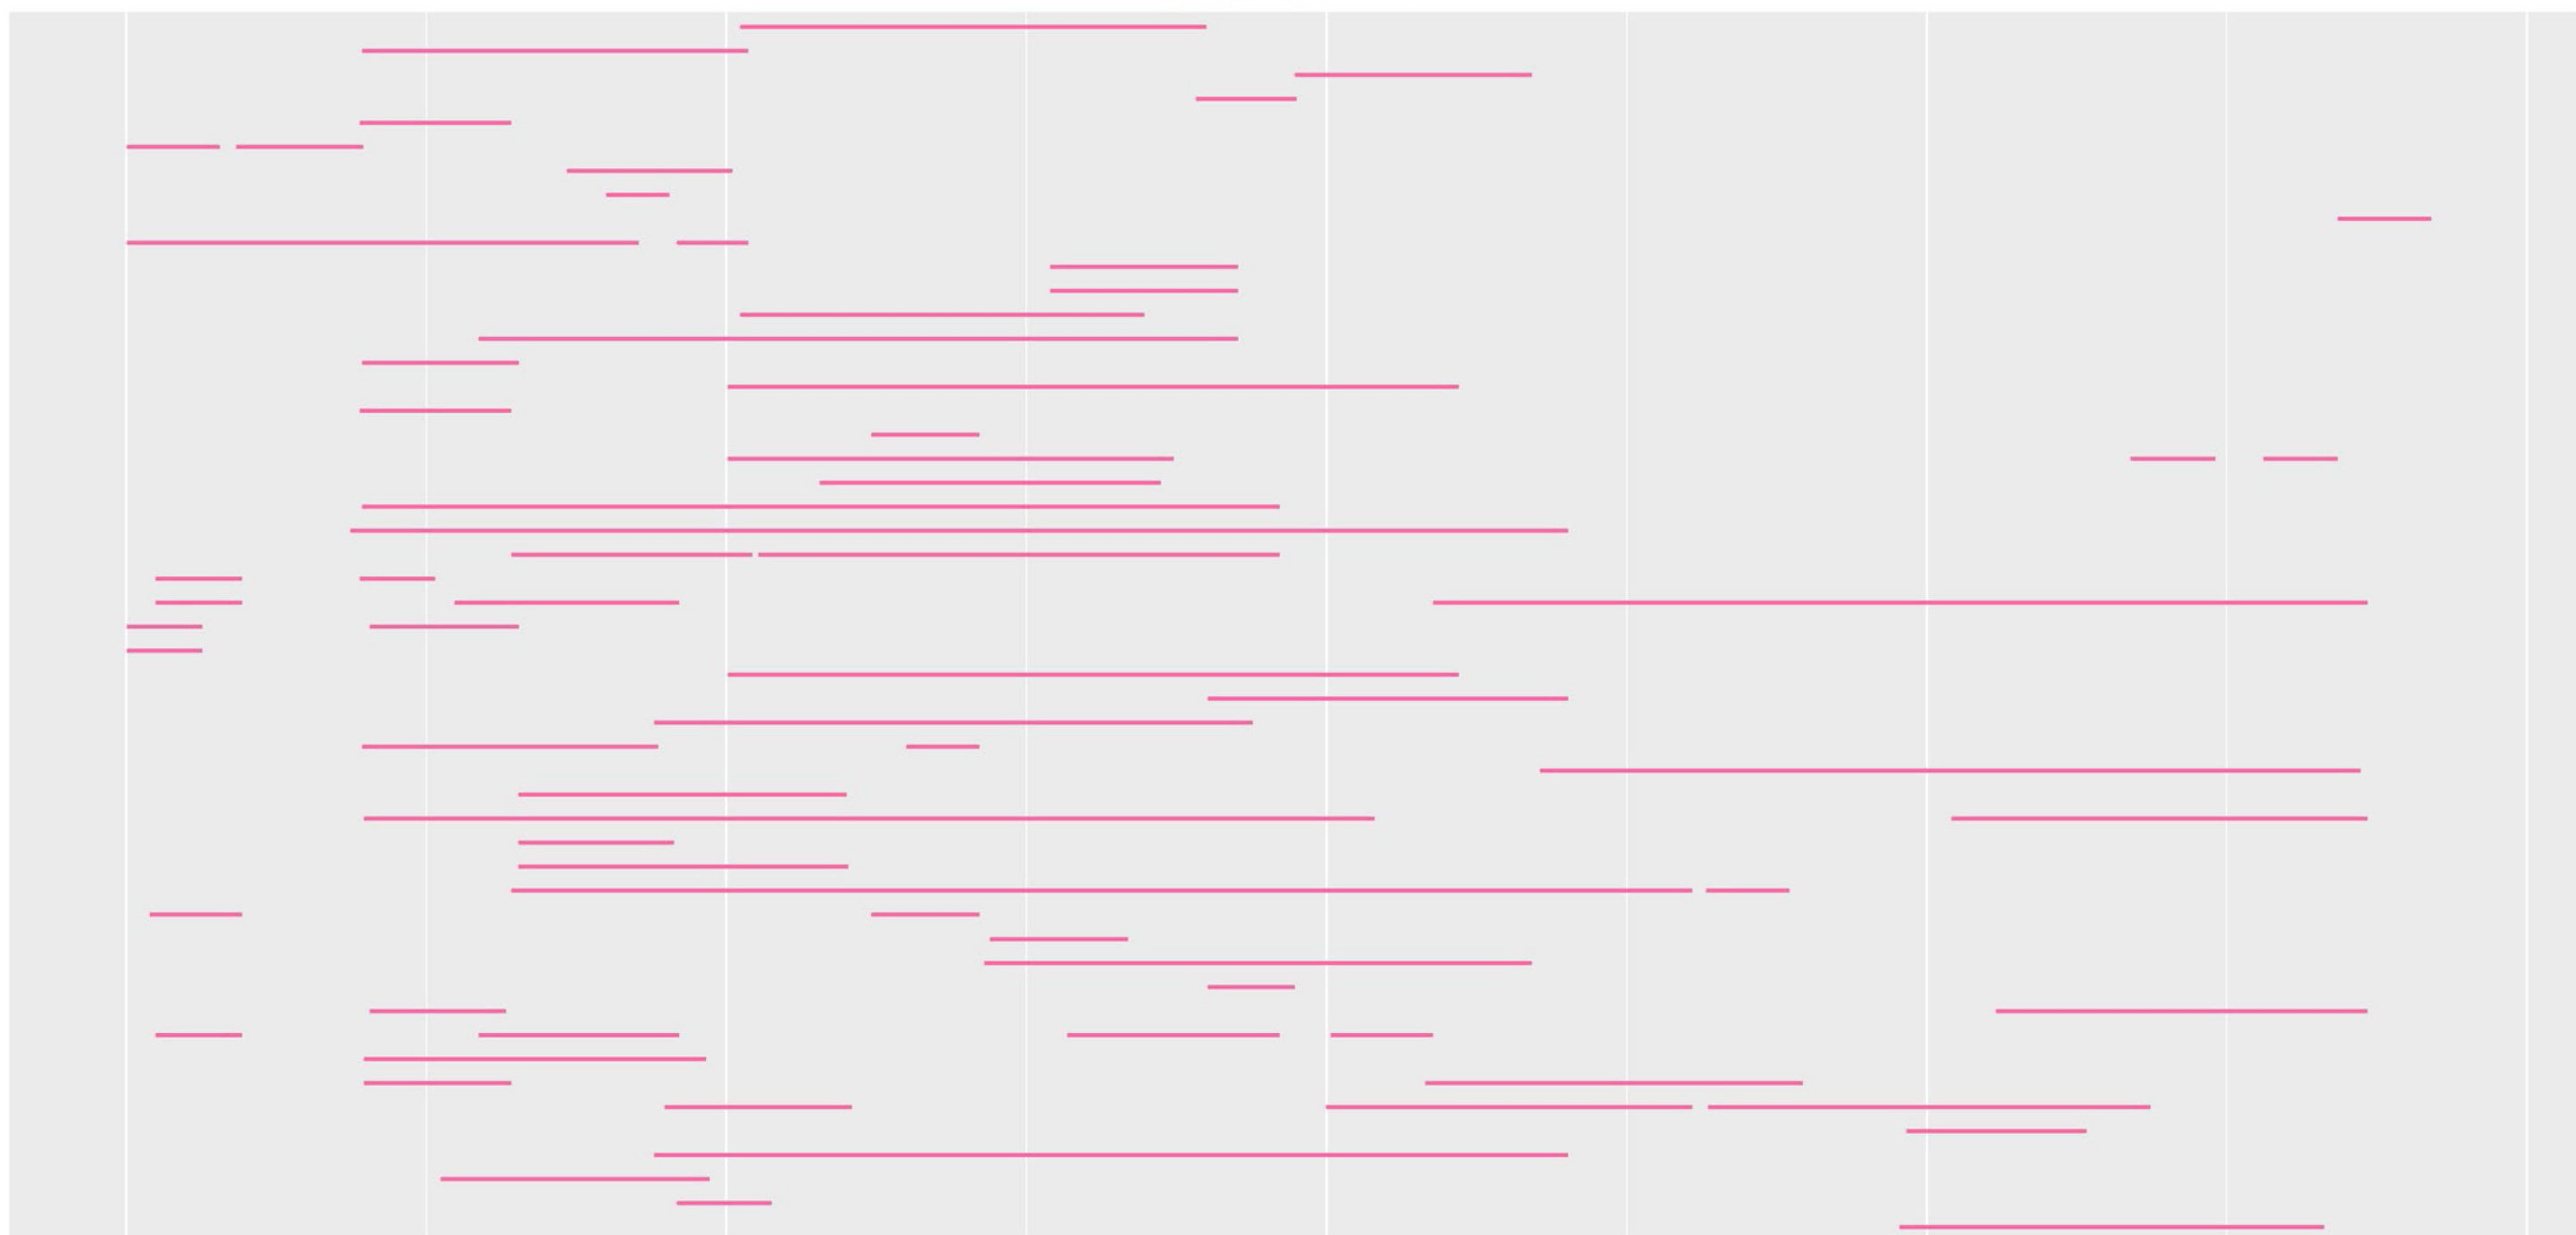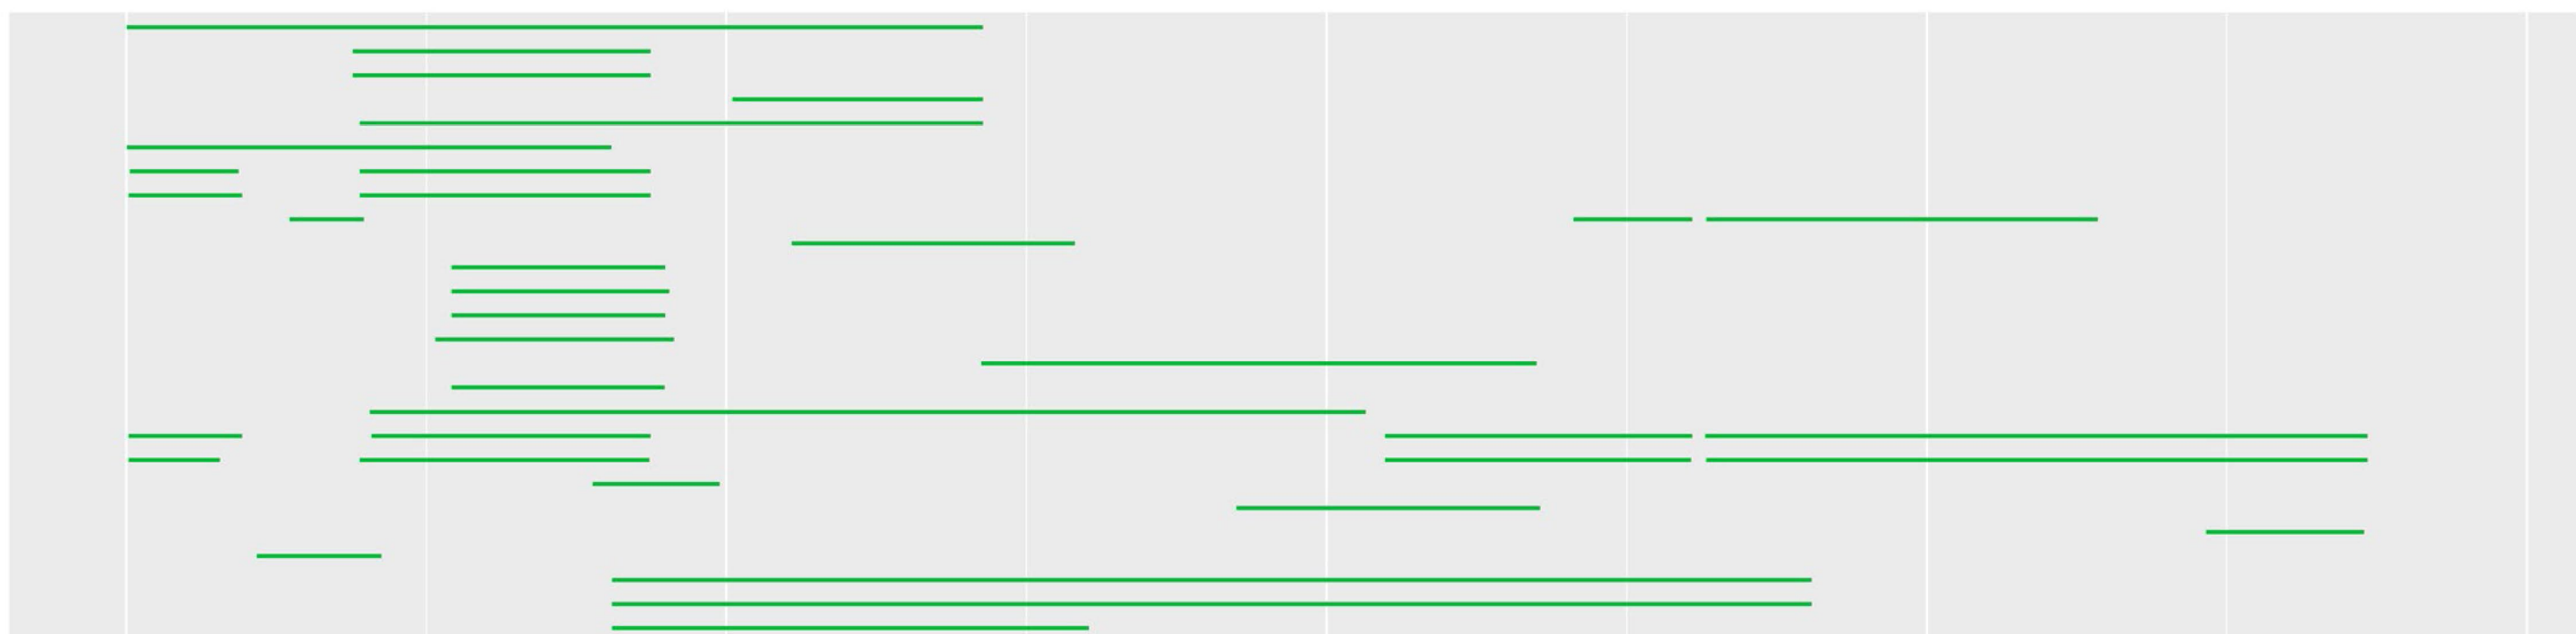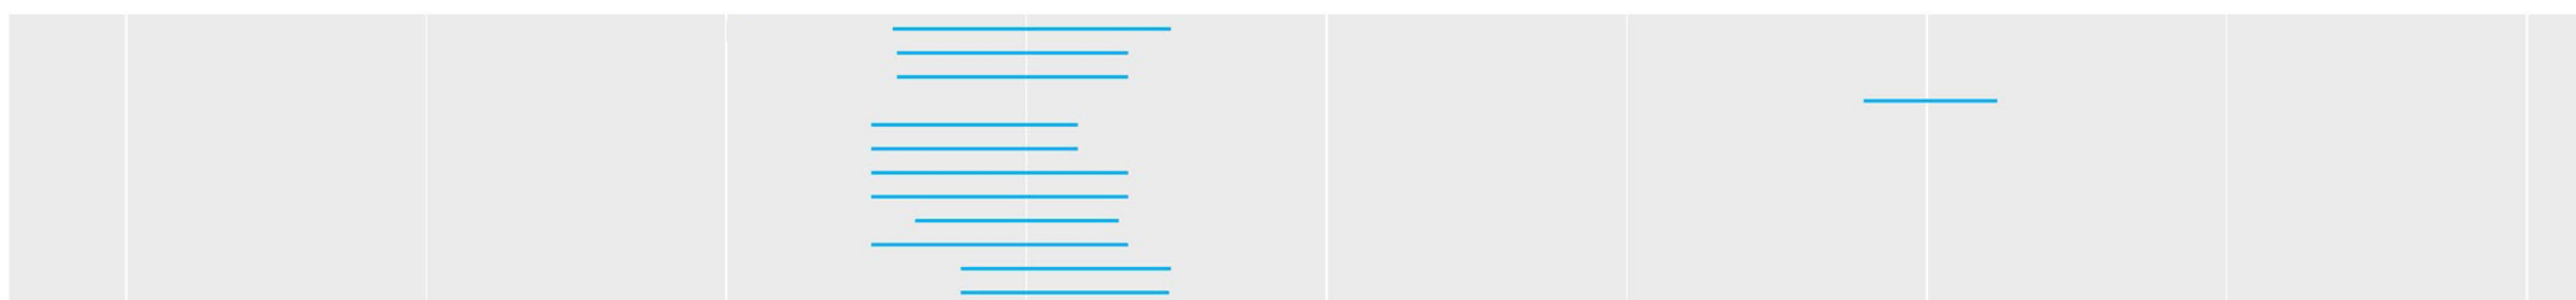

0

10

20

30

40

Chromosome length (Mb)

POP A POP B POP C

Chromosome Okis30

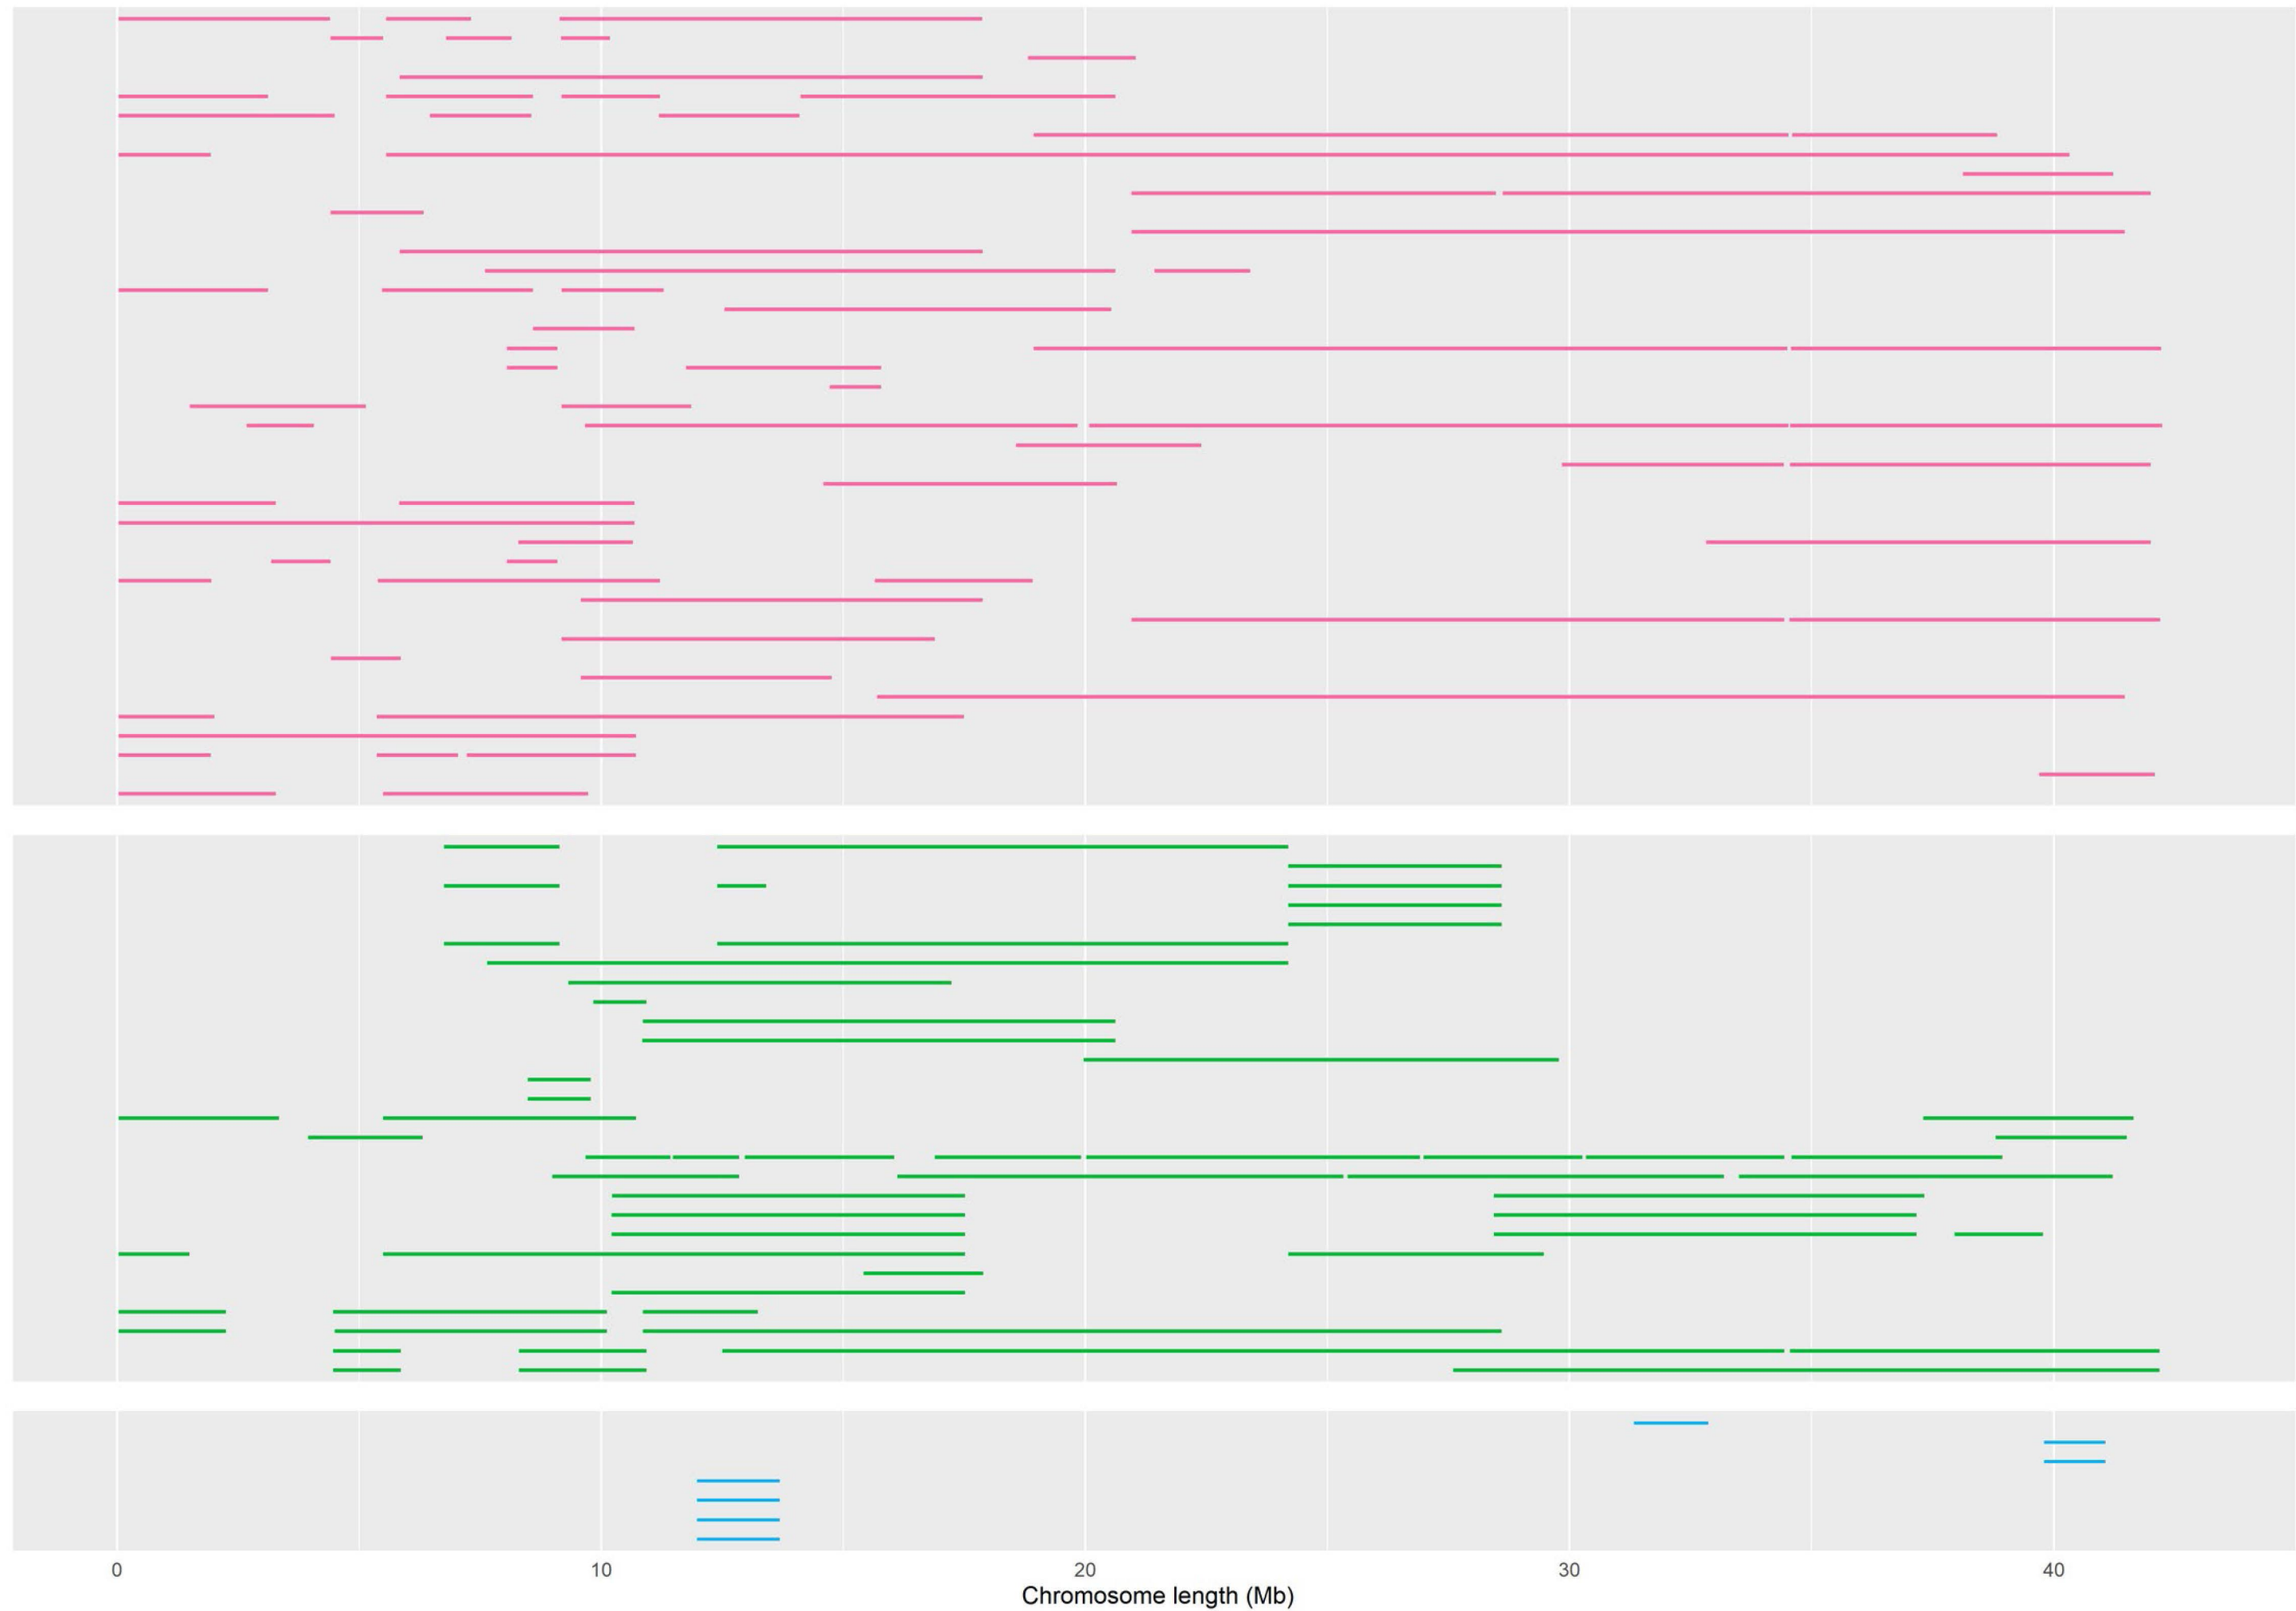

POP A POP B POP C
