# Supplementary figures and images for: Estimates of Autozygosity Through Runs of Homozygosity in Farmed Coho Salmon
Source: MDPI journal article supplement (doi:10.3390/genes11050490), 2020-04-30

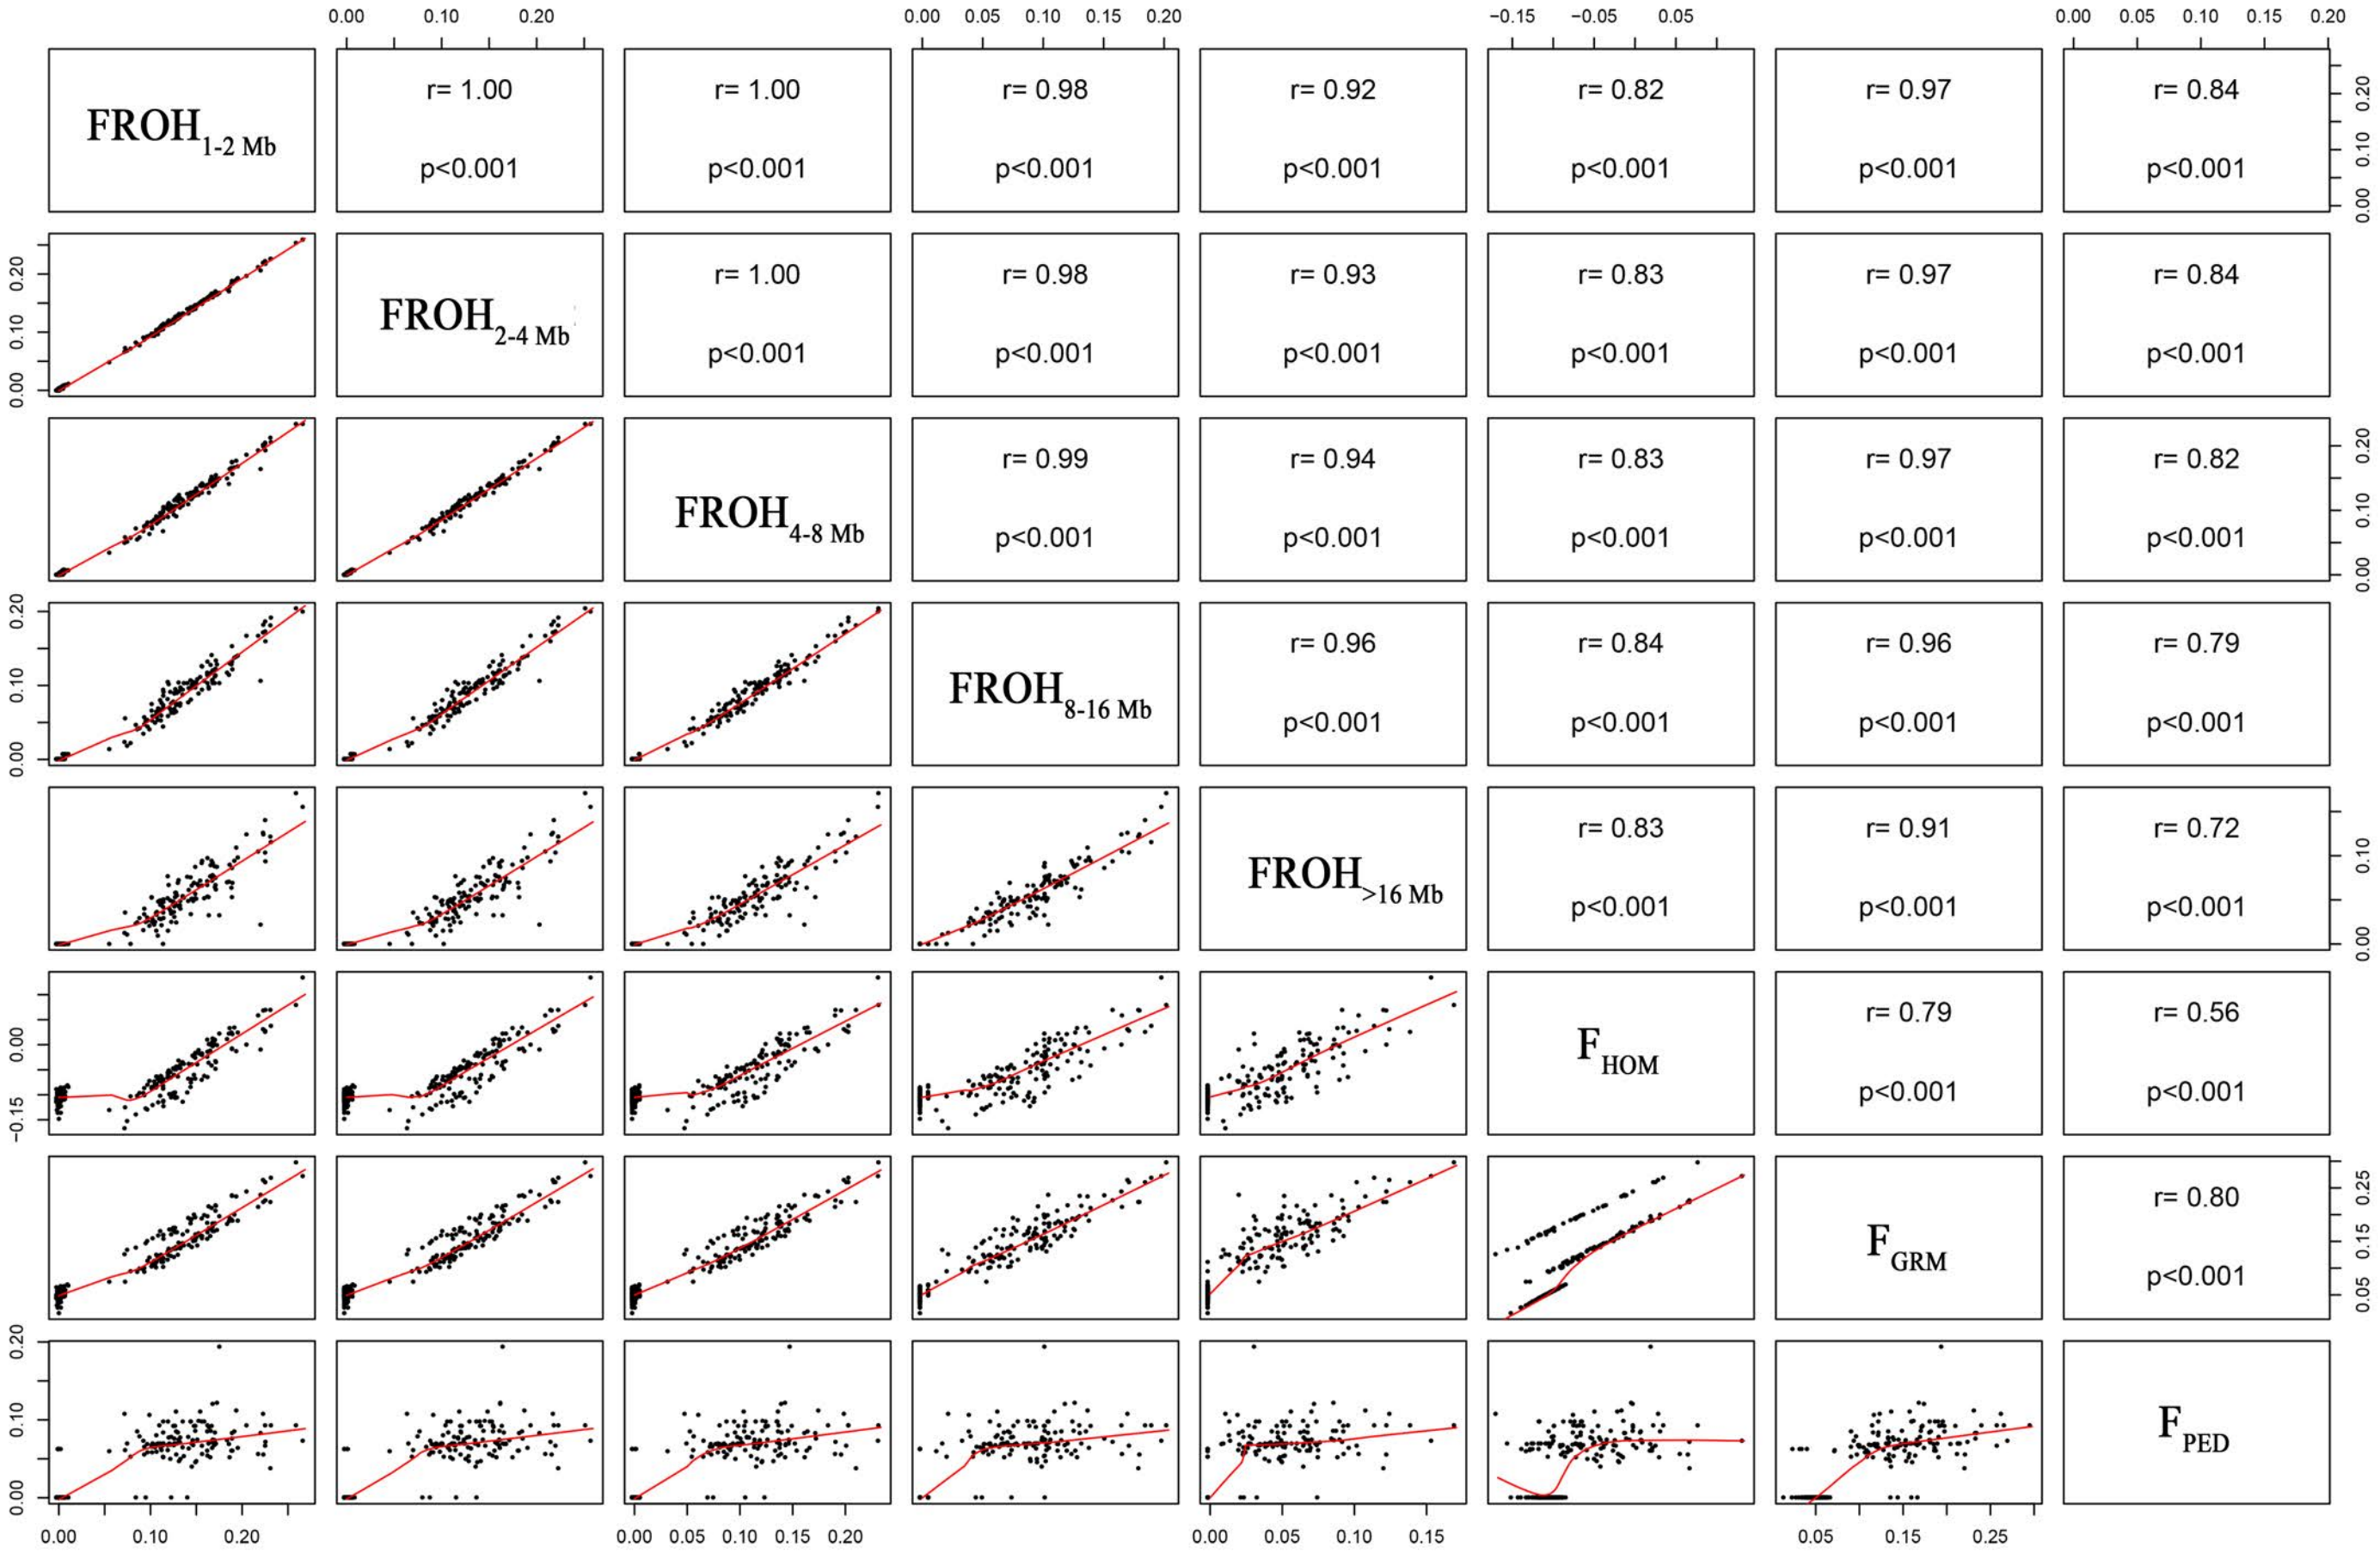

Supplement: s1 [file s1]

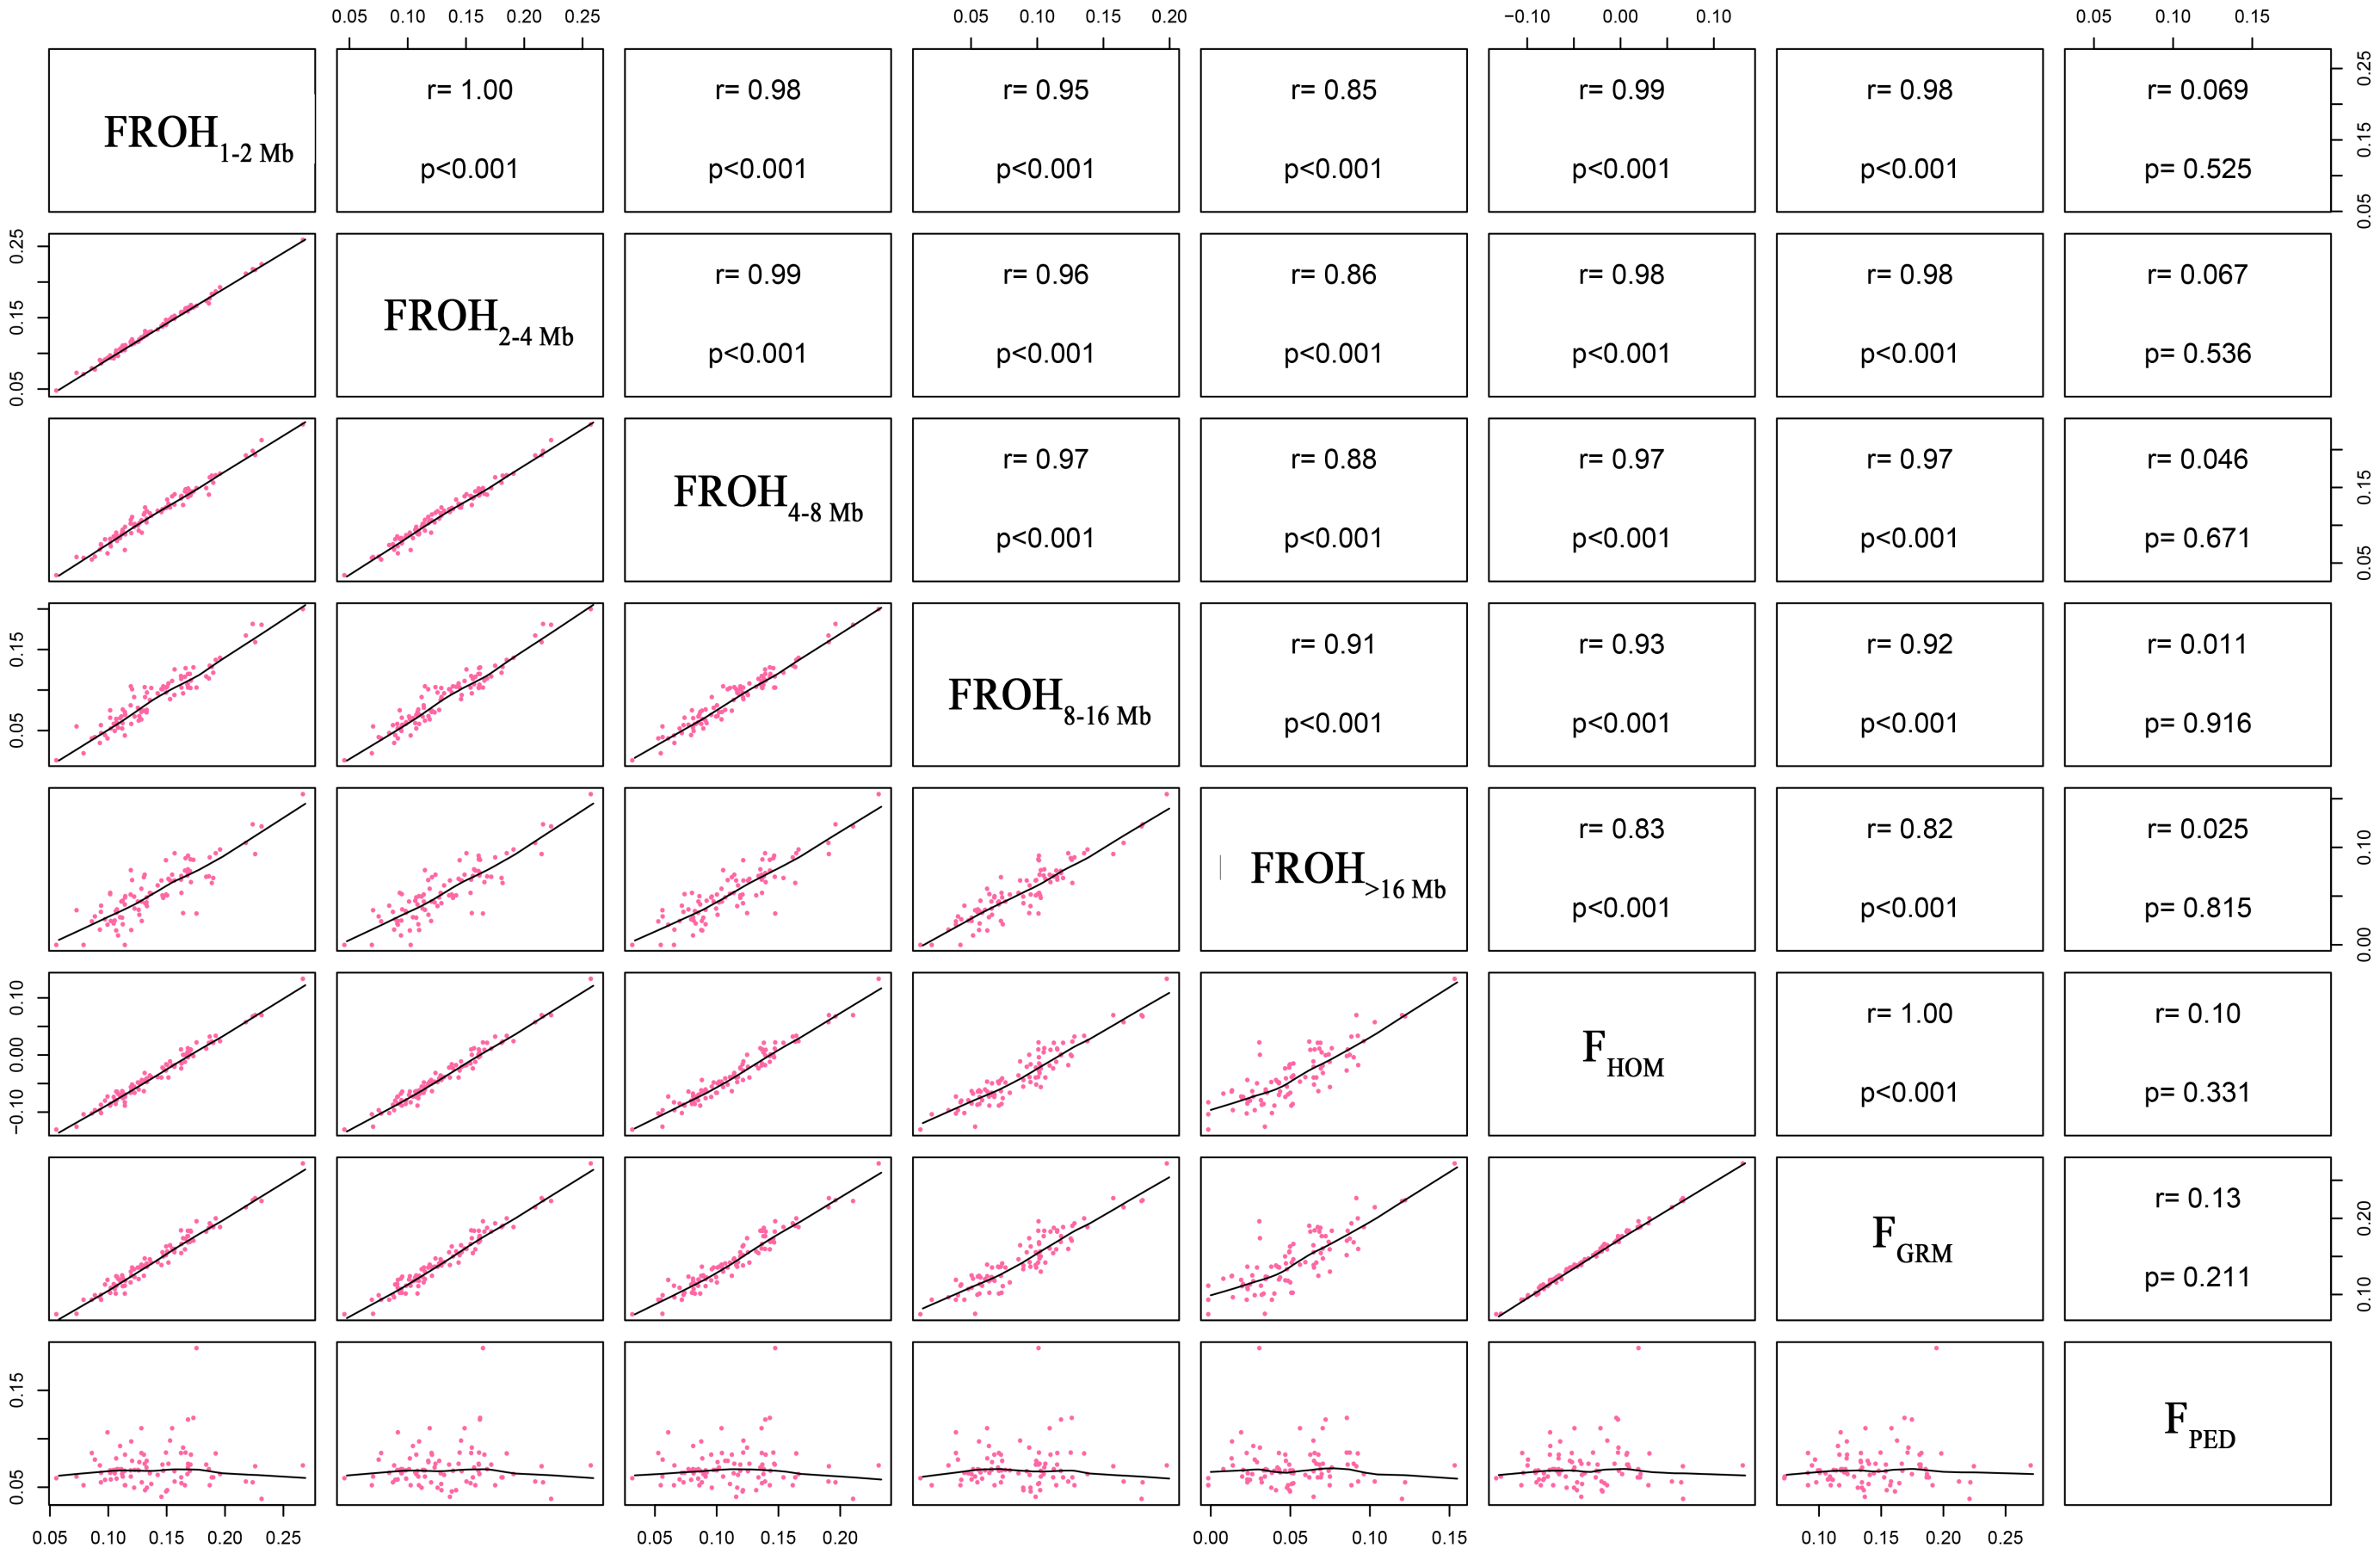

Supplement: s1 [file s1]

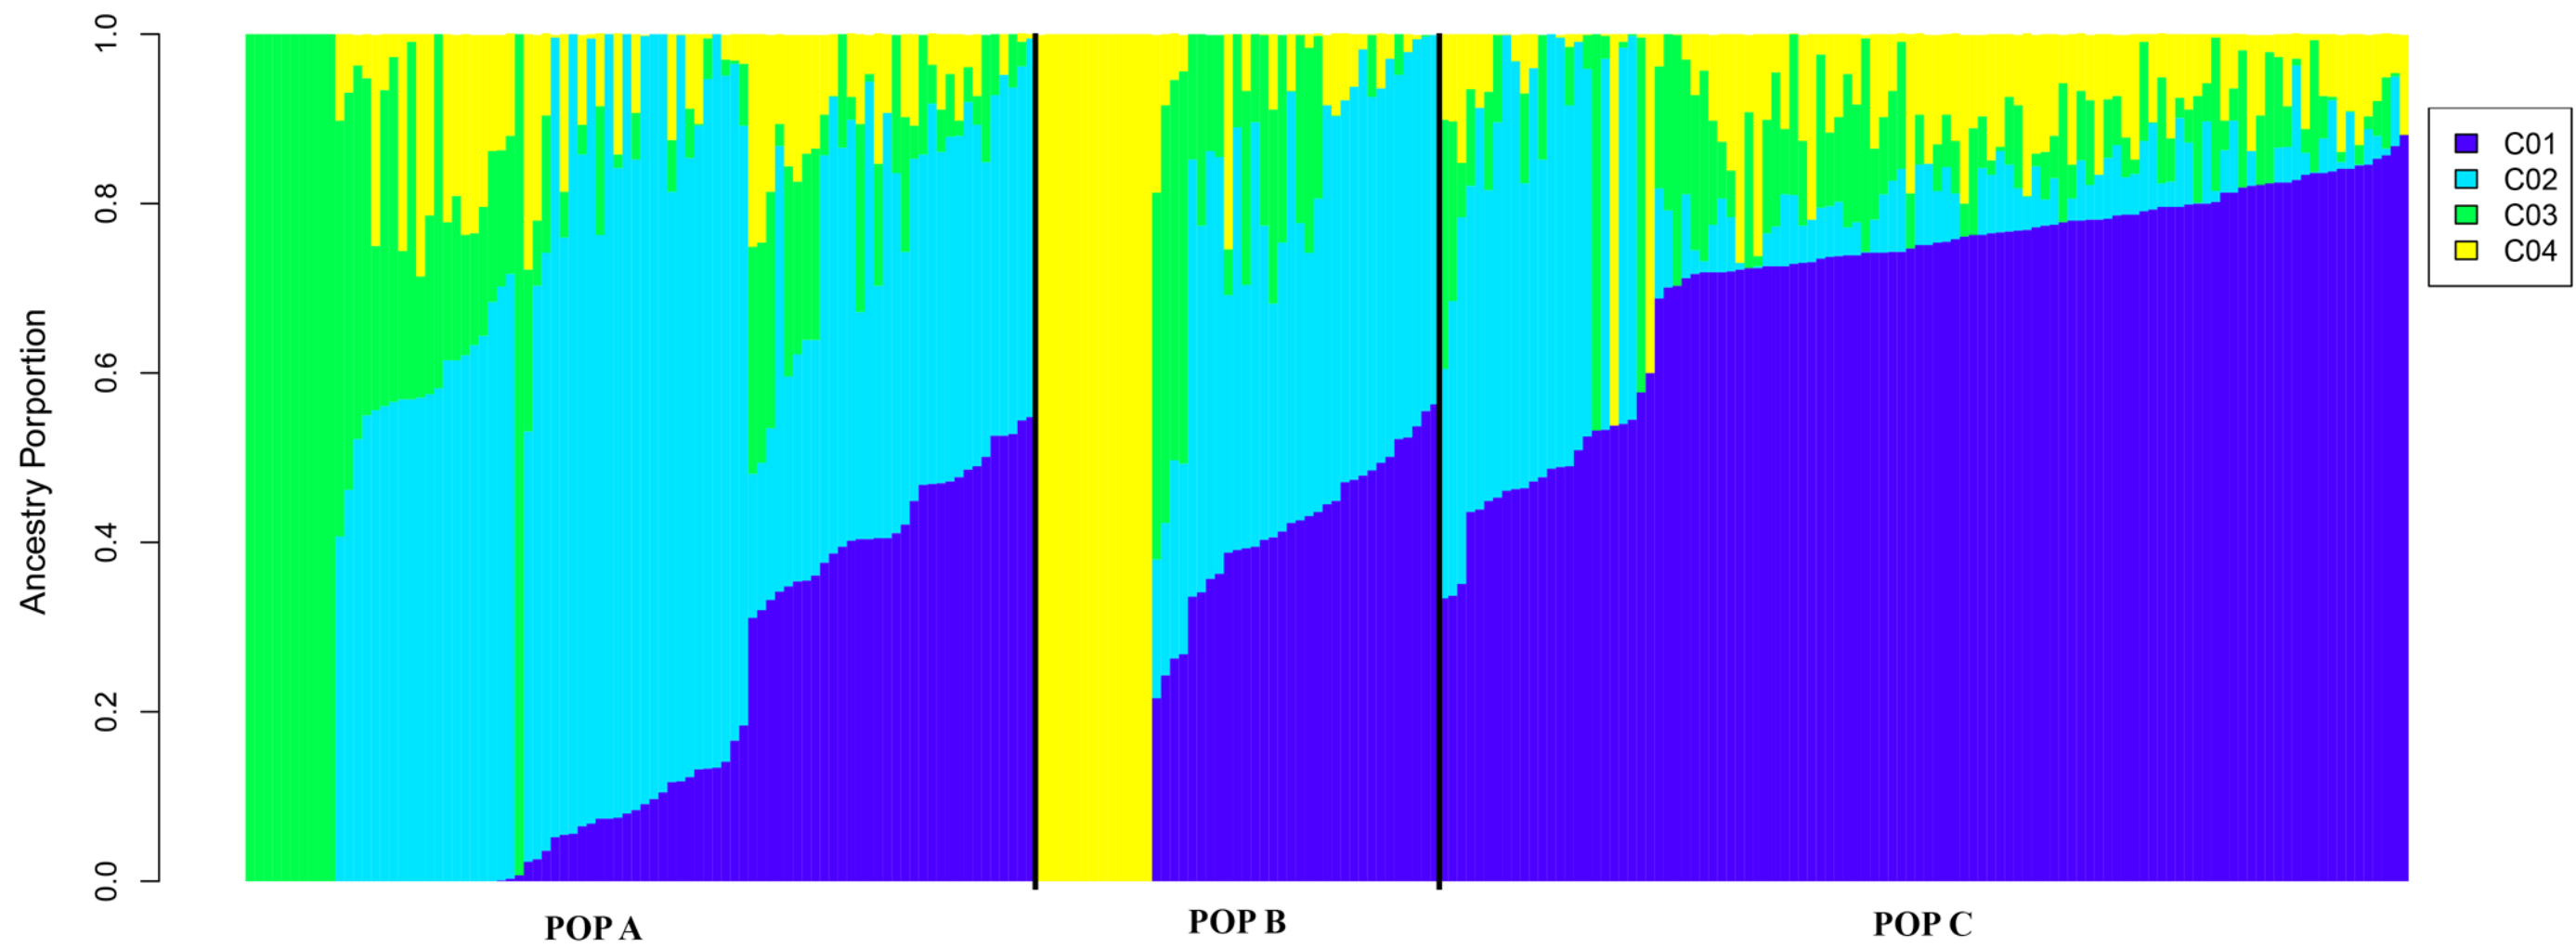

Supplement: s1 [file s1]

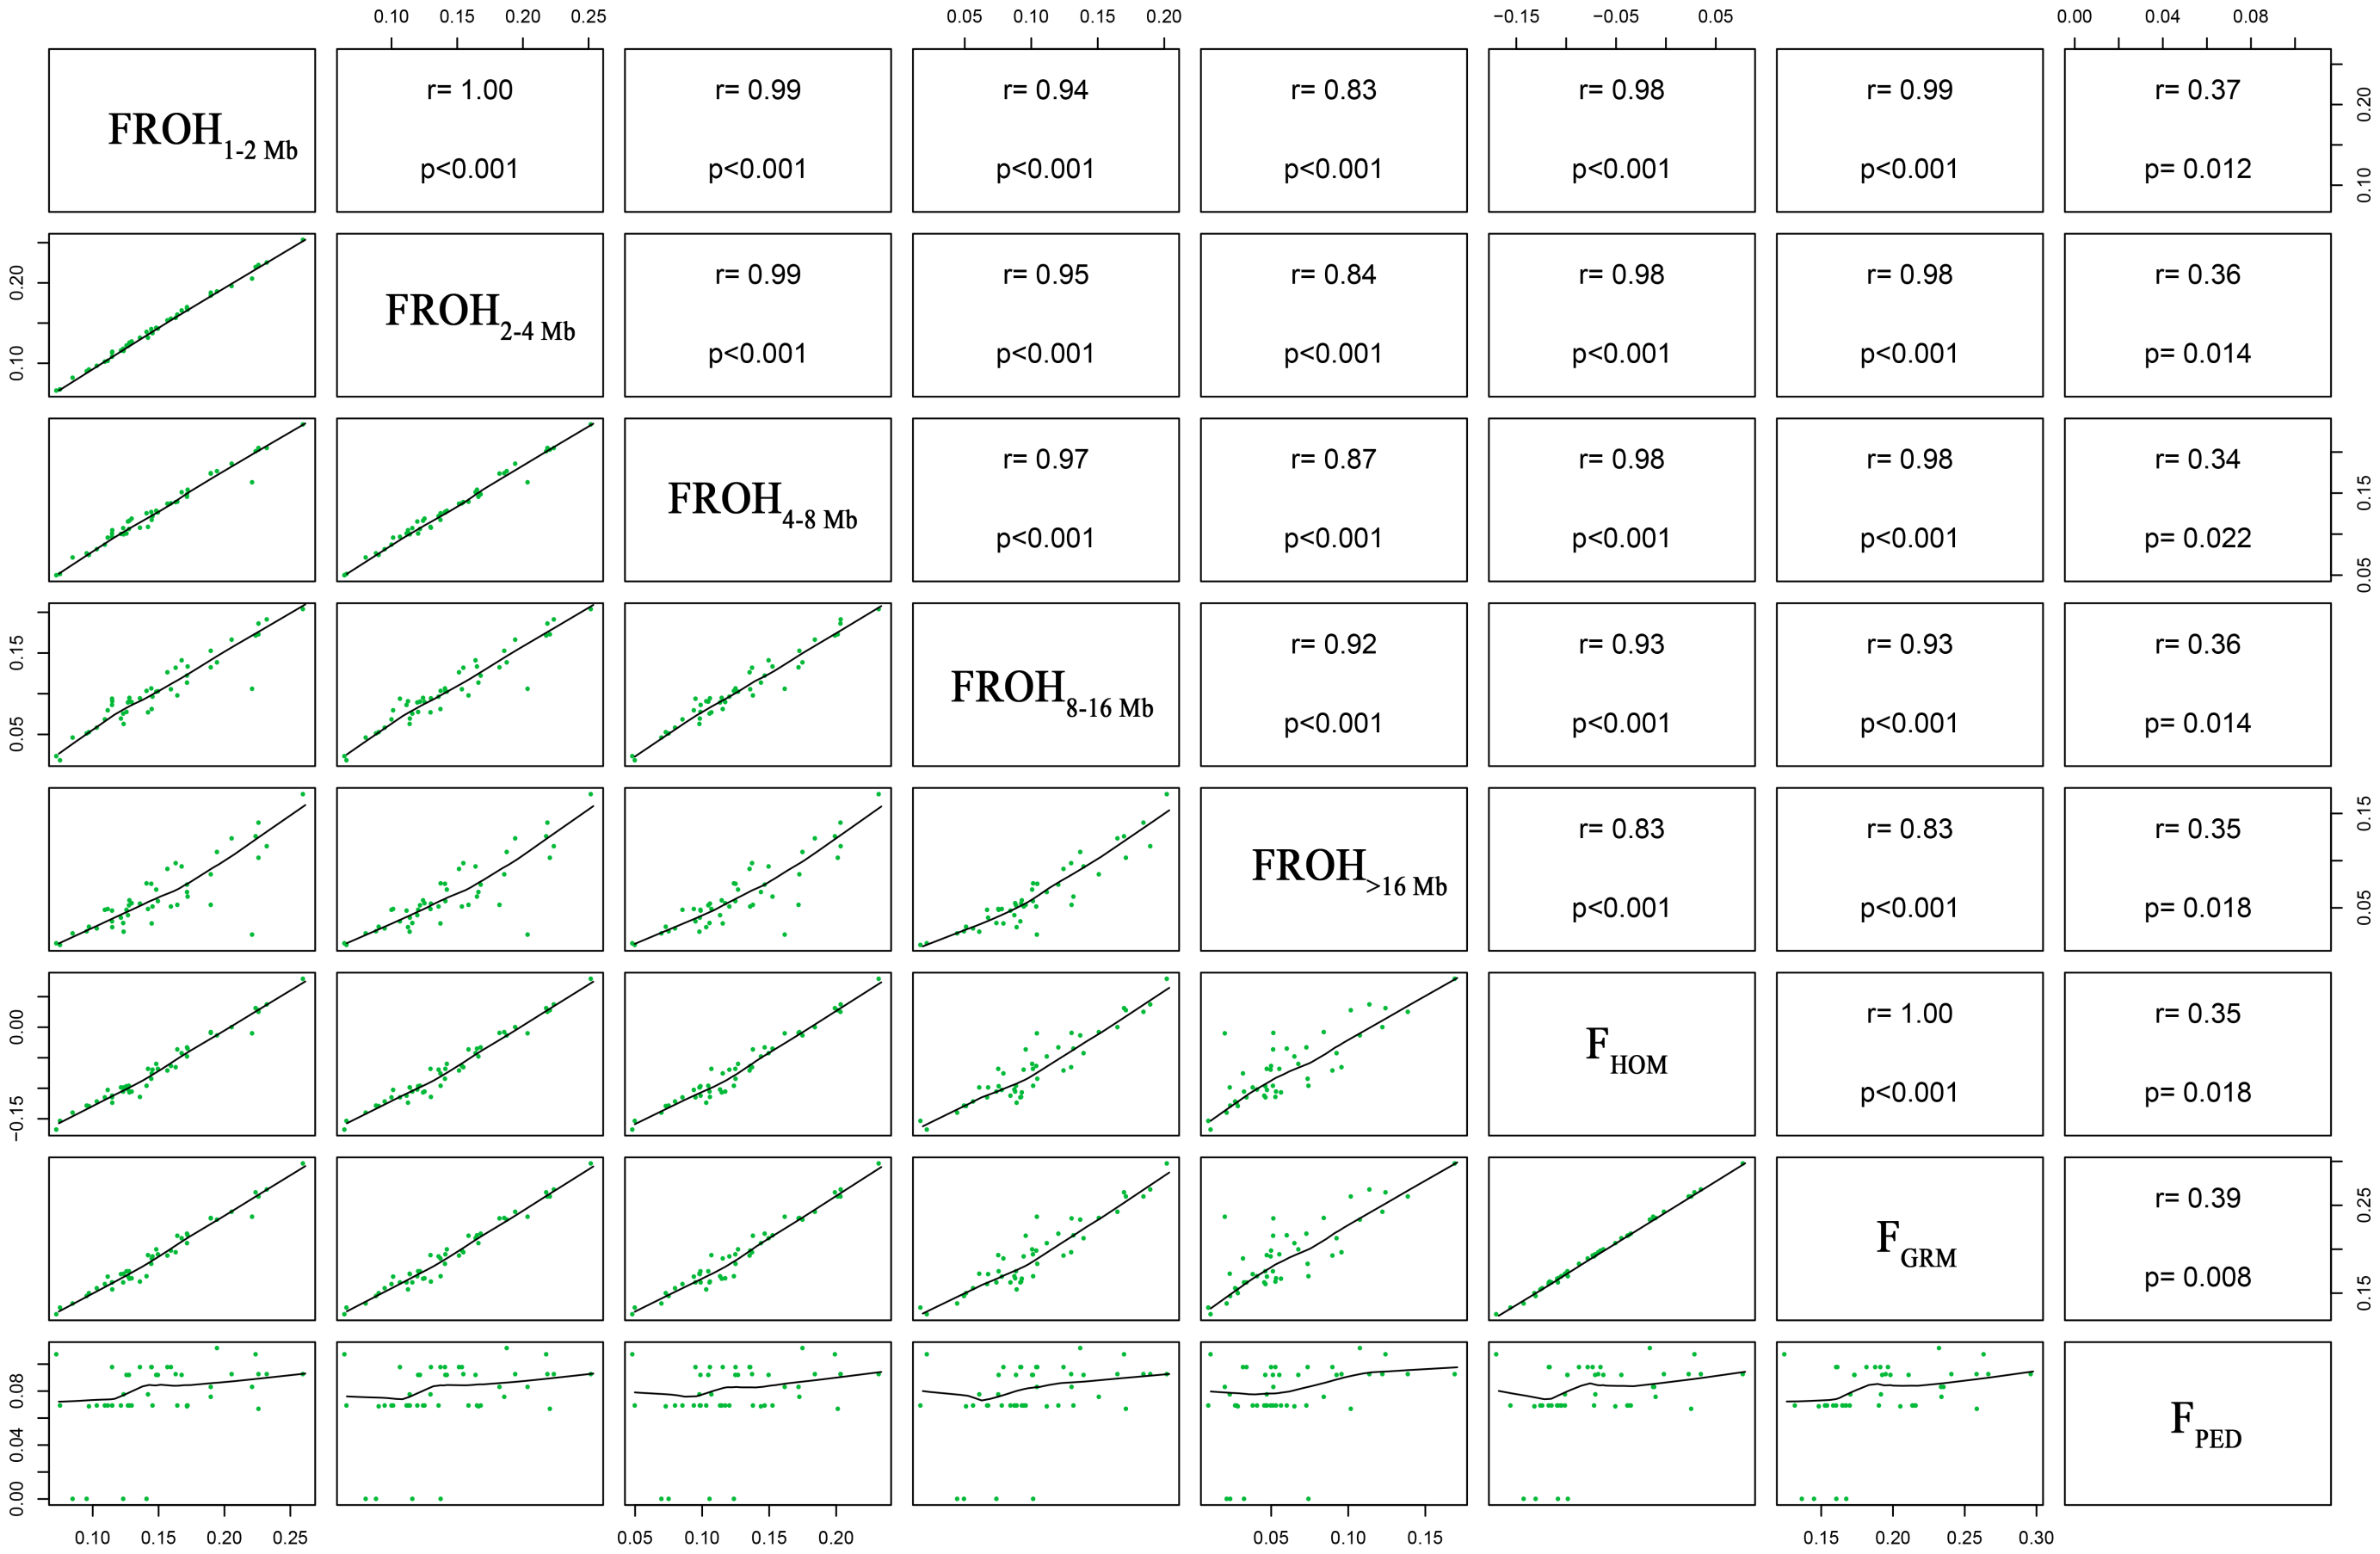

Supplement: s1 [file s1]

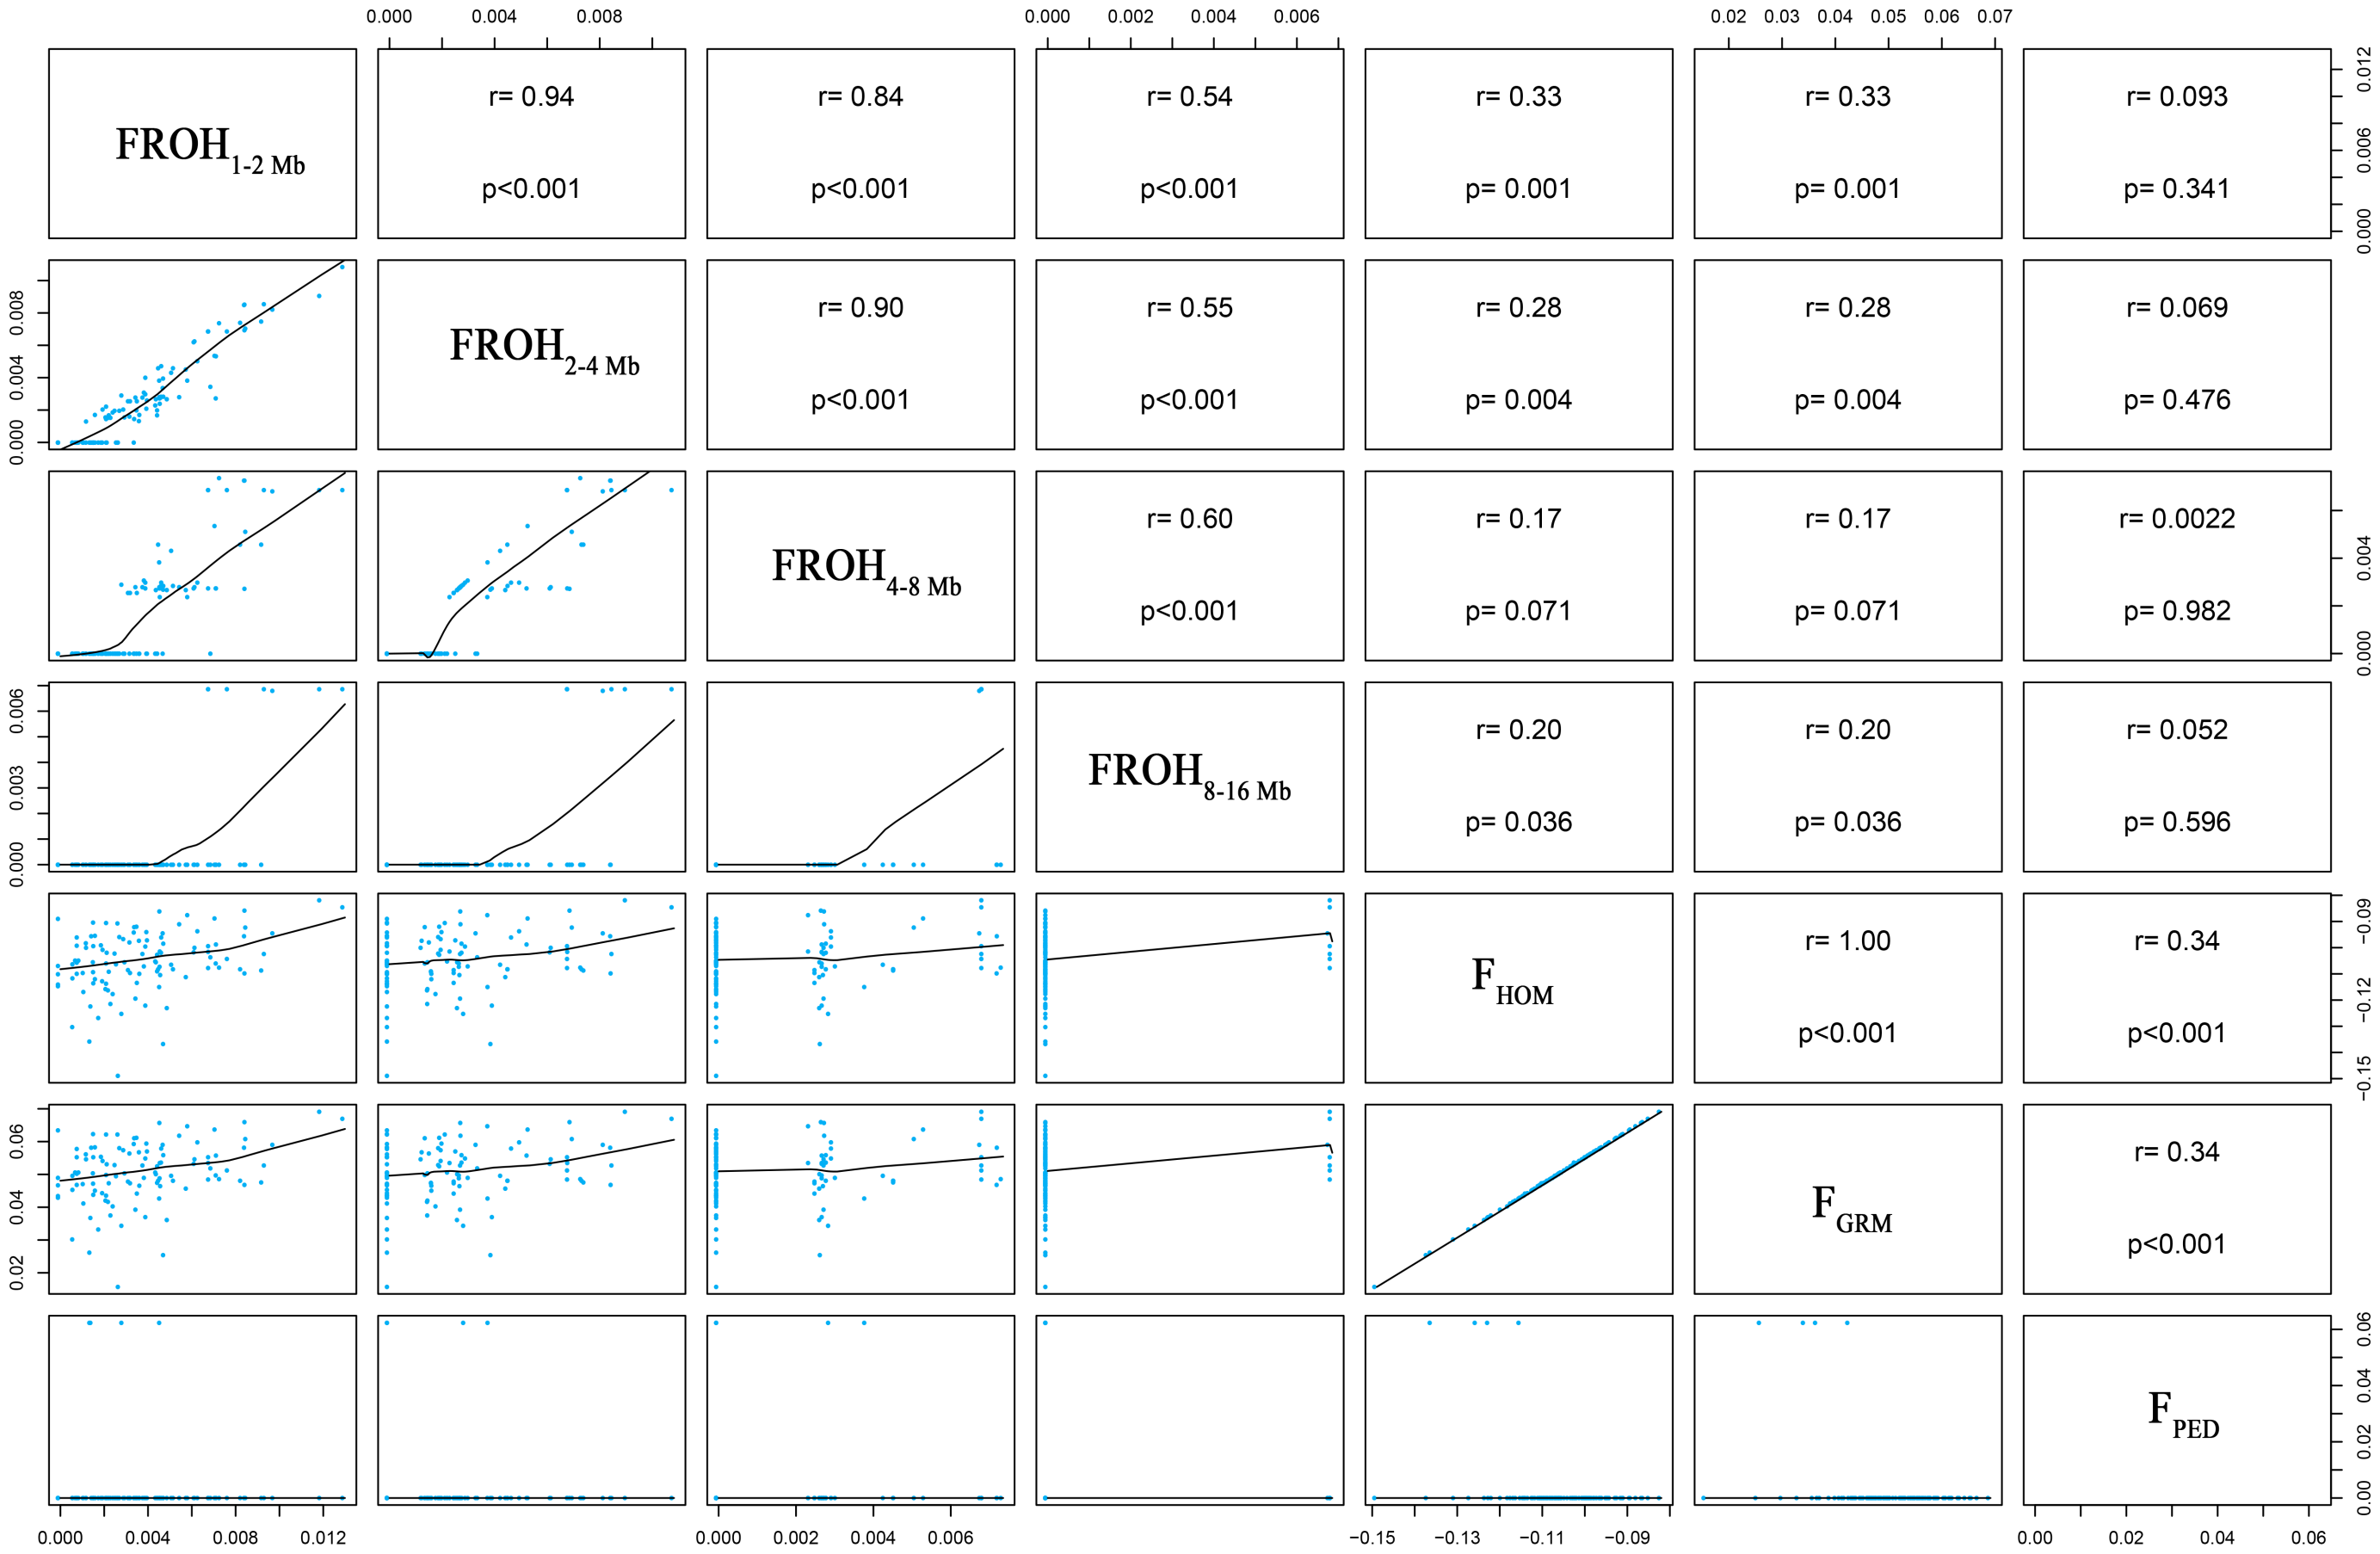

Supplement: s1 [file s1]
